# Supplementary material for: Aqueous extract of Artemisia capillaris improves non-alcoholic fatty liver and obesity in mice induced by high-fat diet
Source: Front Pharmacol. 2022 Nov 28;13:1084435. doi: 10.3389/fphar.2022.1084435 (PMC9742474; doi:10.3389/fphar.2022.1084435)
Supplement: Supplementary file 1 [file Table2.XLSX]

## Sheet: meta_intensity_all
Compound_ID	Name	Chinese name	Formula	Molecular Weight	RT [min]	Class(English)	Class(Chinese)	CAS	all_YC	all_QC1	all_QC2
Com_1782_pos	D-Pyroglutamic acid	D-焦谷氨酸	C5H7NO3	129.114	1.62	Amino Acid And Derivatives	氨基酸及其衍生物	"4042-36-8"	562900000	328400000	285600000
Com_102_neg	1-Caffeoylquinic acid	1-咖啡酰奎宁酸	C16H18O9	354.095	5.46	Phenolic acids	酚酸类	"1241-87-8"	561300000	456500000	466600000
Com_302_neg	Isochlorogenic acid A	异绿原酸A	C25H24O12	516.451	6.912	Alcohols and polyols	醇类和多元醇类	"2450-53-5"	537700000	469000000	485200000
Com_45_neg	1,5-Dicaffeoylquinic acid	1,5-二咖啡酰奎宁酸	C25H24O12	516.458	6.89	Alcohols and polyols	醇类和多元醇类	"30964-13-7"	531200000	427100000	414000000
Com_649_neg	Cynarin	1,4-二咖啡酰奎宁酸	C25H24O12	516.458	6.89	Organic Acid And Its Derivatives	有机酸及其衍生物	"1182-34-9"	497600000	381900000	357400000
Com_1155_pos	isoleucine	异亮氨酸	C6H13NO2	131.17	2.11	Amino Acid And Derivatives	氨基酸及其衍生物	"73-32-5"	487100000	383900000	371700000
Com_1158_pos	L-Leucine	L-亮氨酸	C6H13NO2	131.17	2.32	Amino Acid And Derivatives	氨基酸及其衍生物	"61-90-5"	421300000	337100000	328300000
Com_1777_pos	L-Phenylalanine	L-苯丙氨酸	C9H11NO2	165.19	4.108	Amino Acid And Derivatives	氨基酸及其衍生物	"63-91-2"	402600000	400800000	401800000
Com_1222_pos	D-Phenylalanine	D-苯丙氨酸	C9H11NO2	165.19	4.106	Amino Acid And Derivatives	氨基酸及其衍生物	"673-06-3"	384400000	383600000	389100000
Com_1084_pos	D-Proline	D-脯氨酸	C5H9NO2	115.13	0.967	Amino Acid And Derivatives	氨基酸及其衍生物	"344-25-2"	377200000	366100000	271500000
Com_989_pos	Proline	DL-脯氨酸	C5H9NO2	115.131	0.96	Amino Acid And Derivatives	氨基酸及其衍生物	"609-36-9"	365900000	290500000	242600000
Com_861_pos	N2-Acetyl-L-lysine	Nα-乙酰-L-赖氨酸	C8H16N2O3	188.224	1.03	Amino Acid And Derivatives	氨基酸及其衍生物	"1946-82-3"	320400000	248300000	244400000
Com_1095_pos	HBOA	2-羟基-2H-1,4-苯并噁嗪-3(4H)-酮	C8H7NO3	165.042	4.15	Organoheterocyclic compounds	有机杂环化合物	"23520-34-5"	316200000	307000000	318800000
Com_1454_pos	Diethyl glutarate	戊二酸二乙酯	C9H16O4	188.105	0.67	Fatty Acyls	脂肪酰类	"818-38-2"	299200000	227300000	221900000
Com_701_neg	L(-)-Malic acid	L-苹果酸	C4H6O5	134.022	1.08	Tca Cycle	三羧酸循环	"636-61-3"	285800000	187700000	188300000
Com_754_neg	Quinic acid	奎尼酸	C7H12O6	192.17	0.998	Alcohols and polyols	醇类和多元醇类	"77-95-2"	280400000	173600000	195000000
Com_411_neg	Isochlorogenic acid C	异绿原酸C	C25H24O12	516.451	7.053	Alcohols and polyols	醇类和多元醇类	"57378-72-0"	267100000	157000000	155300000
Com_922_pos	Betaine	甜菜碱	C5H11NO2	117.15	0.907	Alkaloids and derivatives	生物碱及其衍生物	"107-43-7"	255300000	177100000	166800000
Com_162_neg	Isocitrate	异柠檬酸	C6H8O7	192.124	1.49	Organic Acid And Its Derivatives	有机酸及其衍生物	"320-77-4"	235100000	222800000	276100000
Com_990_pos	Valine	DL-缬氨酸	C5H11NO2	117.146	1.09	Amino Acid And Derivatives	氨基酸及其衍生物	"516-06-3"	225500000	107100000	100400000
Com_350_neg	D-Gluconic acid	D-葡萄糖酸	C6H12O7	196.155	0.91	Carbohydrates And Its Derivatives	糖类及其衍生物	"526-95-4"	223200000	118400000	121700000
Com_656_neg	4,5-DCQA Isochlorogenic acid C	4,5-二咖啡酰奎宁酸	C25H24O12	516.458	6.93	Phenols And Its Derivatives	酚类及其衍生物	"32451-88-0"	221400000	126200000	141700000
Com_895_pos	N-acetylglycine	N-乙酰基甘氨酸	C4H7NO3	117.043	0.91	Amino Acid And Derivatives	氨基酸及其衍生物	"543-24-8"	215300000	142100000	135700000
Com_863_pos	N-Methyl-a-aminoisobutyric acid	N-甲基-α-氨基异丁酸	C5H11NO2	117.146	1.22	Amino Acid And Derivatives	氨基酸及其衍生物	"2566-34-9"	215300000	105400000	94760000
Com_1225_pos	DL-Norvaline	D-正缬氨酸	C5H11NO2	117.15	1.068	Amino Acid And Derivatives	氨基酸及其衍生物	"760-78-1"	206800000	108200000	116000000
Com_331_neg	Citric acid	柠檬酸	C6H8O7	192.12	1.516	Tca Cycle	三羧酸循环	"77-92-9"	191200000	189300000	216200000
Com_901_pos	7-methylguanine	7-甲基鸟嘌呤	C6H7N5O	165.065	4.11	Purines and purine derivatives	嘌呤及其衍生物	"578-76-7"	188900000	183800000	182500000
Com_750_neg	Isoquercitrin	槲皮素3-β-D-葡萄糖苷	C21H20O12	464.38	6.596	Flavones and Flavonols	黄酮和黄酮醇	"482-35-9"	188700000	52520000	45300000
Com_104_neg	Isochlorogenic acid B	异绿原酸B	C25H24O12	516.451	6.768	Alcohols and polyols	醇类和多元醇类	"14534-61-3"	188300000	82120000	93080000
Com_988_pos	Dl-Norleucine	DL-正亮氨酸	C6H13NO2	131.173	0.9	Amino Acid And Derivatives	氨基酸及其衍生物	"616-06-8"	181900000	120700000	113700000
Com_899_pos	1-O-Caffeoyl quinic acid	1-咖啡酰奎宁酸	C16H18O9	354.095	5.43	Alcohols and polyols	醇类和多元醇类		158900000	139000000	139700000
Com_1301_pos	Hesperetin 5-O-glucoside	橙皮素5-O-葡萄糖甙	C22H24O11	464.419	6.59	Flavanones	黄烷酮	"69651-80-5"	158400000	83390000	94220000
Com_360_neg	Cryptochlorogenic acid	隐绿原酸	C16H18O9	354.309	5.443	Alcohols and polyols	醇类和多元醇类	"905-99-7"	157400000	88920000	94560000
Com_271_neg	Isotrifoliin	异槲皮甙	C21H20O12	464.096	6.59	Flavonoids	类黄酮	"21637-25-2"	153200000	34590000	32900000
Com_914_pos	Cycloleucine	环亮氨酸	C6H11NO2	129.157	0.84	Amino Acid And Derivatives	氨基酸及其衍生物	"52-52-8"	151800000	273700000	230200000
Com_986_pos	Dl-Indole-3-lactic acid	DL-吲哚-3-乳酸	C11H11NO3	205.21	4.87	Indoles and derivatives	吲哚及其衍生物	"832-97-3"	149600000	240700000	231600000
Com_675_neg	D-Galactonic acid	D-半乳糖酸	C6H12O7	196.155	0.92	Organic Acid And Its Derivatives	有机酸及其衍生物	"13382-27-9"	143600000	76240000	76970000
Com_260_neg	Spiraeoside	绣线菊甙	C21H20O12	464.096	6.59	Flavonoids	类黄酮	"20229-56-5"	142000000	35890000	34090000
Com_758_pos	L-Methionine sulfone	L-蛋氨酸砜	C5H11NO4S	181.21	1.84	Amino Acid And Derivatives	氨基酸及其衍生物	"7314-32-1"	141800000	145800000	142200000
Com_1519_pos	N-Acetyl-L-leucine	N-乙酰-L-亮氨酸	C8H15NO3	173.21	1.04	Amino Acid And Derivatives	氨基酸及其衍生物	"1188-21-2"	138100000	46470000	35430000
Com_400_neg	2,6-Dihydroxybenzoic acid	2,6-二羟基苯甲酸	C7H6O4	154.12	6.13	Benzoic acids and derivatives	苯甲酸及其衍生物	"303-07-1"	137200000	56450000	56110000
Com_370_neg	Quercetin-3'-O-glucoside	槲皮素-3'-O-葡萄糖苷	C21H20O12	464.382	6.53	Flavones and Flavonols	黄酮和黄酮醇		137100000	43650000	40740000
Com_501_neg	4'-Hydroxyacetophenone	对羟基苯乙酮	C8H8O2	136.15	6.6	Ketones	酮类	"99-93-4"	135600000	38490000	37430000
Com_1240_pos	Lycoperodine	(S)-2,3,4,9-四氢-1H-吡啶[3,4-b]吲哚-3-羧酸	C12H12N2O2	216.236	5.47	Indoles and derivatives	吲哚及其衍生物	"42438-90-4"	134500000	70370000	66630000
Com_464_neg	D-threo-Isocitric acid	D-苏氨酸-异柠檬酸	C6H8O7	192.124	1.41	Organic Acid And Its Derivatives	有机酸及其衍生物	"6061-97-8"	131700000	99610000	104900000
Com_231_neg	Succinic acid	琥珀酸	C4H6O4	118.09	1.936	Tca Cycle	三羧酸循环	"110-15-6"	127200000	77250000	81820000
Com_436_neg	GA7-1	赤霉素7-1	C19H22O5	330.4	9.22	Phytohormones	植物激素		126800000	71320000	73530000
Com_1165_pos	D-Proline betaine	脯氨酸甜菜碱	C7H14NO2+	144.092	1	Amino Acid And Derivatives	氨基酸及其衍生物	"1195-94-4"	126600000	346700000	414300000
Com_207_neg	Chlorogenic Acid	绿原酸	C16H18O9	354.31	5.37	Alcohols and polyols	醇类和多元醇类	"327-97-9"	124200000	67320000	66430000
Com_1015_pos	Pipecolic acid	哌啶甲酸	C6H11NO2	129.16	1.042	Amino Acid And Derivatives	氨基酸及其衍生物	"535-75-1"	120200000	129400000	156200000
Com_646_neg	Neochlorogenic acid	新绿原酸	C16H18O9	354.309	4.879	Polyphenol	多酚	"906-33-2"	117800000	62260000	68020000
Com_363_neg	Quercitrin	槲皮苷	C21H20O11	448.38	7.24	Flavones and Flavonols	黄酮和黄酮醇	"522-12-3"	114000000	31800000	31010000
Com_215_neg	Caffeic acid	咖啡酸	C9H8O4	180.16	5.801	Cinnamic acids and derivatives	肉桂酸及其衍生物	"331-39-5"	111500000	50240000	47760000
Com_1014_pos	L-Tryptophan	L-色氨酸	C11H12N2O2	204.23	4.894	Amino Acid And Derivatives	氨基酸及其衍生物	"73-22-3"	106200000	173500000	167200000
Com_589_neg	Rutin	芦丁	C27H30O16	610.518	6.451	Flavones and Flavonols	黄酮和黄酮醇	"153-18-4"	105000000	116800000	113900000
Com_857_pos	Betanin	甜菜红苷	C24H26N2O13	550.143	6.65	Alkaloids and derivatives	生物碱及其衍生物	"7659-95-2"	104500000	28630000	28090000
Com_1058_pos	Aminopurine	乙酰苯胺	C5H5N5	135.1	1.24	Purines and purine derivatives	嘌呤及其衍生物		100500000	32740000	32900000
Com_1539_pos	D-Arabitol	阿拉伯糖醇	C5H12O5	152.15	0.926	Sugar Alcohols	糖醇	"488-82-4"	100100000	225000000	219600000
Com_1270_pos	Rhodionin	草质素苷	C21H20O11	448.383	7.56	Flavonoids	类黄酮	"85571-15-9"	99550000	41800000	39250000
Com_783_pos	Maleic acid	马来酸	C4H4O4	116.011	0.96	Organic Acid And Its Derivatives	有机酸及其衍生物	"110-16-7"	98810000	59200000	56020000
Com_1122_pos	Quercetin 5-O-hexoside	槲皮素-5-O-己糖苷	C21H20O12	464.376	6.52	Flavones and Flavonols	黄酮和黄酮醇		98670000	39760000	18720000
Com_27_neg	9,10,13-Trihydroxyoctadec-11-enoic acid	9,10,13-三羟基-11-十八碳烯酸	C18H34O5	330.241	9.12	Fatty Acyls	脂肪酰类	"29907-57-1"	97210000	54070000	55690000
Com_96_neg	Myricitrin	杨梅苷	C21H20O12	464.38	6.547	Flavones and Flavonols	黄酮和黄酮醇	"17912-87-7"	95360000	22440000	20920000
Com_377_neg	Di-O-methylquercetin	3,7-二氧-甲基槲皮素	C17H14O7	330.1	9.19	Flavonoids	类黄酮		95320000	52730000	53120000
Com_612_neg	Rutin hydrate	芸香苷水合物	C27H30O16.xH2O	610.52	6.36	Flavonoids	类黄酮	"207671-50-9"	93920000	109300000	110300000
Com_1380_pos	Stachydrine	水苏碱	C7H13NO2	143.18	1.008	Amino Acid And Derivatives	氨基酸及其衍生物	"471-87-4"	92310000	414800000	373600000
Com_1321_pos	1-Methylpiperidine-2-carboxylic acid	1-甲基哌啶-2-羧酸	C7H13NO2	143.095	0.99	Amino Acid And Derivatives	氨基酸及其衍生物	"7730-87-2"	86890000	241300000	282600000
Com_398_neg	3,5-Dihydroxybenzoic acid	3,5-二羟基苯甲酸	C7H6O4	154.12	4.461	Benzoic acids and derivatives	苯甲酸及其衍生物	"99-10-5"	86170000	79560000	80610000
Com_386_neg	Hyperoside	槲皮素3-D-半乳糖苷	C21H20O12	464.38	6.554	Flavones and Flavonols	黄酮和黄酮醇	"482-36-0"	85650000	16010000	19760000
Com_1235_pos	2-Aminoisobutyric acid	2-氨基异丁酸	C4H9NO2	103.063	0.82	Amino Acid And Derivatives	氨基酸及其衍生物	"62-57-7"	81650000	158100000	153100000
Com_730_neg	Isomucronulatol-7-O-glucoside	黄芪异黄烷苷	C23H28O10	464.469	6.53	Flavonoids	类黄酮	"94367-43-8"	81530000	20050000	19120000
Com_1669_pos	Quercetin-O-glucoside	槲皮素-O-葡萄糖苷	C21H20O12	464.376	6.54	Flavones and Flavonols	黄酮和黄酮醇		80960000	23380000	23420000
Com_1736_pos	Luteolin O-malonylhexoside	木犀草素O-丙二酰己糖苷	C24H22O14	534.43	7.02	Flavonoids	类黄酮		79400000	20080000	17520000
Com_1288_pos	L-Glutamic acid	L-谷氨酸	C5H9NO4	147.13	0.886	Amino Acid And Derivatives	氨基酸及其衍生物	"56-86-0"	75220000	42820000	41380000
Com_1521_pos	N-Acetyl-Dl-glutamic acid	N-乙酰-DL-谷氨酸	C7H11NO5	189.166	1.84	Amino Acid And Derivatives	氨基酸及其衍生物	"5817-08-3"	74910000	18800000	21890000
Com_1522_pos	N6-Succinyl Adenosine	N6-琥珀酰腺苷	C14H17N5O8	383.313	4.54	Nucleotide And Its Derivates	核苷酸及其衍生物	"4542-23-8"	73930000	35580000	36290000
Com_619_neg	N alpha-Acetyl-L-glutamine	N-乙酰基-L-谷氨酰胺	C7H12N2O4	188.08	7.4	Amino Acid And Derivatives	氨基酸及其衍生物	"2490-97-3"	71770000	22980000	22220000
Com_1365_pos	trans-3-Hydroxy-L-proline	反-3-羟基-L-脯氨酸	C5H9NO3	131.13	2.14	Amino Acid And Derivatives	氨基酸及其衍生物	"4298-08-2"	71100000	46070000	42520000
Com_333_neg	cis-Aconitic acid	顺式乌头酸	C6H6O6	174.11	1.766	Tca Cycle	三羧酸循环	"585-84-2"	70310000	52180000	53510000
Com_1402_pos	6-Aminocaproic acid	6-氨基己酸	C6H13NO2	131.095	2.07	Fatty Acyls	脂肪酰类	"60-32-2"	69260000	43040000	41160000
Com_1627_pos	Scopoletin	东莨菪内酯	C10H8O4	192.17	6.933	Coumarins and derivatives	香豆素及其衍生物	"92-61-5"	64340000	34390000	34180000
Com_1265_pos	Cytidine	胞苷	C9H13N3O5	243.22	1.029	Nucleotide And Its Derivates	核苷酸及其衍生物	"65-46-3"	64040000	18490000	27010000
Com_1107_pos	Apigenin-6,8-di-C-glycoside	芹菜素-6,8-二-C-葡萄糖苷	C27H30O15	594.518	5.73	Flavonoids	类黄酮	"23666-13-9"	62770000	134500000	134800000
Com_362_neg	2,3-Dihydroxybenzoic acid	2,3-二羟基苯甲酸	C7H6O4	154.027	6.21	Benzoic acids and derivatives	苯甲酸及其衍生物	"303-38-8"	59650000	21840000	21350000
Com_543_neg	L-Proline	L-脯氨酸	C5H9NO2	115.131	0.94	Amino Acid And Derivatives	氨基酸及其衍生物	"147-85-3"	57550000	15710000	18330000
Com_312_neg	Methylmalonate	甲基丙二酸	C4H6O4	118.09	1.938	Organic Acid And Its Derivatives	有机酸及其衍生物	"516-05-2"	55760000	32390000	34390000
Com_1468_pos	Isorhamnetin rutinose	异鼠李素云苷	C28H32O16	624.54	6.7	Flavonoids	类黄酮		54680000	35450000	29390000
Com_1284_pos	N-Methylsarcosine	N,N-二甲基甘氨酸	C4H9NO2	103.12	0.9	Amino Acid And Derivatives	氨基酸及其衍生物	"1118-68-9"	49510000	89970000	86220000
Com_530_neg	Protocatechuic acid	原儿茶酸	C7H6O4	154.12	4.571	Phenols And Its Derivatives	酚类及其衍生物	"99-50-3"	45060000	44190000	44710000
Com_1256_pos	Lysine butyrate	赖氨酸丁酸	C10H22N2O4	234.1	0.89	Amino Acid And Derivatives	氨基酸及其衍生物	"80407-71-2"	44050000	16170000	15030000
Com_1066_pos	Trigonelline	胡芦巴碱	C7H7NO2	137.136	1	Alkaloids and derivatives	生物碱及其衍生物	"535-83-1"	43720000	43480000	38830000
Com_236_neg	D-Galactaric acid	D-半乳糖二酸	C6H10O8	210.038	0.87	Carbohydrates And Its Derivatives	糖类及其衍生物	"526-99-8"	42640000	31810000	33140000
Com_1520_pos	2-Phenylglycine	DL-苯甘氨酸	C8H9NO2	151.163	2.78	Amino Acid And Derivatives	氨基酸及其衍生物	"2835-06-5"	41640000	57340000	55450000
Com_786_pos	Chrysoeriol 7-O-rutinoside	金圣草黄素 7-O-芸香糖苷	C28H32O15	608.545	6.94	Flavonoids	类黄酮		40490000	250600000	247900000
Com_24_neg	1-O-Gentisoyl-D-glucoside	1-O-龙胆酰-D-葡萄糖	C13H16O9	316.079	4.56	Phenolic acids	酚酸类	"23445-11-6"	40090000	98070000	107500000
Com_1708_pos	Leucine	亮氨酸	C6H13NO2	131.175	2.1	Amino Acid And Derivatives	氨基酸及其衍生物	"26782-71-8"	39940000	25560000	23130000
Com_1169_pos	Acetaminophen	对乙酰氨基酚	C8H9NO2	151.163	2.76	Phenols And Its Derivatives	酚类及其衍生物	"103-90-2"	39880000	55660000	53800000
Com_1525_pos	2-Hydroxy-6-Aminopurine	2-羟基-6-氨基嘌呤	C5H5N5O	151.126	2.76	Purines and purine derivatives	嘌呤及其衍生物	"3373-53-3"	39390000	56080000	50650000
Com_1576_pos	S-Methyl-L-cysteine	S-甲基-L-半胱氨酸	C4H9NO2S	135.185	1.04	Amino Acid And Derivatives	氨基酸及其衍生物	"1187-84-4"	39230000	6331000	7981000
Com_1262_pos	Uridine	尿苷	C9H12N2O6	244.2	1.86	Nucleotide And Its Derivates	核苷酸及其衍生物	"58-96-8"	37800000	29660000	26560000
Com_598_neg	Citramalate	甲基苹果酸	C5H8O5	148	2.04	Organic Acid And Its Derivatives	有机酸及其衍生物	"2306-22-1"	36230000	18960000	19110000
Com_980_pos	Caffeic aldehyde	咖啡醛	C9H8O3	164.1	1.84	Phenylpropanoids and polyketides	苯丙素和聚酮化合物		35710000	35680000	35410000
Com_211_neg	Quercetin O-acetylhexoside	槲皮素 O-乙酰基己糖苷	C23H22O13	506.1	6.9	Flavones and Flavonols	黄酮和黄酮醇		34770000	10830000	11020000
Com_869_pos	Quercetin-3-O-neohesperidoside	槲皮素 3-O-新橘皮糖苷	C27H30O16	610.153	6.35	Flavones and Flavonols	黄酮和黄酮醇	"117611-67-3"	34200000	27220000	38030000
Com_992_pos	Glutamine	谷氨酰胺	C5H10N2O3	146.145	0.81	Amino Acid And Derivatives	氨基酸及其衍生物	"585-21-7"	34150000	91470000	84980000
Com_245_neg	Malonic acid	丙二酸	C3H4O4	104.011	1.19	Organic Acid And Its Derivatives	有机酸及其衍生物	"141-82-2"	33870000	16650000	17430000
Com_599_neg	UDP	尿苷-5'-二磷酸	C9H14N2O12P2	404.16	0.7	Nucleotide And Its Derivates	核苷酸及其衍生物	"58-98-0"	33750000	21680000	19640000
Com_1253_pos	Octadecadien-6-ynoic acid	十八碳二烯-6-炔酸	C18H28O2	276.2	12.1	Fatty Acyls	脂肪酰类		33260000	17830000	15040000
Com_485_neg	Caffeic acid O-glucoside	咖啡酰 O-葡萄糖苷	C15H18O9	342	5.38	Cinnamic acids and derivatives	肉桂酸及其衍生物		33220000	38190000	37470000
Com_1712_pos	3-N-butyl-4,5-dihydrophthalide	洋川芎内酯A	C12H16O2	192.258	10.97	Organoheterocyclic compounds	有机杂环化合物	"62006-39-7"	32410000	349100000	325100000
Com_1134_pos	Adenine	腺嘌呤	C5H5N5	135.127	1.032	Purines and purine derivatives	嘌呤及其衍生物	"73-24-5"	32140000	8546000	8988000
Com_839_pos	Tricetin O-hexoside	五羟黄酮 O-邻己糖苷	C21H20O12	464.383	6.46	Flavonoids	类黄酮		31850000	35500000	31720000
Com_1162_pos	Zarzissine	H-咪唑并(4,5-d)吡啶-2-胺	C5H5N5	135.054	1.83	Organoheterocyclic compounds	有机杂环化合物	"160568-14-9"	31790000	30500000	29510000
Com_1518_pos	2'-O-methyladenosine	2'-O-甲基腺苷	C11H15N5O4	281.268	4.14	Nucleotide And Its Derivates	核苷酸及其衍生物	"2140-79-6"	30770000	20740000	20750000
Com_983_pos	Dl-Alanyl-glycine	DL-丙氨酰甘氨酸	C5H10N2O3	146.144	0.84	Amino Acid And Derivatives	氨基酸及其衍生物	"1188-01-8"	30760000	57170000	52880000
Com_113_neg	Calceolarioside B	木通苯乙醇苷B	C23H26O11	478.446	6.67	Phenylpropanoids	苯丙素类	"105471-98-5"	30400000	8444000	8211000
Com_937_pos	Tetraethylammonium fluoride	四乙基氟化铵	C8H20FN	149.25	1.04	Pyrimidines and pyrimidine derivatives	嘧啶及其衍生物	"665-46-3"	30070000	10930000	11740000
Com_1417_pos	L-lysine	L-赖氨酸	C6H14N2O2	146.19	0.74	Amino Acid And Derivatives	氨基酸及其衍生物	"56-87-1"	28540000	95510000	84720000
Com_1512_pos	4'-O-Glucosylvitexin	牡荆素葡萄糖苷	C27H30O15	594.518	6.28	Flavonoids	类黄酮	"38950-94-6"	27690326	26010000	24230000
Com_482_neg	N-Acetyl-L-glutamic acid	N-乙酰-L-谷氨酸	C7H11NO5	189.166	1.81	Amino Acid And Derivatives	氨基酸及其衍生物	"1188-37-0"	27530000	10220000	10510000
Com_1730_pos	Selgin O-malonylhexoside	羟甲基黄酮 O-丙二酰己糖苷	C25H24O15	564.457	7.19	Flavonoids	类黄酮		27250000	6796000	6683000
Com_773_pos	7-Ethylcamptothecin	7-乙基喜树碱	C22H20N2O4	376.41	9.44	Alkaloids and derivatives	生物碱及其衍生物	"78287-27-1"	26945094	23520000	21790000
Com_651_neg	D-Xylonic acid	木糖酸	C5H10O6	166.048	0.9	Organic Acid And Its Derivatives	有机酸及其衍生物	"526-91-0"	26350000	58670000	59160000
Com_1143_pos	Nicotinic acid-hexoside	烟酸-己苷	C12H15NO7	285.2	0.97	Carbohydrates And Its Derivatives	糖类及其衍生物		26110000	108800000	97150000
Com_1129_pos	Quercetin 7-O-rutinoside	槲皮素 7-O-芸香糖苷	C27H30O16	610.2	6.4	Flavones and Flavonols	黄酮和黄酮醇		26040000	52470000	80020000
Com_804_pos	Delphinidin 3-O-Rutinoside	花翠素 3-O-芸香糖苷	C27H31O16	611.5	6.35	Anthocyanins	花青素	"58285-26-0"	25630000	36060000	57390000
Com_1537_pos	Picolinic acid	2-吡啶甲酸	C6H5NO2	123.11	1.467	Pyridines and derivatives	吡啶及其衍生物	"98-98-6"	25330000	20930000	28060000
Com_1156_pos	D-glutamine	D-谷氨酰胺	C5H10N2O3	146.14	0.86	Amino Acid And Derivatives	氨基酸及其衍生物	"5959-95-5"	25050000	44780000	44450000
Com_1747_pos	di-C,C-hexosyl-apigenin	芹菜素C,C-二己糖苷	C27H30O15	594.518	5.82	Flavonoids	类黄酮		24620000	77700000	69710000
Com_351_neg	Aspartate	DL-天冬氨酸	C4H7NO4	133.103	0.85	Amino Acid And Derivatives	氨基酸及其衍生物	"617-45-8"	24520000	48030000	56460000
Com_987_pos	DL-Leucine	DL-亮氨酸	C6H13NO2	131.173	2.3	Amino Acid And Derivatives	氨基酸及其衍生物	"328-39-2"	23760000	17270000	16840000
Com_687_neg	Morin	桑色素水合物	C15H10O7	302.043	8.05	Flavonoids	类黄酮	"6472-38-4"	23560000	7700000	6552000
Com_1085_pos	L-arginine	精氨酸	C6H14N4O2	174.2	0.794	Amino Acid And Derivatives	氨基酸及其衍生物	"74-79-3"	22680000	128300000	116800000
Com_1173_pos	Chalcone	苯亚甲基苯乙酮	C15H12O	208.255	6.47	Flavonoids	类黄酮	"94-41-7"	22500000	5294000	5337000
Com_532_neg	Salicylic acid	水杨酸	C7H6O3	138.12	7.67	Phytohormones	植物激素	"69-72-7"	22350000	10330000	11070000
Com_1223_pos	Nicotinic Acid	烟酸	C6H5NO2	123.11	1.478	Vitamins	维生素	"59-67-6"	22210000	19530000	29920000
Com_349_neg	D-Glucarate	葡萄糖二酸	C6H10O8	210.139	0.82	Carbohydrates And Its Derivatives	糖类及其衍生物	"87-73-0"	22060000	14410000	15310000
Com_597_neg	Luteolin 7-O-glucoside	木犀草素 7-O-葡萄糖苷	C21H20O11	448.38	6.664	Flavonoids	类黄酮	"5373-11-5"	21680000	4365000	5260000
Com_1232_pos	Acetylcholine	乙酰胆碱	C7H16NO2	146.118	1.02	Cholines	胆碱	"60-31-1"	21250000	9415000	10930000
Com_806_pos	Cyanidin 3-O-malonylhexoside	矢车菊素 3-O-丙二酰己糖苷	C24H23O14	535.1	6.73	Anthocyanins	花青素		21200000	5123000	4852000
Com_259_neg	Citraconic acid	柠康酸	C5H6O4	130.099	1.56	Fatty Acyls	脂肪酰类	"498-23-7"	21170000	18820000	17820000
Com_1363_pos	Neodiosmin	新地奥斯明	C28H32O15	608.545	7.12	Flavones and Flavonols	黄酮和黄酮醇	"38665-01-9"	21140000	165000000	160100000
Com_85_neg	Isorhamnetin-3-O-neohespeidoside	异鼠李素-3-O-新橙皮苷	C28H32O16	624.552	6.79	Flavonoids	类黄酮	"55033-90-4"	20560000	7836000	7585000
Com_323_neg	2–furanoic acid	2–呋喃甲酸	C5H4O3	112.084	1.49	Organic Acid And Its Derivatives	有机酸及其衍生物	"88-14-2"	20550000	18110000	22100000
Com_1415_pos	DL-Glutamine	DL-谷氨酰胺	C5H10N2O3	146.14	0.84	Amino Acid And Derivatives	氨基酸及其衍生物	"6899-04-3"	19940000	56170000	50480000
Com_1170_pos	Benzamidine	苯甲脒	C7H8N2	120.152	4.09	Benzene and substituted derivatives	苯及其取代衍生物	"618-39-3"	19920000	18520000	17530000
Com_108_neg	Narirutin	芸香柚皮苷	C27H32O14	580.535	6.837	Flavanones	黄烷酮	"14259-46-2"	19660000	350700000	360900000
Com_927_pos	Histamine	组胺	C5H9N3	111.145	1.04	Amines	胺类	"51-45-6"	18940000	4488000	5635000
Com_1161_pos	(S)-2-Phenyloxirane	(S)-2-苯基环氧乙烷	C8H8O	120.058	2.01	Benzene and substituted derivatives	苯及其取代衍生物	"20780-54-5"	18580000	6339000	6430000
Com_1312_pos	2-Methylcinnamic acid	2-甲基肉桂酸	C10H10O2	162.185	5.53	Cinnamic acids and derivatives	肉桂酸及其衍生物	"2373-76-4"	18040000	9230000	10300000
Com_1538_pos	Isonicotinic acid	异烟酸	C6H5NO2	123.11	1.029	Vitamins	维生素	"55-22-1"	18010000	69200000	50700000
Com_1219_pos	Nicotinamide	烟酰胺	C6H6N2O	122.12	1.539	Vitamins	维生素	"98-92-0"	17610000	27850000	23120000
Com_251_neg	Kaempferol7-O-beta-D-glucopyranoside	山奈酚-7-O-β-D-吡喃葡萄糖苷	C21H20O11	448.377	6.65	Flavones and Flavonols	黄酮和黄酮醇	"16290-07-6"	17550000	3763000	3715000
Com_1059_pos	2-Aminoadipic acid	2-氨基己二酸 (L-高谷氨酸)	C6H11NO4	161.1	0.95	Amino Acid And Derivatives	氨基酸及其衍生物	"1118-90-7"	17380000	5904000	8320000
Com_243_neg	(2S)-2-Isopropylmalate	(2S)-2-异丙基苹果酸	C7H12O5	176.068	5.52	Organic Acid And Its Derivatives	有机酸及其衍生物	"49601-06-1"	17300000	7288000	7421000
Com_796_pos	Pro-Leu	脯氨酸-亮氨酸	C11H20N2O3	228.288	1.72	Amino Acid And Derivatives	氨基酸及其衍生物	"52899-07-7"	17250000	96550000	83740000
Com_668_neg	2,5-Dihydroxybenzoic acid	2,5-二羟基苯甲酸	C7H6O4	154.12	5.44	Benzoic acids and derivatives	苯甲酸及其衍生物	"490-79-9"	17090000	15730000	17810000
Com_1295_pos	N6-(2-Hydroxyethyl)adenosine	N6-(2-羟乙基)腺苷	C12H17N5O5	311.123	4.7	Nucleotide And Its Derivates	核苷酸及其衍生物	"4338-48-1"	17000000	7253000	6993000
Com_1306_pos	Indole-3-Carboxaldehyde	吲哚-3-甲醛	C9H7NO	145.158	7.33	Indoles and derivatives	吲哚及其衍生物	"487-89-8"	16880000	8220000	6984000
Com_1662_pos	Lysine	赖氨酸	C6H14N2O2	146.188	0.85	Amino Acid And Derivatives	氨基酸及其衍生物	"70-54-2"	16430000	48260000	46030000
Com_1371_pos	trans-3,5-Dimethoxy-4-hydroxycinnamaldehyde	反式-3,5-二甲氧基-4-羟基肉桂醛	C11H12O4	208.211	6.49	Phenols And Its Derivatives	酚类及其衍生物	"4206-58-0"	16190000	4071000	3686000
Com_1789_pos	Indole	吲哚	C8H7N	117.148	4.87	Indoles and derivatives	吲哚及其衍生物	"120-72-9"	15480000	44640000	41860000
Com_1783_pos	2-(Dimethylamino)Guanosine	二甲基鸟苷	C12H17N5O5	311.294	4.57	Nucleotide And Its Derivates	核苷酸及其衍生物	"2140-67-2"	15370000	7072000	6734000
Com_1193_pos	Petunidin 3-O-rutinoside	哌丁啶3-O-芸香苷	C28H33O16	625.56	6.78	Anthocyanins	花青素		15290000	23270000	23210000
Com_1099_pos	14,15-Dehydrocrepenynic acid	14,15-脱氢还阳参油酸	C18H28O2	276.414	12.15	Fatty Acyls	脂肪酰类	"4154-44-3"	15040000	9841000	7784000
Com_174_neg	D-Panthotenate	D-泛酸	C9H17NO5	219.235	4.59	Amino Acid And Derivatives	氨基酸及其衍生物	"79-83-4"	14520000	6381000	6570000
Com_342_neg	Trifolin	三叶豆甙	C21H20O11	448.101	6.62	Flavonoids	类黄酮	"23627-87-4"	14460000	3198000	3224000
Com_136_neg	3-Hydroxybutyrate	3-羟基丁酸	C4H8O3	104.104	1.13	Organic Acid And Its Derivatives	有机酸及其衍生物	"300-85-6"	14120000	6967000	6499000
Com_97_neg	Naringin	柚皮苷水合物	C27H32O14	580.53	6.979	Flavanones	黄烷酮	"10236-47-2"	13990000	324500000	343900000
Com_1678_pos	2-Methoxyhexadecanoate	棕榈酸甲酯	C17H34O2	270.451	0.97	Fatty Acyls	脂肪酰类	"112-39-0"	13750000	28300000	28310000
Com_537_neg	D-Xylulose	D-木酮糖	C5H10O5	150.13	1.01	Carbohydrates And Its Derivatives	糖类及其衍生物	"551-84-8"	13710000	5653000	5672000
Com_974_pos	16alpha-Hydroxydehydrotrametenolic acid	16α-羟基松苓新酸	C30H46O4	470.693	9.95	Terpenoids	萜类	"176390-66-2"	13535131	4306000	3970000
Com_1507_pos	Lappaconitine	刺乌头碱	C32H44N2O8	584.7	7.37	Terpenoids	萜类	"32854-75-4"	13186666	3542000	3203000
Com_1160_pos	6-Deoxyfagomine	6-脱氧荞麦碱	C6H13NO2	131.095	2.06	Alkaloids and derivatives	生物碱及其衍生物	"197449-09-5"	13140000	8160000	7716000
Com_515_neg	Eucommiol	杜仲醇	C9H16O4	188.105	7.31	Terpenoids	萜类	"55930-44-4"	13070000	4207000	4287000
Com_734_neg	3-O-p-Coumaroylquinic acid	3-O-对香豆酰奎宁酸	C16H18O8	338.1	5.92	Phenolic acids	酚酸类	"87099-71-6"	12740000	11340000	10590000
Com_394_neg	Lonicerin	忍冬苷	C27H30O15	594.526	6.73	Flavonoids	类黄酮	"20633-84-5"	12600000	108900000	119500000
Com_1021_pos	L-Pipecolate	L-哌啶酸	C6H11NO2	129.16	1.049	Amino Acid And Derivatives	氨基酸及其衍生物	"3105-95-1"	12530000	52460000	66050000
Com_795_pos	Vitamin B2	核黄素B2	C17H20N4O6	376.364	5.94	Vitamins	维生素	"83-88-5"	12450000	6713000	7270000
Com_510_neg	L-threo-3-Methylaspartate	L-苏式-3-甲基天冬氨酸	C5H9NO4	147.053	0.87	Amino Acid And Derivatives	氨基酸及其衍生物	"6061-13-8"	12330000	3681000	3897000
Com_1560_pos	Kaempferol-3-O-rutinoside	山柰酚-3-O-芸香糖苷	C27H30O15	594.526	6.51	Flavonoids	类黄酮	"17650-84-9"	12240000	149900000	140000000
Com_1445_pos	Apo-13-zeaxanthinone	载脂蛋白-13-玉米黄质酮	C18H26O2	274.4	8.84	Ketones	酮类		12210000	4120000	3976000
Com_1405_pos	7-Methoxycoumarin	甲氧基香豆素	C10H8O3	176.17	8.68	Coumarins and derivatives	香豆素及其衍生物	"531-59-9"	12050000	3991000	3425000
Com_736_neg	2,6-Dimethyl-7-octene-2,3,6-triol	2,6-二甲基-7-辛烯-2,3,6-三醇	C10H20O3	188.141	7.31	Alcohols and polyols	醇类和多元醇类	"73815-21-1"	12030000	3800000	3833000
Com_1722_pos	Trimethylamine N-oxide	氧化三甲胺	C3H9NO	75.11	0.85	Amines	胺类	"1184-78-7"	12000000	7272000	6889000
Com_1220_pos	Hypoxanthine	次黄嘌呤	C5H4N4O	136.11	1.509	Purines and purine derivatives	嘌呤及其衍生物	"68-94-0"	11960000	2984000	3328000
Com_1152_pos	4-Aminobutyric acid	γ-氨基丁酸	C4H9NO2	103.12	0.864	Amino Acid And Derivatives	氨基酸及其衍生物	"56-12-2"	11940000	19910000	17630000
Com_1241_pos	L-Valine	L-缬氨酸	C5H11NO2	117.146	1.2	Amino Acid And Derivatives	氨基酸及其衍生物	"72-18-4"	11790000	5679000	4966000
Com_1715_pos	Skimmin	茵芋苷	C15H16O8	324.283	5.34	Coumarins and derivatives	香豆素及其衍生物	"93-39-0"	11780000	5548000	6305000
Com_1316_pos	alpha-Ionone	α-紫罗兰酮	C13H20O	192.297	1.86	Terpenoids	萜类	"127-41-3"	11750000	11590000	11040000
Com_1320_pos	Phenylethanolamine	苯基乙醇胺	C8H11NO	137.084	2	Amines	胺类	"7568-93-6"	11720000	4440000	4239000
Com_877_pos	4-MethoxycinnaMaldehyde	4-甲氧基肉桂醛	C10H10O2	162.068	9.19	Phenolic acids	酚酸类	"1963-36-6"	11487900	18920000	16890000
Com_517_neg	2-Hydroxycinnamate	2-羟基肉桂酸	C9H8O3	164.047	6.48	Cinnamic acids and derivatives	肉桂酸及其衍生物	"583-17-5"	11470000	32450000	32290000
Com_1020_pos	Casticin	蔓荆子黄素	C19H18O8	374.341	10.374	Flavones and Flavonols	黄酮和黄酮醇	"479-91-4"	11356790	14450000	14240000
Com_1633_pos	4-Methylumbelliferone	4-甲基伞形酮	C10H8O3	176.17	8.691	Phenylpropanoids	苯丙素类	"90-33-5"	11320000	3863000	3451000
Com_378_neg	Salicylic acid O-glucoside	水杨酰己糖苷	C13H16O8	300.1	4.14	Phytohormones	植物激素	"10366-91-3"	11290000	35820000	39670000
Com_1441_pos	Imidazole-4-acetate	咪唑-4-乙酸	C5H6N2O2	126.1	0.96	Organoheterocyclic compounds	有机杂环化合物	"645-65-8"	11270000	23860000	22750000
Com_50_neg	Isorhamnetin O-acetyl-hexoside	异鼠李素 O-乙酰己糖苷	C24H24O13	520.1	7.23	Flavonoids	类黄酮		11240000	2694000	2496000
Com_1236_pos	N-(2-Hydroxyethyl)iminodiacetic acid	N-羟乙基亚胺二乙酸	C6H11NO5	177.155	1.02	Organic Acid And Its Derivatives	有机酸及其衍生物	"93-62-9"	11200000	12290000	10630000
Com_1492_pos	1,2-Benzenedicarboxylic acid	邻苯二甲酸	C8H6O4	166.131	4.11	Benzoic acids and derivatives	苯甲酸及其衍生物	"88-99-3"	10940000	9928000	9547000
Com_1289_pos	H-Abu-OH	L-α-氨基丁酸	C4H9NO2	103.12	0.947	Amino Acid And Derivatives	氨基酸及其衍生物	"1492-24-6"	10910000	19920000	17850000
Com_1588_pos	2-Deoxy-D-galactose	2-脱氧-D-半乳糖	C6H12O5	164.156	0.69	Carbohydrates And Its Derivatives	糖类及其衍生物	"1949-89-9"	10870000	8335000	8101000
Com_406_neg	beta-L-Arabinose	阿拉伯糖	C5H10O5	150.13	0.9	Carbohydrates And Its Derivatives	糖类及其衍生物	"5328-37-0"	10860000	5175000	5032000
Com_495_neg	Kaempferol 3-O-robinobioside	山奈酚 3-O-洋槐糖苷	C27H30O15	594.159	6.55	Flavones and Flavonols	黄酮和黄酮醇	"17297-56-2"	10800000	79510000	92390000
Com_827_pos	Aspartic Acid	天冬氨酸	C4H7NO4	133.103	0.84	Amino Acid And Derivatives	氨基酸及其衍生物	"6899-03-2"	10540000	16520000	14070000
Com_1311_pos	Luteolin-4'-O-glucoside	木犀草素-4'-O-葡萄糖苷	C21H20O11	448.101	6.8	Flavonoids	类黄酮	"6920-38-3"	10490000	18380000	19570000
Com_555_neg	4-Hydroxy-2-Oxoglutaric Acid	4-羟基-2-酮戊二酸	C5H6O6	162.098	0.7	Organic Acid And Its Derivatives	有机酸及其衍生物	"1187-99-1"	10470000	7623000	6678000
Com_1080_pos	L-aspartic Acid	L-天冬氨酸	C4H7NO4	133.1	0.86	Amino Acid And Derivatives	氨基酸及其衍生物	"56-84-8"	10470000	16660000	15610000
Com_581_neg	Heptadecanoic acid	十七烷酸	C17H34O2	270.256	10.53	Fatty Acyls	脂肪酰类	"506-12-7"	10415067	15950000	16510000
Com_741_neg	Sebacic acid	癸二酸	C10H18O4	202.248	8.111	Organic Acid And Its Derivatives	有机酸及其衍生物	"111-20-6"	10390000	2911000	2923000
Com_1187_pos	C-pentosyl-chrysoeriol O-hexoside	C-戊糖基-金圣草素 O-己糖苷	C27H30O15	594.526	6.04	Flavonoids	类黄酮		10389370	7154000	7232000
Com_968_pos	1-O-Feruloyl quinic acid	1-O-阿魏酰奎宁酸	C17H20O9	368.1	6.23	Alcohols and polyols	醇类和多元醇类		10110000	15020000	13450000
Com_1181_pos	3,7-Dimethoxykaempferol-C-glucoside	3,7-二甲氧基山奈酚-C-葡萄糖苷	C23H24O11	476.2	6.45	Flavonoids	类黄酮		10082725	3507000	3256000
Com_1030_pos	Chrysoeriol O-sinapoylhexoside	金圣草黄素 O-芥子酰己糖苷	C33H32O15	668	7.8	Flavonoids	类黄酮		10082725	3153000	3184000
Com_1133_pos	beta-Alanine methyl ester hydrochloride	3-氨基丙酸甲酯盐酸盐	C4H10ClNO2	139.58	0.98	Amino Acid And Derivatives	氨基酸及其衍生物	"3196-73-4"	10040000	11700000	11180000
Com_375_neg	Syringic acid O-glucoside	丁香酰己糖苷	C15H20O10	360.1	4.82	Flavonoids	类黄酮		9762000	3053000	3051000
Com_1131_pos	LysoPC 18:2	溶血磷脂酰胆碱 18:2	C26H50NO7P	519.3	12.14	Phospholipid	磷脂		9735981	16600000	13450000
Com_56_neg	Cyanidin O-acetylhexoside	矢车菊素 O-乙酰基己糖苷	C23H22O12	490.1	7.12	Anthocyanins	花青素		9727000	2353000	2433000
Com_1154_pos	Uracil	尿嘧啶	C4H4N2O2	112.09	1.47	Nucleotide And Its Derivates	核苷酸及其衍生物	"66-22-8"	9524000	8200000	5740000
Com_1741_pos	Levistilide A	欧当归内酯A	C24H28O4	380.48	13.752	Terpenoids	萜类	"88182-33-6"	9450141	4254000	4059000
Com_822_pos	Kaempferol-3-gentiobioside	山柰酚-3-O-龙胆二糖苷	C27H30O16	610.525	6.28	Flavonoids	类黄酮	"22149-35-5"	9371000	2062000	1877000
Com_582_neg	Fumaric Acid	延胡索酸	C4H4O4	116.072	1.11	Tca Cycle	三羧酸循环	"110-17-8"	9319000	5613000	5678000
Com_352_neg	Dl-Glutamic acid	DL-谷氨酸	C5H9NO4	147.129	0.87	Amino Acid And Derivatives	氨基酸及其衍生物	"617-65-2"	9313000	2960000	2933000
Com_1698_pos	18-Nor-4,15-dihydroxyabieta-8,11,13-trien-7-one	18-去甲-4,15-二羟基阿松香-8,11,13-三烯-7-酮	C19H26O3	302.408	7.25	Terpene	萜烯	"213329-46-5"	9230280	3717000	3121000
Com_2_neg	Naringenin chalcone	柚皮素查耳酮	C15H12O5	272.253	8.518	Chalcones and dihydrochalcones	查尔酮和二氢查尔酮	"73692-50-9"	9171000	136400000	132900000
Com_1215_pos	L-Dihydroorotic acid	L-氢化乳清酸	C5H6N2O4	158.112	0.92	Amino Acid And Derivatives	氨基酸及其衍生物	"5988-19-2"	9074000	34280000	32140000
Com_883_pos	3,7-Di-O-methylquercetin	3,7-二-O-甲基槲皮素	C17H14O7	330.074	9.02	Flavonoids	类黄酮	"2068-02-2"	9061000	79800000	76260000
Com_489_neg	Indole-5-carboxylic acid	吲哚-5-甲酸	C9H7NO2	161.048	0.69	Indoles and derivatives	吲哚及其衍生物	"1670-81-1"	9027000	6595000	6951000
Com_710_neg	5-oxoproline	5-氧化脯氨酸	C5H7NO3	129.043	1.63	Amino Acid And Derivatives	氨基酸及其衍生物	"149-87-1"	9005000	3901000	4613000
Com_214_neg	p-Hydroxy-cinnamic acid	对羟基肉桂酸	C9H8O3	164.16	6.531	Cinnamic acids and derivatives	肉桂酸及其衍生物	"7400-08-0"	8853000	25030000	24170000
Com_320_neg	D-2-Hydroxypentanedioic acid	2-羟基-D-谷氨酸	C5H6Na2O5	192.078	1.49	Amino Acid And Derivatives	氨基酸及其衍生物	"103404-90-6"	8805000	7137000	6961000
Com_816_pos	Nodakenetin	紫花前胡苷元	C14H14O4	246.262	6.82	Coumarins and derivatives	香豆素及其衍生物	"495-32-9"	8744494	13320000	12690000
Com_1304_pos	Hypoxanthine-9-beta-D-Arabinofuranoside	阿糖肌苷	C10H12N4O5	268.226	2.58	Nucleotide And Its Derivates	核苷酸及其衍生物	"7013-16-3"	8743000	90220000	82340000
Com_815_pos	Decursinol	紫花前胡醇	C14H14O4	246.263	6.82	Coumarins and derivatives	香豆素及其衍生物	"23458-02-8"	8730635	10520000	10260000
Com_745_neg	Kaji-ichigoside F1	刺梨苷	C36H58O10	650.85	6.71	Terpene	萜烯	"95298-47-8"	8641040	7396000	8168000
Com_356_neg	alpha-Amino-beta-(3-indolyl)-propionic acid	DL-色氨酸	C11H12N2O2	204.225	4.91	Amino Acid And Derivatives	氨基酸及其衍生物	"54-12-6"	8607000	15540000	16460000
Com_1515_pos	Chrysoeriol 7-O-hexoside	金圣草黄素 7-邻己糖苷	C22H22O11	448.4	7.2	Flavonoids	类黄酮		8516000	87740000	83700000
Com_296_neg	Crocetin	西红花酸	C20H24O4	328.408	8.79	Terpenoids	萜类	"27876-94-4"	8425000	2654000	2634000
Com_328_neg	L-Pyroglutamic acid	焦谷氨酸	C5H7NO3	129.11	1.689	Amino Acid And Derivatives	氨基酸及其衍生物	"98-79-3"	8361000	3687000	4196000
Com_610_neg	Lysionotin	岩豆素	C18H16O7	344.32	10.69	Flavonoids	类黄酮	"152743-19-6"	8312080	3880000	4158000
Com_1032_pos	Chrysoeriol O-hexosyl-O-rutinoside	金圣草黄素 O-己糖基-O-芸香糖苷	C34H42O20	770.1	6.28	Flavonoids	类黄酮		8289580	3653000	3487000
Com_514_neg	Eicosadienoic acid	二十碳二烯酸	C20H36O2	308.272	6.32	Fatty Acyls	脂肪酰类	"5598-38-9"	8287000	2353000	4967000
Com_1368_pos	4-Acetamidobutyric Acid	4-乙酰氨基丁酸	C6H11NO3	145.156	1.03	Amino Acid And Derivatives	氨基酸及其衍生物	"3025-96-5"	8218000	4236000	4624000
Com_1639_pos	Neotuberostemonine	新对叶百部碱	C22H33NO4	375.508	11.1	Alkaloids and derivatives	生物碱及其衍生物	"143120-46-1"	8109000	6501000	5157000
Com_902_pos	Hirsuteine	去氢毛钩藤碱	C22H26N2O3	366.46	4.86	Alkaloids and derivatives	生物碱及其衍生物	"35467-43-7"	8054000	7744000	6758000
Com_423_neg	4-Hydroxyisoleucine	4-羟基-L-异亮氨酸	C6H13NO3	147.172	1.038	Amino Acid And Derivatives	氨基酸及其衍生物	"781658-23-9"	7999000	2180000	2330000
Com_945_pos	Narcissoside	水仙苷	C28H32O16	624.544	6.825	Flavonoids	类黄酮	"604-80-8"	7962000	37790000	35160000
Com_757_pos	L-Saccharopine	L-酵母氨酸	C11H20N2O6	276.286	1.03	Amino Acid And Derivatives	氨基酸及其衍生物	"997-68-2"	7948000	8276000	8148000
Com_943_pos	Ligustilide	藁本内酯	C12H14O2	190.238	11.865	Organoheterocyclic compounds	有机杂环化合物	"4431-01-0"	7906000	293200000	274200000
Com_1125_pos	Gallocatechin-gallocatechin	二没食子儿茶素	C30H26O14	610.2	6.24	Flavonoids	类黄酮		7867000	1854000	1953000
Com_1575_pos	Sattabacin		C13H18O2	206.28	6.12	Benzene and substituted derivatives	苯及其取代衍生物	"169272-84-8"	7776000	11490000	11100000
Com_911_pos	Dl-3-Hydroxynorvaline	DL-3-羟基正缬氨酸	C5H11NO3	133.146	0.85	Amino Acid And Derivatives	氨基酸及其衍生物	"2280-42-4"	7774000	13950000	12870000
Com_1342_pos	Phloretin	根皮素	C15H14O5	274.27	8.598	Chalcones and dihydrochalcones	查尔酮和二氢查尔酮	"60-82-2"	7572000	2769000	2318000
Com_1691_pos	Cyanidin O-rutinoside	矢车菊素 O-芸香糖苷	C27H31O15	595.52	6.66	Anthocyanins	花青素		7522000	153600000	145100000
Com_812_pos	Isopsoralen	异补骨脂素	C11H6O3	186.16	7.927	Coumarins and derivatives	香豆素及其衍生物	"523-50-2"	7508480	4861000	4261000
Com_1725_pos	L-Methionine	L-蛋氨酸	C5H11NO2S	149.212	1.38	Amino Acid And Derivatives	氨基酸及其衍生物	"63-68-3"	7476966	7618000	9302000
Com_383_neg	p-Coumaric Acid	4-羟基肉桂酸	C9H8O3	164.16	6.549	Cinnamic acids and derivatives	肉桂酸及其衍生物	"501-98-4"	7307000	23250000	24620000
Com_295_neg	Esculin	秦皮甲素	C15H16O9	340.28	5.145	Coumarins and derivatives	香豆素及其衍生物	"531-75-9"	7084000	7867000	8260000
Com_1509_pos	gamma-Glu-Leu	谷氨酰-L-亮氨酸	C11H20N2O5	260.287	5.17	Amino Acid And Derivatives	氨基酸及其衍生物	"2566-39-4"	7008000	2427000	2199000
Com_98_neg	Glucosylvitexin	牡荆素葡萄糖苷	C27H30O15	594.526	6.25	Flavonoids	类黄酮	"76135-82-5"	6978236	7112000	7346000
Com_1039_pos	Pyridoxine O-glucoside	吡哆醇 O-葡萄糖苷	C14H21NO8	331.323	1.68	Vitamins	维生素		6867000	10690000	12440000
Com_1420_pos	Kynurenic acid	犬尿酸	C10H7NO3	189.17	5.296	Quinolines and derivatives	喹啉及其衍生物	"492-27-3"	6767000	2840000	2701000
Com_1063_pos	Glucosamine sulfate	氨基葡萄糖硫酸盐	C6H15NO9S	277.25	0.79	Carbohydrates And Its Derivatives	糖类及其衍生物	"29031-19-4"	6706000	4877000	5337000
Com_787_pos	Chrysoeriol 5-O-hexoside	金圣草黄素 5-O-己糖苷	C22H22O11	462.404	7.18	Flavonoids	类黄酮		6385000	61820000	60830000
Com_1482_pos	Homoplantaginin	高车前苷	C22H22O11	462.403	7.186	Flavonoids	类黄酮	"17680-84-1"	6383000	68010000	62580000
Com_575_neg	Glutaric Acid	戊二酸	C5H8O4	132.115	0.7	Organic Acid And Its Derivatives	有机酸及其衍生物	"110-94-1"	6255000	4134000	3821000
Com_835_pos	Homoserine	同型丝氨酸	C4H9NO3	119.119	0.9	Amino Acid And Derivatives	氨基酸及其衍生物	"1927-25-9"	6253000	9027000	8909000
Com_1440_pos	L-Homocystine	L-高胱氨酸	C8H16N2O4S2	268.354	2.5	Amino Acid And Derivatives	氨基酸及其衍生物	"626-72-2"	6235000	64530000	59040000
Com_1355_pos	Paeonol	丹皮酚	C9H10O3	166.177	4.08	Ketones	酮类	"552-41-0"	6221000	5847000	5366000
Com_191_neg	2,4-Dihydroxybenzoic acid	2,4-二羟基苯甲酸	C7H6O4	154.12	4.623	Organic Acid And Its Derivatives	有机酸及其衍生物	"89-86-1"	6202000	6398000	6396000
Com_1697_pos	Sophoricoside	槐角苷	C21H20O10	432.38	7.038	Isoflavonoids	异黄酮	"152-95-4"	6165000	133300000	117800000
Com_1486_pos	6-Hydroxy-4-methylcoumarin	6-羟基-4-甲基香豆素	C10H8O3	176.169	7.104	Coumarins and derivatives	香豆素及其衍生物	"2373-31-1"	6118000	2450000	2061000
Com_884_pos	1,4-dihydro-1-Methyl-4-oxo-3-pyridinecarboxamide	1,4-二氢-1-甲基-4-氧代-3-吡啶甲酰胺	C7H8N2O2	152.059	1.66	Pyridines and derivatives	吡啶及其衍生物	"769-49-3"	6087000	2896000	2751000
Com_1250_pos	Dihydroactindiolide	二氢猕猴桃(醇酸)内酯	C11H16O2	180.243	5.51	Lactones	内酯	"17092-92-1"	6060000	4908000	4584000
Com_1527_pos	Quinone	苯醌	C6H4O2	108.021	0.93	Carbonyl compounds	醛酮类	"106-51-4"	6046000	14910000	14240000
Com_466_neg	9-KODE	13-酮十八碳二烯酸	C18H30O3	294.2	12.07	Fatty Acyls	脂肪酰类	"54232-59-6"	6045000	2384000	2180000
Com_1764_pos	Sinapinic Acid	芥子酸	C11H12O5	224.21	6.865	Cinnamic acids and derivatives	肉桂酸及其衍生物	"530-59-6"	6044750	2487000	2101000
Com_126_neg	Butin	紫铆素	C15H12O5	272.069	8.61	Flavanones	黄烷酮	"492-14-8"	6043000	91030000	93980000
Com_281_neg	13(S)-HOTrE	13-羟基十八碳三烯酸	C18H30O3	294.2	12.07	Fatty Acyls	脂肪酰类	"87984-82-5"	6017000	2266000	2179000
Com_960_pos	Psoralen	补骨脂素	C11H6O3	186.16	9.042	Coumarins and derivatives	香豆素及其衍生物	"66-97-7"	5989326	12110000	10020000
Com_567_neg	L-Asparagine	L-天冬门酰胺	C4H8N2O3	132.12	0.843	Amino Acid And Derivatives	氨基酸及其衍生物	"70-47-3"	5975000	28680000	30100000
Com_814_pos	PolygalaxanthoneⅥ	远志口山酮Ⅵ	C23H26O12	494.452	7.14	Ketones	酮类		5958225	2738000	2550000
Com_789_pos	Sarcosine	肌氨酸	C3H7NO2	89.093	0.9	Amino Acid And Derivatives	氨基酸及其衍生物	"107-97-1"	5936000	18290000	19880000
Com_1238_pos	Methional	3-甲硫基丙醛	C4H8OS	104.171	0.84	Carbonyl compounds	醛酮类	"3268-49-3"	5935000	11330000	9848000
Com_1231_pos	Turanose	松二糖	C12H21O11Na	364.078	0.95	Carbohydrates And Its Derivatives	糖类及其衍生物	"547-25-1"	5882000	43180000	51160000
Com_518_neg	Dimethylmalonic acid	二甲基丙二酸	C5H8O4	132.042	0.67	Organic Acid And Its Derivatives	有机酸及其衍生物	"595-46-0"	5874000	4510000	3714000
Com_1115_pos	beta-Ionone	β-紫罗兰酮	C13H20O	192.297	8.5	Terpenoids	萜类	"14901-07-6"	5824000	2010000	2012000
Com_887_pos	Melezitose	D(+)-松三糖	C18H32O16	504.44	0.998	Carbohydrates And Its Derivatives	糖类及其衍生物	"597-12-6"	5809000	94290000	85420000
Com_801_pos	Schaftoside	夏佛塔苷	C26H28O14	564.492	6.074	Flavones and Flavonols	黄酮和黄酮醇	"51938-32-0"	5781000	854200	1164000
Com_266_neg	P-Coumaryl Alcohol	对-香豆醇	C9H10O2	150.174	1.04	Phenylpropanoids and polyketides	苯丙素和聚酮化合物	"3690-05-9"	5777000	2466000	2344000
Com_1710_pos	senkyunolide O	洋川芎内酯O	C24H28O4	380.484	13.58	Organoheterocyclic compounds	有机杂环化合物	"142797-35-1"	5755974	3724000	3221000
Com_1121_pos	Pyridoxine	吡哆醇	C8H11NO3	169.178	1.53	Vitamins	维生素	"65-23-6"	5705000	3344000	3441000
Com_550_neg	2,6-Dihydroxypurine	黄嘌呤	C5H4N4O2	152.11	1.714	Nucleotide And Its Derivates	核苷酸及其衍生物	"69-89-6"	5674000	1832000	1872000
Com_1695_pos	Obacunone	黄柏酮	C26H30O7	454.51	10.997	Terpenoids	萜类	"751-03-1"	5665500	2790000	3038000
Com_1709_pos	Pectolinarigenin	柳穿鱼黄素	C17H14O6	314.295	10.78	Flavones and Flavonols	黄酮和黄酮醇	"520-12-7"	5630000	1593000	1499000
Com_1224_pos	D-2-Aminobutyric acid	D-2-氨基丁酸	C4H9NO2	103.12	0.947	Organic Acid And Its Derivatives	有机酸及其衍生物	"2623-91-8"	5585000	9868000	8604000
Com_480_neg	Chicoric acid	菊苣酸	C22H18O12	474.371	5.57	Organic Acid And Its Derivatives	有机酸及其衍生物	"70831-56-0"	5544000	1060000	1223000
Com_1713_pos	vasicine	鸭嘴花碱	C11H12N2O	188.229	4.86	Alkaloids and derivatives	生物碱及其衍生物	"6159-55-3"	5395000	14560000	13880000
Com_1102_pos	Diosgenin	薯蓣皂素	C27H42O3	414.621	11.39	Terpene	萜烯	"512-04-9"	5366000	23020000	18090000
Com_177_neg	Myristoleic acid	豆蔻酸	C14H26O2	226	8.46	Fatty Acyls	脂肪酰类	"544-64-9"	5278000	1507000	1509000
Com_446_neg	6'-O-Feruloyl-D-sucrose	6'-O-阿魏酰-D-蔗糖	C22H30O14	518.164	0.69	Phenolic acids	酚酸类	"118230-77-6"	5270000	3583000	3650000
Com_1347_pos	Pratensein-7-O-glucoside	红车轴草素-7-O-D-葡萄糖苷	C22H22O11	462.41	6.86	Isoflavonoids	异黄酮	"36191-03-4"	5264000	35040000	38040000
Com_164_neg	Quercetin 3-O-sophoroside	白麻苷	C27H30O17	626.524	6.13	Alkaloids and derivatives	生物碱及其衍生物	"18609-17-1"	5252000	27010000	29750000
Com_247_neg	Guanine	鸟嘌呤	C5H5N5O	151.126	2.77	Purines and purine derivatives	嘌呤及其衍生物	"73-40-5"	5120000	6847000	6755000
Com_792_pos	R-Aminobutyrate	R-3-氨基丁酸	C4H9NO2	103.12	0.91	Organic Acid And Its Derivatives	有机酸及其衍生物	"3775-73-3"	5015000	6340000	5261000
Com_145_neg	N-Acetylalanine	N-乙酰-L-丙氨酸	C5H9NO3	131.13	2.15	Amino Acid And Derivatives	氨基酸及其衍生物	"97-69-8"	4977000	8312000	8640000
Com_1632_pos	6-Gingerol	6-姜酚	C17H26O4	294.39	10.748	Phenols And Its Derivatives	酚类及其衍生物	"23513-14-6"	4929000	4012000	3323000
Com_454_neg	D-Galacturonic acid	D-(+)-半乳糖醛酸	C6H10O7	194.139	1.56	Carbohydrates And Its Derivatives	糖类及其衍生物	"685-73-4"	4893000	4561000	5229000
Com_5_neg	Choline bitartrate	酒石酸氢胆碱	C9H19NO7	253.25	0.97	Amines	胺类	"87-67-2"	4871000	3197000	3276000
Com_17_neg	9(S)-HOTrE	9-羟基十八碳三烯酸	C18H30O3	294.429	12.07	Fatty Acyls	脂肪酰类	"89886-42-0"	4858000	1860000	1665000
Com_584_neg	Abscisic Acid	(+)-脱落酸	C15H20O4	264.32	8.13	Phytohormones	植物激素	"21293-29-8"	4780000	8711000	9138000
Com_1229_pos	L-2-Aminoadipic acid	L-2-氨基己二酸	C6H11NO4	161.069	0.93	Amino Acid And Derivatives	氨基酸及其衍生物	"542-32-5"	4674000	4342000	3083000
Com_15_neg	Isoschaftoside	异夏佛塔苷	C26H28O14	564.499	6.03	Flavones and Flavonols	黄酮和黄酮醇	"52012-29-0"	4508000	1016000	1038000
Com_234_neg	1-O-p-Coumaroyl quinic acid	1-O-对-香豆酰奎尼酸	C16H18O8	338.1	5.95	Alcohols and polyols	醇类和多元醇类		4490000	7532000	7835000
Com_137_neg	3-Hydroxyanthranilic Acid	3-羟基-2-氨基苯甲酸	C7H7NO3	153.135	4.45	Benzoic acids and derivatives	苯甲酸及其衍生物	"548-93-6"	4484000	13460000	12900000
Com_915_pos	2-Pyrrolidinone	2-吡咯烷酮	C4H7NO	85.1	2.369	Organoheterocyclic compounds	有机杂环化合物	"616-45-5"	4454000	3767000	3014000
Com_242_neg	Ayapin	泽兰内酯	C11H8O3	188.041	7.3	Coumarins and derivatives	香豆素及其衍生物	"494-56-4"	4447000	1294000	1310000
Com_1401_pos	Avicularin	扁蓄苷	C20H18O11	434.085	6.78	Flavonoids	类黄酮	"572-30-5"	4445000	719200	1285000
Com_1422_pos	beta-Nicotyrine	β-二烯烟碱	C10H10N2	158.2	4.91	Alkaloids and derivatives	生物碱及其衍生物	"487-19-4"	4389000	11310000	10250000
Com_1088_pos	Isohyperoside	异金丝桃苷	C21H20O12	464.095	5.91	Flavones and Flavonols	黄酮和黄酮醇	"35589-21-0"	4349639	10520000	8775000
Com_1779_pos	Nobiletin	川陈皮素	C21H22O8	402.39	10.518	Flavones and Flavonols	黄酮和黄酮醇	"478-01-3"	4326000	409200000	416000000
Com_1151_pos	Naringerin	柚皮素(5,7,4')	C15H12O5	272.253	8.64	Flavanones	黄烷酮	"67604-48-2"	4304000	94760000	87280000
Com_8_neg	3-Methyladipic acid	3-甲基己二酸	C7H12O4	160.17	5.747	Fatty Acyls	脂肪酰类	"3058-01-3"	4298000	1030000	1116000
Com_1447_pos	Apigenin O-malonylhexoside	芹菜素 O-丙二酰己糖苷	C24H22O13	518.431	7.46	Flavonoids	类黄酮		4293000	1228000	1174000
Com_1260_pos	pteroside A	蕨菜甙A	C21H30O8	410.464	5.73	Carbohydrates And Its Derivatives	糖类及其衍生物	"35910-15-7"	4134000	972400	813100
Com_1123_pos	Quercetin-3,4'-O-di-beta-glucopyranoside	槲皮素吡喃葡萄糖苷	C27H30O17	626.52	5.39	Flavones and Flavonols	黄酮和黄酮醇		4112000	5412000	5203000
Com_165_neg	O-p-coumaroyl-O-salicyloyl quinic acid	对香豆酰基 O-水杨酰奎尼酸	C23H22O10	458.1	5.55	Cinnamic acids and derivatives	肉桂酸及其衍生物		4094000	1040000	1129000
Com_718_neg	p-Coumaric acid-4-O-glucoside	对香豆酸-4-O-葡萄糖苷	C15H18O8	326.1	5.55	Phenolic acids	酚酸类	"117405-48-8"	3984000	6298000	6568000
Com_896_pos	Scopolin	东莨菪苷	C16H18O9	354.096	5.51	Phenylpropanoids	苯丙素类	"531-44-2"	3958245	1624000	1549000
Com_1693_pos	Phloretic acid	对羟基苯丙酸	C9H10O3	166.17	6.405	Phenylpropanoids and polyketides	苯丙素和聚酮化合物	"501-97-3"	3930000	1151000	1127000
Com_199_neg	Tartaric acid	L-(+)-酒石酸	C4H6O6	150.09	1.008	Organic Acid And Its Derivatives	有机酸及其衍生物	"87-69-4"	3928000	2360000	2216000
Com_885_pos	Peonidin O-hexoside	芍药花青素 O-己糖苷	C22H23O11	463.123	6.8	Anthocyanins	花青素		3911000	34160000	28420000
Com_456_neg	12-OH-JA-Ile-1	12-羟基茉莉单酰基-L-异亮氨酸	C18H29NO5	339.4	7.8	Phytohormones	植物激素		3874000	884400	946400
Com_1646_pos	3-Hydroxyhippuric Acid	3-羟基马尿酸	C9H9NO4	195.172	2.67	Organic Acid And Its Derivatives	有机酸及其衍生物	"1637-75-8"	3827000	2743000	2511000
Com_934_pos	N8-Acetylspermidine	N8-乙酰基亚精胺	C9H23Cl2N3O	260.204	1.06	Organic Acid And Its Derivatives	有机酸及其衍生物	"34450-15-2"	3820705	1739000	1618000
Com_1025_pos	4-Pyridoxate	4-吡哆酸	C8H9NO4	183.161	2.91	Pyridines and derivatives	吡啶及其衍生物	"82-82-6"	3795000	1953000	1718000
Com_594_neg	Vitexin	牡荆素	C21H20O10	432.38	6.559	Flavones and Flavonols	黄酮和黄酮醇	"3681-93-4"	3765000	40900000	43300000
Com_971_pos	Histidinol	组氨醇	C6H11N3O	141.1	0.72	Amines	胺类	"4836-52-6"	3743000	3100000	2879000
Com_88_neg	Isoacteoside	异类叶升麻苷	C29H36O15	624.595	6.44	Cinnamic acids and derivatives	肉桂酸及其衍生物	"61303-13-7"	3726000	822800	812400
Com_1726_pos	Alpha-Linolenic acid	α-亚麻酸	C18H30O2	278.435	12.64	Fatty Acyls	脂肪酰类	"463-40-1"	3719000	44670000	38640000
Com_1083_pos	L-Hydroxyproline	L-羟脯氨酸	C5H9NO3	131.13	0.88	Amino Acid And Derivatives	氨基酸及其衍生物	"51-35-4"	3681000	6073000	5870000
Com_1079_pos	L-Alanine	L-丙氨酸	C3H7NO2	89.09	0.86	Amino Acid And Derivatives	氨基酸及其衍生物	"56-41-7"	3650000	9923000	9887000
Com_1378_pos	Glucosamine	D-氨基葡萄糖	C6H13NO5	179.173	0.793	Carbohydrates And Its Derivatives	糖类及其衍生物	"3416-24-8"	3639000	3357000	3327000
Com_391_neg	Naringenin	柚皮素	C15H12O5	272.25	8.683	Flavanones	黄烷酮	"480-41-1"	3621000	57940000	61840000
Com_828_pos	Ala-gly	L-丙氨酰甘氨酸	C5H10N2O3	146.144	0.84	Amino Acid And Derivatives	氨基酸及其衍生物	"687-69-4"	3547000	10510000	9269000
Com_474_neg	D-Tagatose	D-塔格糖	C6H12O6	180.156	0.96	Carbohydrates And Its Derivatives	糖类及其衍生物	"87-81-0"	3516000	11140000	11600000
Com_1721_pos	1-Aminocyclopropanecarboxylic acid	1-氨基环丙烷-1-羧酸酯	C4H7NO2	101.1	0.894	Phytohormones	植物激素	"22059-21-8"	3506000	4387000	4342000
Com_109_neg	Isoscopoletin	异东莨菪内酯	C10H8O4	192.168	6.759	Phenylpropanoids	苯丙素类	"776-86-3"	3499000	2676000	2712000
Com_330_neg	Lactobionic acid	乳糖酸	C12H22O12	358.3	0.91	Carbohydrates And Its Derivatives	糖类及其衍生物	"96-82-2"	3479000	1948000	2236000
Com_1599_pos	Tricetin O-malonylhexoside	五羟黄酮 O-丙二酰己糖苷	C24H22O15	550.43	6.11	Flavonoids	类黄酮		3453000	717100	880800
Com_1182_pos	Hydroxycinnamate	邻羟基肉桂酸(邻香豆酸)	C9H8O3	164.158	5.54	Cinnamic acids and derivatives	肉桂酸及其衍生物	"614-60-8"	3416000	3454000	3451000
Com_1317_pos	Solanidine	茄啶	C27H43NO	397.636	0.96	Steroids and steroid derivatives	类固醇及其衍生物	"80-78-4"	3400000	2985000	2954000
Com_509_neg	2-Aminoethanesulfonic acid	2-氨基乙磺酸	C2H7NO3S	125.015	1.04	Organic Acid And Its Derivatives	有机酸及其衍生物	"107-35-7"	3365000	1307000	1190000
Com_1551_pos	Sclareolide	香紫苏内酯	C16H26O2	250.38	13.395	Organoheterocyclic compounds	有机杂环化合物	"564-20-5"	3308755	2014000	1851000
Com_410_neg	Isovitexin	异牡荆素	C21H20O10	432.378	6.533	Flavones and Flavonols	黄酮和黄酮醇	"29702-25-8"	3303000	40300000	41720000
Com_233_neg	3-O-p-coumaroyl quinic acid O-hexoside	3-O-对香豆酰奎尼酸-己糖苷	C22H28O13	500.2	7.3	Alcohols and polyols	醇类和多元醇类		3239000	1131000	1163000
Com_714_neg	1-Naphthyl acetate	乙酸-1-萘酯	C12H10O2	186.21	6.99	Benzene and substituted derivatives	苯及其取代衍生物	"830-81-9"	3211000	871300	750300
Com_1625_pos	Methoxsalen	花椒毒素	C12H8O4	216.19	9.259	Coumarins and derivatives	香豆素及其衍生物	"298-81-7"	3171033	2437000	1967000
Com_183_neg	3-Hydroxycinnamic acid	3-羟基肉桂酸	C9H8O3	164.16	6.98	Cinnamic acids and derivatives	肉桂酸及其衍生物	"14755-02-3"	3159000	2355000	2348000
Com_1407_pos	2-Phenylethylamine	2-苯乙胺	C8H11N	121.18	4.584	Amines	胺类	"64-04-0"	3149000	2157000	1867000
Com_909_pos	Asp-glu	L-天冬氨酰-L-谷氨酸	C9H14N2O7	262.217	0.96	Amino Acid And Derivatives	氨基酸及其衍生物	"6157-06-8"	3145000	1626000	1602000
Com_912_pos	D-Homocysteine	D-高半胱氨酸	C4H9NO2S	135.185	1.86	Amino Acid And Derivatives	氨基酸及其衍生物	"454-28-4"	3134000	3202000	3234000
Com_1590_pos	1-Methylguanosine	1,7-甲基鸟苷	C11H15N5O5	297.267	4.04	Nucleotide And Its Derivates	核苷酸及其衍生物	"2140-65-0"	3104000	3923000	3725000
Com_1514_pos	Resokaempferol 7-O-hexoside	瑞香酚 7-邻己糖苷	C21H20O10	434.4	7.08	Flavonoids	类黄酮		3092000	96630000	99310000
Com_209_neg	2-Oxoadipic acid	2-氧代己二酸	C6H8O5	160.037	0.72	Organic Acid And Its Derivatives	有机酸及其衍生物	"3184-35-8"	3087000	1784000	1986000
Com_1285_pos	3-Amino-2-methylpropanoic acid	3-氨基异丁酸	C4H9NO2	103.12	0.931	Amino Acid And Derivatives	氨基酸及其衍生物	"144-90-1"	3076000	5177000	4608000
Com_1385_pos	Tuberonic acid hexoside	己糖醛酸	C18H28O9	388.41	5.89	Carbohydrates And Its Derivatives	糖类及其衍生物		3064000	399900	654700
Com_167_neg	5-O-p-coumaroyl quinic acid O-hexoside	5-O-对香豆酰奎尼酸己糖苷	C22H28O13	500.1	7.3	Alcohols and polyols	醇类和多元醇类		3059000	1147000	1514000
Com_1384_pos	Tyramine	酪胺	C8H11NO	137.179	2	Benzene and substituted derivatives	苯及其取代衍生物	"51-67-2"	3055000	1097000	1091000
Com_497_neg	Sodium Danshensu	丹参素钠	C9H9NaO5	220.15	4.44	Phenylpropanoids and polyketides	苯丙素和聚酮化合物	"67920-52-9"	3046000	563500	605100
Com_538_neg	Oxalacetic acid	草酰乙酸	C4H4O5	132.07	0.69	Organic Acid And Its Derivatives	有机酸及其衍生物	"328-42-7"	3031000	2184000	1908000
Com_505_neg	Gallic acid O-Hexoside	没食子酸 O-己糖苷	C13H16O10	332	4.13	Benzoic acids and derivatives	苯甲酸及其衍生物		3021000	2946000	3192000
Com_154_neg	Maackiain	马卡因	C16H12O5	284.263	9.87	Isoflavonoids	异黄酮	"19908-48-6"	3018816	1672000	1933000
Com_1739_pos	Ferulaldehyde	4-羟基-3-甲氧基肉桂醛	C10H10O3	178.185	7.532	Polyphenol	多酚	"458-36-6"	3001318	1820000	1582000
Com_1461_pos	SDMA	二甲基-L-精氨酸	C8H18N4O2	202.25	0.913	Amino Acid And Derivatives	氨基酸及其衍生物	"30344-00-4"	2946000	9478000	6307000
Com_1453_pos	Prunin	樱黄素	C21H22O10	434.121	7.02	Flavanones	黄烷酮	"529-55-5"	2943000	149300000	135400000
Com_1750_pos	(-)-Norepinephrine N-hexoside	(-)-去甲肾上腺素N-己糖苷	C14H21NO8	331.32	1.05	Glycosides	糖苷类		2920000	10500000	8530000
Com_1013_pos	Trimethyllysine	三甲基赖氨酸	C9H21N2O2	189.275	1.03	Amino Acid And Derivatives	氨基酸及其衍生物	"66989-56-8"	2899000	1117000	1104000
Com_487_neg	Methylenesuccinic acid	衣康酸	C5H6O4	130.099	4.25	Fatty Acyls	脂肪酰类	"97-65-4"	2899000	3006000	2982000
Com_28_neg	D-Arabinono-1,4-lactone	D-阿拉伯-1,4-内酯	C5H8O5	148.037	1.48	Carbohydrates And Its Derivatives	糖类及其衍生物	"2782-09-4"	2883000	2563000	2412000
Com_546_neg	Chlorogenic acid methyl ester	绿原酸甲酯	C17H20O9	368.111	5.7	Alcohols and polyols	醇类和多元醇类	"29708-87-0"	2867737	1927000	1849000
Com_197_neg	Octanedioic acid	辛二酸	C8H14O4	174.19	6.649	Organic Acid And Its Derivatives	有机酸及其衍生物	"505-48-6"	2850000	567600	558600
Com_1081_pos	DL-Citrulline	DL-瓜氨酸	C6H13N3O3	175.19	0.9	Amino Acid And Derivatives	氨基酸及其衍生物	"627-77-0"	2843000	8070000	8151000
Com_53_neg	Chrysoeriol C-pentosyl-O-hexosyl-O-hexoside	金圣草黄素 C-戊糖基-O-二己糖苷	C33H40O20	756.1	5.97	Flavonoids	类黄酮		2786000	663900	664000
Com_569_neg	L-Glutamine	L-谷氨酰胺	C5H10N2O3	146.14	0.868	Amino Acid And Derivatives	氨基酸及其衍生物	"56-85-9"	2749000	2135000	2270000
Com_1072_pos	N alpha-Acetyl-L-Arginine	Nα-乙酰-L-精氨酸	C8H16N4O3	216.238	1.04	Amino Acid And Derivatives	氨基酸及其衍生物	"155-84-0"	2720000	990700	1041000
Com_1584_pos	Chrysoeriol O-malonylhexoside	金圣草黄素 O-丙二酰己糖苷	C25H24O14	548.457	7.51	Flavonoids	类黄酮		2709000	742200	865300
Com_9_neg	L-Gulono-1,4-lactone	古洛糖酸内酯	C6H10O6	178.14	0.948	Sugar Acids And Its Derivatives	糖酸及其衍生物	"1128-23-0"	2708000	2036000	1911000
Com_408_neg	Shogaol	6-姜烯酚	C17H24O3	276.371	12.09	Benzene and substituted derivatives	苯及其取代衍生物	"555-66-8"	2694000	2995000	3129000
Com_913_pos	Deoxyadenosine	2-脱氧腺苷	C10H13N5O3	251.242	2.78	Nucleotide And Its Derivates	核苷酸及其衍生物	"958-09-8"	2685000	18540000	16390000
Com_596_neg	Isorhoifolin	异野漆树苷	C27H30O14	578.52	6.84	Flavonoids	类黄酮	"552-57-8"	2663000	174900000	158600000
Com_1781_pos	Tangeretin	桔皮素	C20H20O7	372.37	11.41	Flavones and Flavonols	黄酮和黄酮醇	"481-53-8"	2658000	435900000	437500000
Com_1329_pos	LysoPC 20:4	溶血磷脂酰胆碱 20:4	C28H50NO7P	543.4	12.69	Phospholipid	磷脂		2657564	2093000	1721000
Com_833_pos	Histidine	组氨酸	C6H9N3O2	155.15	0.81	Amino Acid And Derivatives	氨基酸及其衍生物	"4998-57-6"	2655000	4622000	4893000
Com_1297_pos	N-Methyl-Trans-4-Hydroxy-L-Proline	N-甲基-反式-4-羟基-L-脯氨酸	C6H11NO3	145.074	0.91	Amino Acid And Derivatives	氨基酸及其衍生物	"4252-82-8"	2623000	2729000	2733000
Com_627_neg	Diosmetin	香叶木素	C16H12O6	300.26	8.911	Flavones and Flavonols	黄酮和黄酮醇	"520-34-3"	2618000	26190000	26900000
Com_1653_pos	6-hydroxy-7,8-dimethoxycoumarin	6-羟基-7,8- 二甲氧基香豆素	C11H10O5	222.197	10.21	Coumarins and derivatives	香豆素及其衍生物		2611000	3430000	4329000
Com_1180_pos	2-Methyladenosine	2-甲基腺苷	C11H15N5O4	281.268	1.05	Nucleotide And Its Derivates	核苷酸及其衍生物	"16526-56-0"	2608000	4379000	4471000
Com_738_neg	L-Citramalic acid	2-甲基苹果酸	C5H8O5	148.037	1.46	Organic Acid And Its Derivatives	有机酸及其衍生物	"6236-09-5"	2596000	2392000	2628000
Com_1786_pos	5-Aminosalicylic Acid	5-氨基水杨酸	C7H7NO3	153.135	1.68	Organic Acid And Its Derivatives	有机酸及其衍生物	"89-57-6"	2596000	3357000	3563000
Com_467_neg	D-Glucose 6-phosphate	D-葡萄糖-6-磷酸	C6H13O9P	260.03	0.86	Carbohydrates And Its Derivatives	糖类及其衍生物	"56-73-5"	2570000	28030000	24520000
Com_854_pos	C-pentosyl-C-hexosyl-apigenin	C-戊糖基C-己糖芹菜素	C26H28O14	564.49	6.05	Flavonoids	类黄酮		2536000	581200	528000
Com_1675_pos	Methyl Benzoate	苯甲酸甲酯	C8H8O2	136.148	1.84	Benzoic acids and derivatives	苯甲酸及其衍生物	"93-58-3"	2530000	1710000	1675000
Com_355_neg	DL-o-Tyrosine	DL-O-酪氨酸	C9H11NO3	181.189	1.81	Amino Acid And Derivatives	氨基酸及其衍生物	"2370-61-8"	2519000	4601000	5119000
Com_1209_pos	L-Leucyl-L-alanine	L-亮氨酸-L-丙氨酸	C9H18N2O3	202.25	3	Amino Acid And Derivatives	氨基酸及其衍生物	"7298-84-2"	2495000	1815000	1598000
Com_193_neg	Androsin	草夹竹桃苷	C15H20O8	328.319	4.3	Phenols And Its Derivatives	酚类及其衍生物	"531-28-2"	2476000	1106000	1203000
Com_276_neg	3-O-Feruloylquinic acid	3-O-阿魏酰奎宁酸	C17H20O9	368.335	5.55	Alcohols and polyols	醇类和多元醇类	"1899-29-2"	2436802	2037000	2053000
Com_262_neg	Saponarin	皂草苷	C27H30O15	594.518	6.27	Flavonoids	类黄酮	"20310-89-8"	2400026	962400	975500
Com_138_neg	beta-D-glucopyranosyl-caffeic acid	β-D-吡喃葡萄糖基咖啡酸	C15H20O9	344.31	5.29	Polyphenol	多酚		2386000	2995000	3290000
Com_429_neg	D-Ribose	D-核糖	C5H10O5	150.13	0.92	Carbohydrates And Its Derivatives	糖类及其衍生物	"50-69-1"	2377000	1641000	1735000
Com_785_pos	Dibutyl phthalate	邻苯二甲酸二丁酯	C16H22O4	278.152	13.42	Benzoic acids and derivatives	苯甲酸及其衍生物	"84-74-2"	2371000	4093000	3865000
Com_797_pos	Nε,Nε,Nε-trimethyllysine	Nε,Nε,Nε-三甲基赖氨酸	C9H20N2O2	188.267	0.76	Amino Acid And Derivatives	氨基酸及其衍生物	"19253-88-4"	2370000	5232000	5127000
Com_1036_pos	Eriodictyol O-malonylhexoside	圣草酚 O-丙二酰己糖苷	C24H24O14	536	7.12	Flavonoids	类黄酮		2367000	495800	524400
Com_590_neg	Rhoifolin	芹菜素 7-O-新橘皮糖苷 (野漆树苷)	C27H30O14	578.52	6.94	Flavonoids	类黄酮	"17306-46-6"	2359000	210700000	206600000
Com_256_neg	D-Fructose 6-Phosphate	D-果糖-6-磷酸	C6H13O9P	260.136	0.86	Carbohydrates And Its Derivatives	糖类及其衍生物	"643-13-0"	2353000	26620000	26180000
Com_1201_pos	LysoPC 18:1	溶血磷脂酰胆碱 18:1	C26H52NO7P	521.1	12.86	Phospholipid	磷脂		2331298	900900	743700
Com_843_pos	Benzoyleneurea	2,4-喹唑啉二酮	C8H6N2O2	162.15	11.68	Organoheterocyclic compounds	有机杂环化合物	"86-96-4"	2315000	3892000	3224000
Com_611_neg	Scutellarin	野黄芩苷	C21H18O12	462.36	6.59	Flavonoids	类黄酮	"27740-01-8"	2311000	396800	477700
Com_426_neg	D-Galactose	D-半乳糖	C6H12O6	180.16	0.9	Carbohydrates And Its Derivatives	糖类及其衍生物	"59-23-4"	2298000	9722000	9458000
Com_87_neg	Forsythoside I	连翘脂苷I	C29H36O15	624.595	6.48	Phenylpropanoids	苯丙素类	"1177581-50-8"	2287000	633100	603100
Com_170_neg	Tricin O-saccharic acid	苜蓿素 O-葡萄糖二酸	C23H22O14	522.1	6.58	Flavonoids	类黄酮		2282000	1468000	1641000
Com_751_neg	Eupatilin	异泽兰黄素	C18H16O7	344.32	10.004	Flavones and Flavonols	黄酮和黄酮醇	"22368-21-4"	2275000	21140000	21590000
Com_829_pos	Allopurinol	别嘌呤	C5H4N4O	136.111	2.69	Nucleotide And Its Derivates	核苷酸及其衍生物	"315-30-0"	2255000	4068000	3916000
Com_969_pos	Apigenin C-glucoside	芹菜素 C-葡萄糖苷	C21H20O10	432.113	6.46	Flavonoids	类黄酮	"38953-85-4"	2251000	26570000	25610000
Com_1608_pos	NG,NG-Dimethyl-L-arginine	N,N-二甲基精氨酸	C8H20Cl2N4O2	202.254	0.93	Amino Acid And Derivatives	氨基酸及其衍生物	"220805-22-1"	2238000	8299000	4193000
Com_1273_pos	Yangonin	甲氧醉椒素	C15H14O4	258.269	10.56	Phenylpropanoids and polyketides	苯丙素和聚酮化合物	"500-62-9"	2208781	1225000	1135000
Com_151_neg	Forsythoside A	连翘脂苷A	C29H36O15	624.587	6.46	Phenylpropanoids	苯丙素类	"79916-77-1"	2201000	480500	479500
Com_604_neg	Esculetin	6,7-二羟基香豆素	C9H6O4	178.14	5.832	Coumarins and derivatives	香豆素及其衍生物	"305-01-1"	2196000	581300	572400
Com_1711_pos	Oxymatrine	氧化槐定碱	C15H24N2O2	264.368	6.76	Alkaloids and derivatives	生物碱及其衍生物	"54809-74-4"	2180000	23300000	21730000
Com_103_neg	2-Caffeoyl-L-tartaric acid	咖啡酰酒石酸	C13H12O9	312.048	6.46	Phenolic acids	酚酸类	"67879-58-7"	2174000	510700	654500
Com_605_neg	Gallic acid	没食子酸	C7H6O5	170.12	2.84	Benzoic acids and derivatives	苯甲酸及其衍生物	"149-91-7"	2162000	2186000	2274000
Com_222_neg	D-Glucuronic acid	葡萄糖醛酸	C6H10O7	194.14	0.894	Carbohydrates And Its Derivatives	糖类及其衍生物	"6556-12-3"	2161237	2647000	2483000
Com_932_pos	N-Acetyl-L-valine	N-乙酰-L-缬氨酸	C7H13NO3	159.183	0.96	Amino Acid And Derivatives	氨基酸及其衍生物	"96-81-1"	2161000	4743000	4192000
Com_1113_pos	4,6-Dihydroxyquinoline O-hexoside	4,6-二羟基喹啉O-己糖苷	C15H17NO7	323.303	1.09	Quinolines and derivatives	喹啉及其衍生物		2153000	1715000	1836000
Com_1367_pos	alpha-Keto-gamma-(methylthio)butyric acid	α-酮-γ-甲硫基丁酸	C5H8O3S	148.18	13.57	Organic Acid And Its Derivatives	有机酸及其衍生物	"583-92-6"	2146000	3562000	2031000
Com_1470_pos	Umbelliferone	7-羟基香豆素	C9H6O3	162.14	6.855	Coumarins and derivatives	香豆素及其衍生物	"93-35-6"	2127000	7041000	6371000
Com_1456_pos	trans-Zeatin riboside	玉米素核苷	C15H21N5O5	351.358	5.212	Phytohormones	植物激素	"6025-53-2"	2118111	1146000	1027000
Com_414_neg	Kaempferol 3-A-L-Arabinopyranoside	山柰酚-3-O-α-L-吡喃阿拉伯糖苷	C20H18O10	418.351	7.08	Flavonoids	类黄酮	"99882-10-7"	2118000	397600	404100
Com_876_pos	Xanthosine	黄嘌呤核苷	C10H12N4O6	284.225	3.928	Nucleotide And Its Derivates	核苷酸及其衍生物	"146-80-5"	2090000	1730000	1734000
Com_521_neg	Isoorientin	异荭草素	C21H20O11	448.38	6.174	Flavones and Flavonols	黄酮和黄酮醇	"4261-42-1"	2089000	30930000	31250000
Com_20_neg	alpha-Benzylsuccinic acid	α-苄基丁二酸	C11H12O4	208.211	0.71	Organic Acid And Its Derivatives	有机酸及其衍生物	"884-33-3"	2081000	1143000	1311000
Com_1124_pos	4-Methyl-5-thiazoleethanol	4-甲基-5-噻唑乙醇	C6H9NOS	143.1	3.95	Organoheterocyclic compounds	有机杂环化合物	"137-00-8"	2071000	8625000	7086000
Com_1195_pos	Phellodenol H O-hexoside	黄柏酚H O-己糖苷	C23H30O14	530.483	5.96	Coumarins and derivatives	香豆素及其衍生物		2048853	1286000	1493000
Com_283_neg	Ligustrazine	川芎嗪	C8H12N2	136.197	0.88	Alkaloids and derivatives	生物碱及其衍生物	"1124-11-4"	2018000	952500	1100000
Com_938_pos	6-Aminohexanoic acid	氨基己酸	C6H13NO2	131.173	2.1	Amino Acid And Derivatives	氨基酸及其衍生物	"1319-82-0"	2017000	1217000	1151000
Com_526_neg	Inositol	肌醇	C6H12O6	180.16	0.85	Alcohols and polyols	醇类和多元醇类	"87-89-8"	2015000	9505000	8580000
Com_1283_pos	Nepsilon-Acetyl-L-lysine	N6-乙酰-L-赖氨酸	C8H16N2O3	188.22	1.304	Amino Acid And Derivatives	氨基酸及其衍生物	"692-04-6"	2007000	2993000	2689000
Com_275_neg	2-Amino-3-hydroxypropionic acid	DL-丝氨酸	C3H7NO3	105.09	0.83	Amino Acid And Derivatives	氨基酸及其衍生物	"302-84-1"	1999000	1243000	1333000
Com_111_neg	Xanthotoxol	花椒毒酚	C11H6O4	202.163	7.742	Coumarins and derivatives	香豆素及其衍生物	"2009-24-7"	1989805	2353000	2329000
Com_1203_pos	LysoPE 18:2 (2n isomer)	溶血磷脂酰乙醇胺 18:2(2n异构)	C23H44NO7P	477.6	12.08	Phospholipid	磷脂		1972222	2041000	1667000
Com_1374_pos	Orotic acid	乳清酸	C5H4N2O4	156.096	1.44	Vitamins	维生素	"65-86-1"	1964000	1997000	1203000
Com_1094_pos	Isomangiferin	异芒果苷	C19H18O11	422.085	1.51	Xanthone	口山酮	"24699-16-9"	1960000	835800	908100
Com_1606_pos	Nicotinate ribonucleoside	烟酸核苷	C11H13NO6	255.224	1.04	Carbohydrates And Its Derivatives	糖类及其衍生物	"17720-18-2"	1954000	1766000	2325000
Com_1196_pos	Punicic acid	石榴酸	C18H30O2	278.3	12.65	Fatty Acyls	脂肪酰类	"544-72-9"	1947000	32550000	27560000
Com_105_neg	D-2-Hydroxyisocaproate	2-羟基异己酸	C6H12O3	132.079	7.12	Fatty Acyls	脂肪酰类	"20312-37-2"	1910000	522600	635400
Com_1011_pos	gamma-Glutamylglutamic acid	γ-谷氨酰谷氨酸	C10H16N2O7	276.243	1.05	Amino Acid And Derivatives	氨基酸及其衍生物	"1116-22-9"	1898000	1478000	1355000
Com_897_pos	N-Acetylthreonine	N-乙酰基苏氨酸	C6H11NO4	161.069	1.73	Amino Acid And Derivatives	氨基酸及其衍生物	"17093-74-2"	1897000	1943000	1368000
Com_22_neg	4-O-p-Coumaroylquinic acid	4-O-对香豆酰奎宁酸	C16H18O8	338.1	5.93	Phenolic acids	酚酸类	"32451-86-8"	1891000	1956000	2252000
Com_891_pos	Indole-3-carboxylic acid	3-吲哚甲酸	C9H7NO2	161.16	7.142	Indoles and derivatives	吲哚及其衍生物	"771-50-6"	1877000	499500	513100
Com_1743_pos	di-C,C-hexosyl-apigenin derivative	芹菜素C,C-二己糖苷衍生物	C27H30O15	594.518	6.36	Flavonoids	类黄酮		1874666	1693000	1670000
Com_433_neg	Afzelechin	阿福豆素	C15H14O5	274.084	0.68	Flavonoids	类黄酮	"2545-00-8"	1873000	1374000	1486000
Com_92_neg	Neohesperidin	新橙皮苷	C28H34O15	610.56	7.2	Flavanones	黄烷酮	"13241-33-3"	1867000	182900000	185800000
Com_904_pos	7-demethylsuberosin	7-去甲基软木花椒素	C14H14O3	230.263	9.89	Phenylpropanoids	苯丙素类	"21422-04-8"	1863442	902300	708100
Com_1701_pos	1-Linoleoyl-Rac-Glycerol	亚油酸甘油酯(C18:2)	C21H38O4	354.524	12.05	Fatty Acyls	脂肪酰类	"2277-28-3"	1860435	671100	659100
Com_600_neg	12,13-EODE	12,13-环氧十八碳二烯酸	C18H32O3	296	12.67	Fatty Acyls	脂肪酰类		1856000	24360000	25050000
Com_1760_pos	3,4-Dihydroxybenzaldehyde	原儿茶醛	C7H6O3	138.12	5.306	Phenols And Its Derivatives	酚类及其衍生物	"139-85-5"	1828000	829600	638700
Com_556_neg	gamma,gamma-Dimethylallyl pyrophosphate	二甲基烯丙基焦磷酸酯	C5H12O7P2	246.092	0.95	Prenol lipids	烯醇酯	"358-72-5"	1822000	16670000	16960000
Com_560_neg	Neoeriocitrin	新北美圣草苷	C27H32O15	596.542	6.38	Flavanones	黄烷酮	"13241-32-2"	1819000	63800000	65870000
Com_1752_pos	(1S,2S)-Nicotine1-oxide	(1S,2S)-尼古丁-1-氧化物	C10H14N2O	178.231	7.41	Pyridines and derivatives	吡啶及其衍生物	"51095-86-4"	1818000	675400	649300
Com_438_neg	Fmoc-Ile-OH	Fmoc-L-异亮氨酸	C21H23NO4	353.418	7.71	Amino Acid And Derivatives	氨基酸及其衍生物	"71989-23-6"	1810000	574300	570400
Com_665_neg	Lactic acid	乳酸	C3H6O3	90.078	1.48	Organic Acid And Its Derivatives	有机酸及其衍生物	"50-21-5"	1783000	1700000	1620000
Com_638_neg	9S-Hydroxy-10E,12Z-octadecadienoic acid	9S-羟基-10E,12Z-十八碳二烯酸	C18H32O3	296.235	12.61	Fatty Acyls	脂肪酰类	"15514-85-9"	1780000	24390000	23810000
Com_1244_pos	iP9G	9-β-葡糖基-N6-(异戊二烯基)腺嘌呤	C16H23N5O5	365.384	1	Phytohormones	植物激素	"83087-94-9"	1775000	3275000	2909000
Com_200_neg	Terephthalic acid	对苯二甲酸	C8H6O4	166.13	5.801	Benzoic acids and derivatives	苯甲酸及其衍生物	"100-21-0"	1770000	1924000	1924000
Com_767_pos	Thymine	胸腺嘧啶	C5H6N2O2	126.113	2.5	Nucleotide And Its Derivates	核苷酸及其衍生物	"65-71-4"	1766000	732100	557300
Com_764_pos	Swainsonine	苦马豆素	C8H15NO3	173.21	5.53	Alkaloids and derivatives	生物碱及其衍生物	"72741-87-8"	1755000	591000	567900
Com_684_neg	Galactinol	肌醇半乳糖苷	C12H22O11	342.116	0.99	Carbohydrates And Its Derivatives	糖类及其衍生物		1754000	182300000	172300000
Com_119_neg	Apigenin	芹菜素	C15H10O5	270.24	8.7	Flavones and Flavonols	黄酮和黄酮醇	"520-36-5"	1731000	19130000	20340000
Com_1218_pos	D-Threonine	D-苏氨酸	C4H9NO3	119.119	0.86	Amino Acid And Derivatives	氨基酸及其衍生物	"632-20-2"	1729000	2012000	1960000
Com_765_pos	Threonyl carbamoyl adenosine	氨甲酰腺苷	C15H20N6O8	412.35	5.08	Nucleotide And Its Derivates	核苷酸及其衍生物		1724000	4543000	3652000
Com_1044_pos	3',4',5'-Dihydrotricetin O-hexosyl-O-hexoside	3',4',5'-二氢三羟黄酮 O-二己糖苷	C30H38O17	670.1	6.01	Flavonoids	类黄酮		1723088	1339000	1302000
Com_739_neg	12(13)-EpOME	12,13-环氧-9-十八碳烯酸	C18H32O3	296.235	12.61	Fatty Acyls	脂肪酰类	"6799-85-5"	1720000	23660000	23190000
Com_645_neg	Aurantio-obtusin	橙黄决明素	C17H14O7	330.289	9.734	Quinones	醌类	"67979-25-3"	1710000	325700	369500
Com_566_neg	Danshensu	丹参素	C9H10O5	198.17	4.473	Phenolic acids	酚酸类	"76822-21-4"	1674000	313700	315800
Com_494_neg	sesamolin	芝麻林素	C20H18O7	370.105	5.64	Organoheterocyclic compounds	有机杂环化合物	"526-07-8"	1644025	1280000	1365000
Com_685_neg	Kaempferol 7-O-rhamnoside	山奈酚 7-O-鼠李糖苷	C21H20O10	432.106	7.36	Flavones and Flavonols	黄酮和黄酮醇	"20196-89-8"	1633000	172900	177000
Com_1208_pos	D-Serine	D-丝氨酸	C3H7NO3	105.09	0.851	Amino Acid And Derivatives	氨基酸及其衍生物	"312-84-5"	1632000	2171000	2324000
Com_1493_pos	Phe-Pro	L-苯丙氨酰-L-脯氨酸	C14H18N2O3	262.304	5.58	Amino Acid And Derivatives	氨基酸及其衍生物	"7669-65-0"	1621000	1689000	1688000
Com_1185_pos	Luteolin C-hexoside derivative	木犀草素 C-己糖苷衍生物	C21H20O11	448.4	6.1	Flavonoids	类黄酮		1618000	27720000	26550000
Com_316_neg	Tiglic acid	惕各酸	C5H8O2	100.12	18.476	Fatty Acyls	脂肪酰类	"80-59-1"	1615000	1648000	1980000
Com_1545_pos	D-Sorbitol	D-山梨糖醇	C6H14O6	182.172	0.89	Sugar Alcohols	糖醇	"50-70-4"	1600000	841100	898200
Com_1114_pos	sn-Glycero-3-phosphocholine	SN-甘油-3-磷酸胆碱	C8H20NO6P	257.22	0.91	Glycerophospholipids	甘油磷脂	"28319-77-9"	1597000	21180000	20000000
Com_1167_pos	4-Hydroxymandelonitrile	对羟基扁桃腈	C8H7NO2	149.048	1.44	Phenols And Its Derivatives	酚类及其衍生物	"13093-65-7"	1592252	2925000	3822000
Com_1556_pos	Linarin	蒙花苷	C28H32O14	592.553	7.79	Flavonoids	类黄酮	"480-36-4"	1590000	846500	787700
Com_625_neg	Naringin Dihydrochalcone	柚皮苷二氢查尔酮	C27H34O14	582.55	7.372	Flavonoids	类黄酮	"18916-17-1"	1584671	816900	846700
Com_40_neg	Polyphyllin V	重楼皂苷V	C39H62O12	722.914	11.85	Saponin	皂苷	"19057-67-1"	1577541	802300	961000
Com_952_pos	8-Chlro-1-tetrahydronorharmanone	8-氯-1-四氢酮	C11H9ClN2O	220.655	2.67	Indoles and derivatives	吲哚及其衍生物	"5565-76-4"	1571000	1935000	1688000
Com_326_neg	alpha-D-Glucose	葡萄糖	C6H12O6	180.16	0.912	Carbohydrates And Its Derivatives	糖类及其衍生物	"492-62-6"	1568000	5574000	7415000
Com_94_neg	Shikimic Acid	莽草酸	C7H10O5	174.15	1.038	Alcohols and polyols	醇类和多元醇类	"138-59-0"	1568000	1363000	1423000
Com_953_pos	Indole-3-acetic acid	1H-吲哚-3-乙酸	C10H9NO2	175.18	7.567	Phytohormones	植物激素	"87-51-4"	1567000	854500	789300
Com_427_neg	Coniferin	松柏苷	C16H22O8	342.132	0.97	Carbohydrates And Its Derivatives	糖类及其衍生物	"531-29-3"	1546000	167300000	127500000
Com_1382_pos	tZROG	反式玉米素核苷-O-葡萄糖苷	C21H31N5O10	513.498	5.2	Phytohormones	植物激素	"62512-97-4"	1532000	340000	266700
Com_979_pos	delta-Tridecalactone	十三烷内脂	C13H24O2	212.3	9.2	Fatty Acyls	脂肪酰类	"7370-92-5"	1531000	774100	727900
Com_412_neg	2'-Deoxyguanosine	脱氧鸟苷	C10H13N5O4	267.241	3.181	Nucleotide And Its Derivates	核苷酸及其衍生物	"961-07-9"	1525000	2094000	2188000
Com_301_neg	5-hydroxyhexanoic acid	5-羟基己酸	C6H12O3	132.079	7.21	Organic Acid And Its Derivatives	有机酸及其衍生物	"185956-02-9"	1523000	393300	420800
Com_601_neg	13-HPODE	13-过氧十八碳二烯酸	C18H32O4	312.1	11.45	Fatty Acyls	脂肪酰类	"33964-75-9"	1523000	1018000	1042000
Com_793_pos	Purine	嘌呤	C5H4N4	120.112	4.1	Purines and purine derivatives	嘌呤及其衍生物	"120-73-0"	1518000	1406000	1297000
Com_803_pos	Nodakenin	紫花前胡苷	C20H24O9	408.399	6.909	Phenylpropanoids	苯丙素类	"495-31-8"	1513977	1742000	1608000
Com_1098_pos	Cinnamic Acid	桂皮酸	C9H8O2	148.16	0.87	Cinnamic acids and derivatives	肉桂酸及其衍生物	"621-82-9"	1507000	860400	808200
Com_500_neg	1-O-beta-D-Glucopyranosyl sinapate	芥子酸吡喃葡萄糖苷	C17H22O10	386.1	5.88	Phenols And Its Derivatives	酚类及其衍生物		1493738	1662000	1609000
Com_347_neg	D-Glucopyranose	β-D-葡萄糖	C6H12O6	180.156	0.87	Carbohydrates And Its Derivatives	糖类及其衍生物	"28905-12-6"	1491000	4822000	5303000
Com_1023_pos	5-Methyltryptamine	5-甲基色胺	C11H14N2	174.242	8.51	Amino Acid And Derivatives	氨基酸及其衍生物	"1821-47-2"	1474000	1158000	998600
Com_1352_pos	Icariside B2	淫羊藿次苷 B2	C19H30O8	386.194	6.05	Organooxygen compounds	有机氧化合物	"108906-51-0"	1471000	1295000	1221000
Com_388_neg	D-Glucose	D-无水葡萄糖	C6H12O6	180.156	0.94	Carbohydrates And Its Derivatives	糖类及其衍生物	"50-99-7"	1455000	5032000	5442000
Com_1638_pos	Neocnidilide	新蛇床内酯	C12H18O2	194.274	11.74	Organoheterocyclic compounds	有机杂环化合物	"4567-33-3"	1448000	198700000	167300000
Com_910_pos	L-Hydroxylysine	5-羟基-L-赖氨酸	C6H14N2O3	163.195	0.9	Amino Acid And Derivatives	氨基酸及其衍生物	"1190-94-9"	1447000	4287000	3822000
Com_4_neg	Eriodictyol	圣草酚	C15H12O6	288.252	7.999	Flavanones	黄烷酮	"552-58-9"	1447000	761700	746900
Com_29_neg	Eicosenoic acid	二十碳烯酸	C20H38O2	310.287	9.87	Fatty Acyls	脂肪酰类	"26764-41-0"	1444000	416900	409400
Com_1343_pos	picrocrocin	苦番红花素	C16H26O7	330.37	6.36	Carbohydrates And Its Derivatives	糖类及其衍生物	"138-55-6"	1437000	344000	434800
Com_1591_pos	dAMP	2'-脱氧腺苷-5'-单磷酸	C10H14N5O6P	331.222	1.47	Nucleotide And Its Derivates	核苷酸及其衍生物	"653-63-4"	1436102	1120000	1086000
Com_1052_pos	Methyl chlorogenate	3-咖啡酰奎尼酸甲酯	C17H20O9	368.34	6.24	Alcohols and polyols	醇类和多元醇类	"123483-19-2"	1430000	6244000	4057000
Com_1472_pos	Scoparone	滨蒿内酯	C11H10O4	206.19	7.935	Coumarins and derivatives	香豆素及其衍生物	"120-08-1"	1424067	696400	596400
Com_620_neg	Isomaltulose	异麦芽酮糖	C12H22O11	342.116	0.97	Carbohydrates And Its Derivatives	糖类及其衍生物	"13718-94-0"	1423000	176900000	122000000
Com_48_neg	p-Coumaric acid 4-O-hexoside	对香豆酸 4-邻己糖	C15H18O8	326.303	5.54	Cinnamic acids and derivatives	肉桂酸及其衍生物		1408000	2165000	2570000
Com_148_neg	Neohesperidin dihydrochalcone	新橙皮苷二氢查耳酮	C28H36O15	612.576	6.43	Flavanones	黄烷酮	"20702-77-6"	1406000	2232000	1893000
Com_1718_pos	Tanshindiol B	丹参二醇B	C18H16O5	312.317	9.074	Alcohols and polyols	醇类和多元醇类	"97465-70-8"	1401967	2192000	1854000
Com_1788_pos	5-Methoxyindoleacetic acid	5-甲氧基吲哚-3-乙酸	C11H11NO3	205.21	4.87	Indoles and derivatives	吲哚及其衍生物	"3471-31-6"	1396000	4374000	4194000
Com_484_neg	Pseudouridine	假尿苷	C9H12N2O6	244.07	1.87	Nucleotide And Its Derivates	核苷酸及其衍生物	"1445-07-4"	1395000	1904000	1928000
Com_202_neg	Luteolin	木犀草素	C15H10O6	286.24	8.06	Flavones and Flavonols	黄酮和黄酮醇	"491-70-3"	1388000	973900	949500
Com_1604_pos	p-Coumaroylagmatine	对苯丙胺	C14H20N4O2	276.334	12.15	Cinnamic acids and derivatives	肉桂酸及其衍生物	"7295-86-5"	1379000	970900	777300
Com_744_neg	3,4-Dihydroxyphenylacetic acid	3,4-二羟基苯乙酸	C8H8O4	168.15	4.949	Benzoic acids and derivatives	苯甲酸及其衍生物	"102-32-9"	1374609	739000	858500
Com_1542_pos	6-Hydroxynicotinic acid	6-羟基烟酸	C6H5NO3	139.11	2.908	Pyridines and derivatives	吡啶及其衍生物	"5006-66-6"	1370000	528200	511000
Com_448_neg	13(S)-HODE;13(S)-Hydroxyoctadeca-9Z,11E-dienoic acid	13-羟基十八烷基-9,11-二烯酸	C18H32O3	296.235	12.61	Fatty Acyls	脂肪酰类	"10219-69-9"	1369000	20440000	20390000
Com_888_pos	Tryptophol	色醇	C10H11NO	161.2	7.656	Indoles and derivatives	吲哚及其衍生物	"526-55-6"	1364288	1239000	1098000
Com_655_neg	Catechol	邻苯二酚	C6H6O2	110.11	5.29	Benzene and substituted derivatives	苯及其取代衍生物	"120-80-9"	1360261	547300	557800
Com_1429_pos	Xanthurenic acid	黄尿酸(4,8-二羟基喹啉甲酸)	C10H7NO4	205.167	5.06	Quinolines and derivatives	喹啉及其衍生物	"59-00-7"	1347000	4644000	4253000
Com_310_neg	Kaempferin	阿福豆苷(番泻叶山奈苷)	C21H20O10	432.106	7.35	Flavonoids	类黄酮	"482-39-3"	1340000	153400	183300
Com_631_neg	Guanosine	鸟苷	C10H13N5O5	283.24	2.772	Nucleotide And Its Derivates	核苷酸及其衍生物	"118-00-3"	1339000	1675000	1730000
Com_1042_pos	6-Hydroxymethylherniarin	6-羟甲基脱肠草素	C11H10O4	206.1	5.96	Coumarins and derivatives	香豆素及其衍生物	"117597-79-2"	1337000	798600	889500
Com_1108_pos	Myricetin 3-O-galactoside	杨梅酮 3-O-半乳糖苷	C21H20O13	480.376	7.19	Flavones and Flavonols	黄酮和黄酮醇	"15648-86-9"	1319000	891900	849300
Com_1176_pos	Malvidin O-hexoside	锦葵色素 O-己糖苷	C23H24O12	492.436	7.18	Anthocyanins	花青素		1312336	860200	777700
Com_997_pos	L-Glycyl-L-phenylalanine	L-甘氨酰-L-苯丙氨酸	C11H14N2O3	222.1	4.97	Amino Acid And Derivatives	氨基酸及其衍生物	"721-66-4"	1312000	2201000	2066000
Com_1255_pos	iP7G	异戊烯基-7-葡糖苷	C16H23N5O5	365.2	1	Phytohormones	植物激素		1308000	3708000	4866000
Com_1159_pos	L-Ornithine	鸟氨酸	C5H12N2O2	132.16	0.762	Amino Acid And Derivatives	氨基酸及其衍生物	"70-26-8"	1301000	3825000	3586000
Com_1009_pos	1-Methylhistidine	1-甲基组氨酸	C7H11N3O2	169.18	0.84	Amino Acid And Derivatives	氨基酸及其衍生物	"332-80-9"	1299000	1414000	1440000
Com_565_neg	L-Threonine	L-苏氨酸	C4H9NO3	119.119	0.888	Amino Acid And Derivatives	氨基酸及其衍生物	"72-19-5"	1292000	645200	673800
Com_1296_pos	Demissidine	垂茄次碱	C27H45NO	399.35	11.06	Alkaloids and derivatives	生物碱及其衍生物	"474-08-8"	1290000	1716000	1196000
Com_450_neg	Undecanoic acid	十一烷酸	C11H22O2	186.162	6.17	Fatty Acyls	脂肪酰类	"112-37-8"	1286630	534600	615800
Com_75_neg	Lawsone	2-羟基-1,4-萘醌	C10H6O3	174.15	7.96	Benzene and substituted derivatives	苯及其取代衍生物	"83-72-7"	1285077	410200	363800
Com_1268_pos	Alanine	丙氨酸	C3H7NO2	89.094	0.86	Amino Acid And Derivatives	氨基酸及其衍生物	"338-69-2"	1276000	4303000	4112000
Com_630_neg	Salidroside	红景天苷	C14H20O7	300.304	5.089	Glycosides	糖苷类	"10338-51-9"	1261000	281000	350000
Com_241_neg	3-Ureidopropionate	3-脲基丙酸	C4H8N2O3	132.053	0.82	Organic Acid And Its Derivatives	有机酸及其衍生物	"462-88-4"	1260000	4905000	6072000
Com_1523_pos	N-Acetyl-L-histidine	N-乙酰-L-组氨酸	C8H11N3O3	197.191	1	Amino Acid And Derivatives	氨基酸及其衍生物	"2497-02-1"	1260000	1238000	973500
Com_756_pos	L-Alanyl-L-leucine	L-丙氨酰-L-亮氨酸	C9H18N2O3	202.251	4.45	Amino Acid And Derivatives	氨基酸及其衍生物	"3303-34-2"	1257000	1295000	1224000
Com_784_pos	C-hexosyl-tricetin O-pentoside	C-己糖基-三乙素O-戊糖苷	C26H28O17	612.49	7.02	Flavonoids	类黄酮		1254000	10620000	11050000
Com_606_neg	Gluconolactone	葡糖酸内酯	C6H10O6	178.14	1.02	Carbohydrates And Its Derivatives	糖类及其衍生物	"90-80-2"	1224000	613900	626300
Com_1103_pos	DIMBOA glucoside	2,4-二羟基-7-甲氧基-1,4-苯并恶嗪-3-酮葡糖苷	C15H19NO10	374.108	4.26	Carbohydrates And Its Derivatives	糖类及其衍生物	"18607-79-9"	1223000	375300	347400
Com_717_neg	7-O-Methyleriodictyol	7-O-甲基圣草酚	C16H14O6	302.079	8.86	Flavonoids	类黄酮	"51857-11-5"	1211000	190500	185200
Com_1409_pos	Oxidized glutathione	氧化谷胱甘肽	C20H32N6O12S2	630.646	1.06	Amino Acid And Derivatives	氨基酸及其衍生物	"121-24-4"	1205000	4436000	3137000
Com_1040_pos	3-Hydroxykynurenine	3-羟基犬尿素	C10H12N2O4	224.1	5.96	Carbonyl compounds	醛酮类	"2147-61-7"	1204000	348400	219500
Com_709_neg	1,5-Anhydro-D-glucitol	1,5-酐-D-山梨糖醇	C6H12O5	164.069	1	Alcohols and polyols	醇类和多元醇类	"154-58-5"	1179000	1548000	1502000
Com_447_neg	Capsianoside I	辣椒萜苷 I	C32H52O14	660.336	0.98	Terpenoids	萜类	"121924-04-7"	1169000	2972000	3040000
Com_321_neg	D-3-Phosphoglyceric acid	D-3-磷酸甘油酸	C3H5H2O7P	230.021	0.95	Sugar Acids And Its Derivatives	糖酸及其衍生物	"80731-10-8"	1163000	1529000	1704000
Com_1705_pos	Wilforlide A	雷公藤内酯甲	C30H46O3	454.694	10.01	Terpenoids	萜类	"84104-71-2"	1160265	547000	519500
Com_1561_pos	Prim-O-glucosylcimifugin	升麻素苷	C22H28O11	468.457	6.25	Carbohydrates And Its Derivatives	糖类及其衍生物	"80681-45-4"	1148835	423500	566700
Com_1145_pos	N-Hydroxy-L-tryptophan	N-羟基-L-色氨酸	C11H12N2O3	220.225	2.66	Amino Acid And Derivatives	氨基酸及其衍生物	"87843-31-0"	1143000	1381000	1258000
Com_89_neg	Purpureaside C	洋地黄叶苷C	C35H46O20	786.737	5.91	Phenylpropanoids	苯丙素类	"108648-07-3"	1131927	388600	454900
Com_1097_pos	10-Formyl-THF	甲酰四氢叶酸	C20H23N7O7	473.439	4.83	Organoheterocyclic compounds	有机杂环化合物	"2800-34-2"	1130000	5395000	5442000
Com_12_neg	1,6-Anhydro-beta-D-Glucopyranose	1,6-脱水-吡喃葡萄糖	C6H10O5	162.141	2.3	Carbohydrates And Its Derivatives	糖类及其衍生物	"498-07-7"	1126000	5441000	5680000
Com_33_neg	Apigenin7-O-beta-D-glucuronide	芹菜素-7-O-β-D-葡萄糖醛酸苷	C21H18O11	446.367	7.08	Flavonoids	类黄酮	"29741-09-1"	1123000	312600	253200
Com_1197_pos	trans-zeatin N-glucoside	反式玉米素 N-葡萄糖苷	C16H23N5O6	381.2	4.62	Phytohormones	植物激素		1117000	2638000	3143000
Com_879_pos	Diisobutyl phthalate	邻苯二甲酸二异丁酯	C16H22O4	278.152	13.44	Benzoic acids and derivatives	苯甲酸及其衍生物	"84-69-5"	1114000	1930000	1727000
Com_1243_pos	2,6-Diaminooimelic Acid	2,6-二氨基庚二酸	C7H14N2O4	190.197	0.94	Organic Acid And Its Derivatives	有机酸及其衍生物	"583-93-7"	1108000	2989000	2466000
Com_1601_pos	O-Acetyl-L-homoserine	O-乙酰基-L-高丝氨酸	C6H11NO4	197.617	1	Amino Acid And Derivatives	氨基酸及其衍生物	"250736-84-6"	1100000	1435000	1580000
Com_460_neg	1-O-b-D-glucopyranosyl sinapate	1-O-B-D-吡喃葡萄糖基芥酸盐	C17H22O10	386.351	5.88	Polyphenol	多酚	"78185-48-5"	1097995	1307000	1353000
Com_1164_pos	N-Acetyl-D-galactosamine	N-乙酰-D-半乳糖胺	C8H15NO6	221.09	1	Carbohydrates And Its Derivatives	糖类及其衍生物	"1811-31-0"	1096000	1344000	1113000
Com_1464_pos	IAA-Glu	吲哚乙酸-谷氨酸	C15H16N2O5	304.298	0.72	Phytohormones	植物激素		1094000	696900	651100
Com_444_neg	D-Glutamic acid	D-谷氨酸	C5H9NO4	147.129	2.31	Amino Acid And Derivatives	氨基酸及其衍生物	"6893-26-1"	1091000	130600	128700
Com_1333_pos	Octadeca-11E,13E,15Z-trienoic acid	十八碳-9E,13E,15Z-三烯酸	C18H30O2	278.2	13.5	Fatty Acyls	脂肪酰类	"25575-00-2"	1086000	2103000	1813000
Com_698_neg	D-Erythronolactone	赤酮酸内酯	C4H6O4	118.027	4.05	Lactones	内酯	"15667-21-7"	1082000	672500	664300
Com_740_neg	Homovanillic acid	高香草酸	C9H10O4	182.17	6.091	Organic Acid And Its Derivatives	有机酸及其衍生物	"306-08-1"	1081000	356200	417100
Com_311_neg	Daphnetin	瑞香素	C9H6O4	178.14	6.126	Coumarins and derivatives	香豆素及其衍生物	"486-35-1"	1075000	300000	275800
Com_455_neg	E-3,4,5'-Trihydroxy-3'-glucopyranosylstilbene	E-3,4,5’-三羟基-3’-吡喃葡萄糖基二苯乙烯	C20H22O9	406.4	6.23	Phenylpropanoids and polyketides	苯丙素和聚酮化合物	"29884-49-9"	1072536	1124000	1115000
Com_830_pos	Gly-Phe	甘氨酰-苯丙氨酸	C11H14N2O3	222.24	4.88	Amino Acid And Derivatives	氨基酸及其衍生物	"3321-03-7"	1070000	1745000	1614000
Com_169_neg	Melibiose	蜜二糖	C12H22O11	342.3	0.96	Carbohydrates And Its Derivatives	糖类及其衍生物	"585-99-9"	1067000	150200000	132500000
Com_1078_pos	Glycyl-L-leucine	N-甘氨酰-L-亮氨酸	C8H16N2O3	188.22	4.466	Amino Acid And Derivatives	氨基酸及其衍生物	"869-19-2"	1067000	2181000	2123000
Com_204_neg	Hesperidin	橙皮苷	C28H34O15	610.56	7.09	Flavanones	黄烷酮	"520-26-3"	1066000	177900000	175300000
Com_559_neg	beta-Hydroxyisobutyrate	β-羟基异丁酸	C4H8O3	104.104	2.4	Organic Acid And Its Derivatives	有机酸及其衍生物	"2068-83-9"	1061000	360700	389900
Com_1308_pos	Salicylamide	水杨酰胺	C7H7NO2	137.048	0.92	Phenolamides	酚胺	"65-45-2"	1055000	819100	861100
Com_875_pos	Dihydrocoumarin	二氢香豆素	C9H8O2	148.159	7.158	Phenylpropanoids	苯丙素类	"119-84-6"	1052000	299100	360300
Com_131_neg	Riboflavin-5'-monophosphate	2,6-蒽二酚	C17H21N4O9P	456.344	0.91	Phenols And Its Derivatives	酚类及其衍生物	"146-17-8"	1049000	3519000	3134000
Com_511_neg	2,2-Dimethylsuccinic acid	2,2-二甲基琥珀酸	C6H10O4	146.058	0.84	Organic Acid And Its Derivatives	有机酸及其衍生物	"597-43-3"	1044000	816800	974100
Com_1717_pos	Neocryptotanshinone	新隐丹参酮	C19H22O4	314.376	12.151	Quinones	醌类	"109664-02-0"	1043225	997800	829700
Com_1732_pos	methylApigenin C-pentoside	甲基芹菜素-C-戊糖	C21H20O9	416.378	1.01	Flavonoids	类黄酮		1038000	677100	672000
Com_1776_pos	Levodopa	左旋多巴	C9H11NO4	197.19	1.019	Amino Acid And Derivatives	氨基酸及其衍生物	"59-92-7"	1035000	487100	592100
Com_1112_pos	D-Asparagine	D-天冬酰胺	C4H8N2O3	132.118	0.96	Amino Acid And Derivatives	氨基酸及其衍生物	"2058-58-4"	1027000	3281000	4114000
Com_1665_pos	8-Hydroxyguanosine	8-羟基鸟苷	C10H13N5O6	299.24	3.09	Nucleotide And Its Derivates	核苷酸及其衍生物	"3868-31-3"	1025000	406800	400000
Com_1157_pos	L-Citrulline	L-瓜氨酸	C6H13N3O3	175.19	0.89	Amino Acid And Derivatives	氨基酸及其衍生物	"372-75-8"	1011000	2363000	2248000
Com_856_pos	trans-Citral	柠檬醛	C10H16O	152.233	6.2	Terpenoids	萜类	"5392-40-5"	1011000	264400	281800
Com_1602_pos	Oleamide	油酸酰胺	C18H35NO	281.477	15.12	Fatty Acyls	脂肪酰类	"301-02-0"	997100	27970000	26140000
Com_957_pos	Azelaic acid	壬二酸	C9H16O4	188.22	7.433	Organic Acid And Its Derivatives	有机酸及其衍生物	"123-99-9"	994700	310500	320200
Com_799_pos	Vaccarin	王不留行黄酮苷	C32H38O19	726.633	5.898	Flavones and Flavonols	黄酮和黄酮醇	"53452-16-7"	993100	412400	355300
Com_188_neg	Methyl furan-2-carboxylate	2-糠酸甲酯	C6H6O3	126.11	1.25	Organoheterocyclic compounds	有机杂环化合物	"611-13-2"	989934	469500	433700
Com_49_neg	Ophiopogonanone C	麦冬黄烷酮 C	C19H16O7	356.332	5.38	Flavonoids	类黄酮	"477336-75-7"	987520	1161000	1241000
Com_74_neg	Ethyl ferulate	阿魏酸乙酯	C12H14O4	222.24	9.8	Cinnamic acids and derivatives	肉桂酸及其衍生物	"4046-02-0"	978984	437900	411200
Com_1771_pos	Complanatuside	沙苑子苷	C28H32O16	624.544	7.13	Flavonoids	类黄酮	"116183-66-5"	969338	493600	495200
Com_249_neg	Myricetin 3-O-rutinoside	杨梅素3-O-芸香苷	C27H30O17	626.148	6.08	Flavonoids	类黄酮		969211	371000	374300
Com_250_neg	Jasmonic acid	茉莉酸	C12H18O3	210.27	8.98	Phytohormones	植物激素	"3572-66-5"	964500	1026000	1109000
Com_1046_pos	Chrysin C-hexoside	白杨素 C-己糖苷	C21H20O9	416.2	6.38	Flavones and Flavonols	黄酮和黄酮醇		962695	2834000	2219000
Com_1583_pos	Chrysoeriol O-glucuronic acid	金圣草黄素 O-葡萄糖醛酸	C22H20O12	476.394	7.08	Flavonoids	类黄酮		941700	203800	223400
Com_692_neg	D-Glucose 1-phosphate	葡萄糖-1-磷酸	C6H13O9P	260.136	0.86	Carbohydrates And Its Derivatives	糖类及其衍生物		936800	2544000	2478000
Com_452_neg	Creatine	肌酸	C4H9N3O2	131.133	1.95	Amino Acid And Derivatives	氨基酸及其衍生物	"57-00-1"	935400	7786000	8033000
Com_984_pos	Dl-Dihydrosphingosine	DL-二氢鞘氨醇	C18H39NO2	301.508	10.41	Amines	胺类	"3102-56-5"	922500	1599000	1319000
Com_273_neg	alpha-D-Galactose 1-phosphate	α-D-半乳糖-1-磷酸	C6H13O9P	260.136	0.87	Carbohydrates And Its Derivatives	糖类及其衍生物	"2255-14-3"	922000	15170000	15670000
Com_1300_pos	Erucamide	芥酸酰胺	C22H43NO	337.583	15.77	Fatty Acyls	脂肪酰类	"112-84-5"	913400	879900	829300
Com_194_neg	2-Hydroxybutyric acid	2-羟基丁酸	C4H8O3	104.1	2.741	Organic Acid And Its Derivatives	有机酸及其衍生物	"600-15-7"	908700	517200	529300
Com_831_pos	Gly-Tyr	甘氨酰-酪氨酸	C11H14N2O4	238.24	3.09	Amino Acid And Derivatives	氨基酸及其衍生物	"658-79-7"	907900	1839000	1742000
Com_269_neg	Sodium ferulate	阿魏酸钠	C10H9NaO4	216.17	6.81	Cinnamic acids and derivatives	肉桂酸及其衍生物	"24276-84-4"	907600	49690000	49790000
Com_79_neg	Methyl protocatechuate	3,4-二羟基苯甲酸甲酯	C8H8O4	168.15	6.97	Benzoic acids and derivatives	苯甲酸及其衍生物	"2150-43-8"	904400	411100	557200
Com_305_neg	alpha,alpha-Trehalose	海藻糖	C12H22O11	342.296	0.962	Carbohydrates And Its Derivatives	糖类及其衍生物	"99-20-7"	903700	124300000	94410000
Com_268_neg	L-Sorbose	L-山梨糖	C6H12O6	180.16	0.89	Carbohydrates And Its Derivatives	糖类及其衍生物	"87-79-6"	892300	3824000	3958000
Com_1242_pos	L-Homocarnosine	L-高肌肽	C10H16N4O3	240.259	6.28	Organic Acid And Its Derivatives	有机酸及其衍生物	"3650-73-5"	887500	1154000	1048000
Com_223_neg	Ureidosuccinic acid	氨基甲酰-DL-天冬氨酸	C5H8N2O5	176.13	1.031	Amino Acid And Derivatives	氨基酸及其衍生物	"923-37-5"	879500	393200	390500
Com_252_neg	cis-4-Hydroxy-D-proline	顺式-4-羟基-D-脯氨酸	C5H9NO3	131.13	2.26	Organic Acid And Its Derivatives	有机酸及其衍生物	"2584-71-6"	875700	491000	511800
Com_568_neg	Isorhamnetin	异鼠李素	C16H12O7	316.262	8.969	Flavones and Flavonols	黄酮和黄酮醇	"480-19-3"	874900	1111000	1243000
Com_1744_pos	di-C,C-hexosyl-methylluteolin	芹菜素C,C-二己糖-甲基木犀草素	C28H32O16	624.544	5.81	Flavonoids	类黄酮		870300	168700000	156900000
Com_187_neg	4-Hydroxy-2,5-dimethyl-3(2H)furanone	呋喃酮	C6H8O3	128.13	5.13	Organoheterocyclic compounds	有机杂环化合物	"3658-77-3"	869000	289800	318700
Com_1150_pos	Naringenin O-malonylhexoside	柚皮素O-丙二酰己糖苷	C24H24O13	520.447	7.46	Flavanones	黄烷酮		866600	188700	149000
Com_58_neg	Chrysoeriol 6-C-pentosyl-O-rutinoside	金圣草黄素 6-C-戊糖基-O-芸香糖苷	C33H40O19	741.1	6.08	Flavonoids	类黄酮		865866	315700	313000
Com_834_pos	Homocysteic acid	同型半胱氨酸	C4H9NO5S	183.18	1.83	Amino Acid And Derivatives	氨基酸及其衍生物	"1001-13-4"	858300	2144000	2203000
Com_777_pos	N',N'',N'''-Tri-p-cinnamoylagmatine	N', N'', N'''-三肉桂酰胍丁胺	C32H32N4O3	520.6	5.89	Amines	胺类		857000	599400	725900
Com_195_neg	N-Acetyl-L-methionine	N-乙酰-L-蛋氨酸	C7H13NO3S	191.25	5.315	Amino Acid And Derivatives	氨基酸及其衍生物	"65-82-7"	856266	184900	183600
Com_921_pos	Lipoamide	(+/-)-α-硫辛酰胺	C8H15NOS2	205.341	4.89	Organoheterocyclic compounds	有机杂环化合物	"940-69-2"	850200	2136000	1870000
Com_473_neg	Succinic anhydride	丁二酸酐	C4H4O3	100.073	0.88	Organic Acid And Its Derivatives	有机酸及其衍生物	"108-30-5"	840900	13660000	13080000
Com_1763_pos	Hyoscyamine	(-)-莨菪碱	C17H23NO3	289.37	6.086	Alkaloids and derivatives	生物碱及其衍生物	"101-31-5"	833186	565600	521800
Com_681_neg	Fructose	D-(-)-果糖	C6H12O6	180.16	0.92	Carbohydrates And Its Derivatives	糖类及其衍生物	"57-48-7"	822200	4105000	4497000
Com_1416_pos	VitaMin U	维生素U	C6H14ClNO2S	199.7	0.75	Vitamins	维生素	"3493-12-7"	821500	408400	414300
Com_365_neg	Aminomalonic acid	氨基丙二酸	C3H5NO4	119.022	0.88	Amino Acid And Derivatives	氨基酸及其衍生物	"1068-84-4"	818300	404900	339200
Com_1766_pos	Coumarin	香豆素	C9H6O2	146.14	8.133	Coumarins and derivatives	香豆素及其衍生物	"91-64-5"	815700	284400	277900
Com_1366_pos	Val-Ser	缬氨酰-丝氨酸	C8H16N2O4	204.224	1.01	Amino Acid And Derivatives	氨基酸及其衍生物	"13588-94-8"	815400	1101000	980200
Com_1041_pos	Benzamide	苯甲酰胺	C7H7NO	121	4.56	Benzene and substituted derivatives	苯及其取代衍生物	"55-21-0"	811900	547800	444300
Com_327_neg	L-Arabinitol	L-(-)-阿拉伯醇	C5H12O5	152.15	0.925	Sugar Alcohols	糖醇	"7643-75-6"	809600	476500	489300
Com_203_neg	Ferulic Acid	阿魏酸	C10H10O4	194.19	6.881	Polyphenol	多酚	"1135-24-6"	804500	43270000	42990000
Com_1008_pos	S-ribosyl-L-homocysteine	S-核糖基-L-同型半胱氨酸	C9H17NO6S	267.3	0.91	Amino Acid And Derivatives	氨基酸及其衍生物		795700	1174000	1253000
Com_123_neg	Orcinol glucoside	苔黑酚葡萄糖苷	C13H18O7	286.28	9.914	Phenols And Its Derivatives	酚类及其衍生物	"21082-33-7"	793700	767000	810100
Com_1784_pos	1-Methylnicotinamide	1-甲基烟酰胺	C7H9N2O+	137.159	2.68	Pyridines and derivatives	吡啶及其衍生物	"3106-60-3"	786900	1437000	1333000
Com_1276_pos	Tropine	托品醇	C8H15NO	141.21	1.05	Alkaloids and derivatives	生物碱及其衍生物	"120-29-6"	783665	375500	438500
Com_1568_pos	Nitidine	两面针碱	C21H18NO4	348.379	7.77	Quinolines and derivatives	喹啉及其衍生物	"6872-57-7"	781917	610500	648700
Com_1120_pos	Phosphocreatine	磷酸肌酸	C4H10N3O5P	211.113	2.5	Amino Acid And Derivatives	氨基酸及其衍生物	"67-07-2"	781300	5947000	5738000
Com_1077_pos	5-Methylcytosine	5-甲基胞嘧啶	C5H7N3O	125.13	0.991	Nucleotide And Its Derivates	核苷酸及其衍生物	"554-01-8"	778700	954700	743600
Com_134_neg	Sakuranetin	樱花素	C16H14O5	286.279	1.01	Flavanones	黄烷酮	"2957-21-3"	773700	378000	344500
Com_623_neg	(R)-Mandelic acid	D-扁桃酸	C8H8O3	152.147	5.661	Benzene and substituted derivatives	苯及其取代衍生物	"611-71-2"	773700	114500	93000
Com_232_neg	Ribitol	核糖醇	C5H12O5	152.15	0.927	Sugar Alcohols	糖醇	"488-81-3"	771400	1484000	1464000
Com_1281_pos	Glycyl-L-valine	甘氨酰-L-缬氨酸	C7H14N2O3	174.2	2.077	Amino Acid And Derivatives	氨基酸及其衍生物	"1963-21-9"	770900	3281000	3063000
Com_1035_pos	Luteolin 8-C-hexosyl-O-hexoside	木犀草素 8-C-己糖苷-O-己糖苷	C27H30O16	610.2	6.4	Flavonoids	类黄酮		767400	3818000	2610000
Com_1381_pos	Vanillactic acid	钒酸	C10H12O5	212.199	9.2	Phenylpropanoids and polyketides	苯丙素和聚酮化合物	"2475-56-1"	756100	488900	484600
Com_832_pos	glutathione disulfide	L-谷胱甘肽	C20H32N6O12S2	612.631	1.81	Amino Acid And Derivatives	氨基酸及其衍生物	"27025-41-8"	751400	2916000	3015000
Com_618_neg	Artemisic acid	青蒿酸	C15H22O2	234.334	13.19	Terpenoids	萜类	"80286-58-4"	739100	628000	712300
Com_106_neg	ethylmalonate	乙基丙二酸	C5H8O4	132.042	1.82	Fatty Acyls	脂肪酰类	"601-75-2"	731600	347600	354000
Com_825_pos	N-Benzyllinoleamide	N-(9Z,12Z)十八碳二烯酰胺	C25H39NO	369.591	7.51	Fatty Acyls	脂肪酰类	"18286-71-0"	730100	120100	176600
Com_1663_pos	N-glycyl-L-proline	N-苷氨-L-脯氨酸	C5H10N2O4	162.144	2.45	Amino Acid And Derivatives	氨基酸及其衍生物		726900	379800	388200
Com_1578_pos	3-Methylxanthine	3-甲基黄嘌呤	C6H6N4O2	166.137	4.73	Purines and purine derivatives	嘌呤及其衍生物	"1076-22-8"	726700	180500	192700
Com_1540_pos	5-Methylcytidine	5-甲基胞苷	C10H15N3O5	257.24	1.036	Nucleotide And Its Derivates	核苷酸及其衍生物	"2140-61-6"	724100	688600	655500
Com_277_neg	Warfarin Sodium	华法林钠	C19H15O4	330.31	5.56	Coumarins and derivatives	香豆素及其衍生物	"129-06-6"	720600	473900	458100
Com_437_neg	D-Xylose	D-木糖	C5H10O5	150.131	1.01	Carbohydrates And Its Derivatives	糖类及其衍生物	"58-86-6"	717800	701500	650900
Com_465_neg	Dl-Glyceraldehyde 3-phosphate	DL-甘油醛-3-磷酸	C3H7O6P	169.998	2.76	Carbohydrates And Its Derivatives	糖类及其衍生物	"591-59-3"	709300	690700	746100
Com_1259_pos	trans-zeatin 9-O-glucoside	反式玉米素 O-葡萄糖苷	C16H23N5O6	381.1	4.49	Phytohormones	植物激素		696400	211800	159800
Com_23_neg	(9Z,11E)-Octadecadienoic acid	(9Z,11E)-十八碳二烯酸	C18H32O2	280.24	4.33	Fatty Acyls	脂肪酰类	"2540-56-9"	693400	1360000	1354000
Com_545_neg	Nicotinamide N-oxide	N-氧代烟酰胺	C6H6N2O2	138.12	18.288	Vitamins	维生素	"1986-81-8"	688200	686200	735700
Com_1455_pos	Geraniol	香叶醇	C10H18O	154.25	10.825	Terpenoids	萜类	"106-24-1"	676300	16580000	14070000
Com_1286_pos	H-Gly-Pro-OH	甘氨酰-L-脯氨酸	C7H12N2O3	172.18	1.035	Amino Acid And Derivatives	氨基酸及其衍生物	"704-15-4"	673800	299800	400300
Com_939_pos	Camelliaside A	山茶苷A	C33H40O20	756.668	6.31	Flavones and Flavonols	黄酮和黄酮醇	"135095-52-2"	672582	470700	435600
Com_931_pos	N-Acetyl-L-Tyrosine	N-乙酰-L-酪氨酸	C11H13NO4	223.225	5.17	Amino Acid And Derivatives	氨基酸及其衍生物	"537-55-3"	672100	620800	504900
Com_880_pos	pyridoxal	吡哆醛	C8H9NO3	167.16	1.15	Vitamins	维生素	"66-72-8"	671000	113000000	128400000
Com_731_neg	N-Acetyl-L-Tryptophan	N-乙酰-L-色氨酸	C13H14N2O3	246.1	6.72	Amino Acid And Derivatives	氨基酸及其衍生物	"1218-34-4"	669500	460800	484700
Com_676_neg	Isovanillic acid	异香草酸	C8H8O4	168.15	6.1	Benzoic acids and derivatives	苯甲酸及其衍生物	"645-08-9"	666900	1508000	1497000
Com_838_pos	Tricin 4'-O-(syringyl alcohol) ether O-hexoside	苜蓿素 4'-O-丁香醇醚-O-己糖苷	C32H34O15	658.6	7.34	Flavonoids	类黄酮		661398	727100	634800
Com_1233_pos	L-Leucyl-L-phenylalanine	L-亮氨酰-L-苯丙氨酸	C15H22N2O3	278.163	6.25	Amino Acid And Derivatives	氨基酸及其衍生物	"56217-82-4"	660200	316300	278200
Com_1567_pos	Toddalolactone	飞龙掌血内酯	C16H20O6	308.326	8.22	Coumarins and derivatives	香豆素及其衍生物	"483-90-9"	650800	8286000	7911000
Com_1605_pos	Nicotianamine	尼古拉明	C12H21N3O6	303.312	0.86	Amino Acid And Derivatives	氨基酸及其衍生物	"34441-14-0"	646800	3549000	3891000
Com_1511_pos	4-Hydroxybenzoate	对羟基苯甲酸	C7H6O3	138.121	4.12	Benzoic acids and derivatives	苯甲酸及其衍生物	"99-96-7"	643400	2274000	2265000
Com_1400_pos	Asp-phe	天冬氨酸-苯丙氨酸	C13H16N2O5	280.106	5.12	Amino Acid And Derivatives	氨基酸及其衍生物	"13433-09-5"	641200	1422000	1243000
Com_192_neg	2-Methyllactic acid	α-羟基异丁酸	C4H8O3	104.1	2.597	Organic Acid And Its Derivatives	有机酸及其衍生物	"594-61-6"	638700	833600	912000
Com_1186_pos	2-Amino-1,3,4-tetradecanetriol	2-氨基-1,3,4-三醇十四烷	C14H31NO3	261.4	1.18	Fatty Acyls	脂肪酰类		634100	222000	208100
Com_1494_pos	p-Coumaraldehyde	香豆醛	C9H8O2	148.159	0.89	Phenylpropanoids and polyketides	苯丙素和聚酮化合物	"2538-87-6"	624600	304100	291300
Com_219_neg	N-Acetylornithine	N-乙酰-L-鸟氨酸	C7H14N2O3	174.2	0.896	Amino Acid And Derivatives	氨基酸及其衍生物	"6205-08-9"	623300	398400	413000
Com_1227_pos	L-serine	丝氨酸	C3H7NO3	105.093	0.846	Amino Acid And Derivatives	氨基酸及其衍生物	"56-45-1"	621200	845500	941700
Com_1624_pos	Ferulic acid O-hexoside	阿魏酸O-己糖苷	C16H20O9	356.32	5.86	Cinnamic acids and derivatives	肉桂酸及其衍生物		614418	449800	535000
Com_894_pos	p-Anisaldehyde	p-茴香醛	C8H8O2	136.15	8.43	Pyridines and derivatives	吡啶及其衍生物	"123-11-5"	612700	493300	508700
Com_886_pos	Coumaroyl choline	香豆酰胆碱	C14H20NO3	250	5.29	Coumarins and derivatives	香豆素及其衍生物		609700	905300	953000
Com_432_neg	2'-Hydroxygenistein	羟基金雀异黄素	C15H10O6	286.048	8.02	Isoflavonoids	异黄酮	"1156-78-1"	602600	368800	415500
Com_401_neg	1,11-Undecanedicarboxylic acid	十三烷二酸	C13H24O4	244.33	10.093	Organic Acid And Its Derivatives	有机酸及其衍生物	"505-52-2"	597800	416600	444900
Com_613_neg	2-Acetylpyrazine	2-乙酰基吡嗪	C6H6N2O	122.12	7.4	Carbonyl compounds	醛酮类	"22047-25-2"	597500	4566000	4731000
Com_735_neg	Rosmarinic acid-3'-O-glucoside	迷迭香酸-3'-O-葡萄糖苷	C24H26O13	522.137	6.54	Phenolic acids	酚酸类	"910028-78-3"	594300	395500	501300
Com_1361_pos	Demethylnobiletin	去甲基川陈皮素	C20H20O8	388.368	11.52	Flavones and Flavonols	黄酮和黄酮醇	"2174-59-6"	593100	381000000	376800000
Com_768_pos	Tetrahydroberberine	四氢小檗碱	C20H21NO4	339.39	7.39	Alkaloids and derivatives	生物碱及其衍生物	"522-97-4"	591400	245700	217400
Com_19_neg	Sinapyl Alcohol	芥子醇	C11H14O4	210.226	5.92	Phenols And Its Derivatives	酚类及其衍生物	"537-33-7"	587115	145400	198400
Com_255_neg	Ala-trp	L-丙氨酰-L-色氨酸	C14H17N3O3	275.303	0.9	Amino Acid And Derivatives	氨基酸及其衍生物	"16305-75-2"	582300	2212000	2064000
Com_948_pos	Adenosine O-ribose	腺苷O-核糖	C15H21N5O8	399.39	3.45	Nucleotide And Its Derivates	核苷酸及其衍生物		579900	582800	551100
Com_6_neg	L-Histidine	L-组氨酸	C6H9N3O2	155.15	0.76	Amino Acid And Derivatives	氨基酸及其衍生物	"71-00-1"	576900	1468000	1569000
Com_688_neg	Sucrose	D-(+)-蔗糖	C12H22O11	342.116	0.98	Carbohydrates And Its Derivatives	糖类及其衍生物	"57-50-1"	573200	85800000	84910000
Com_422_neg	Allysine	烯丙酯	C6H11NO3	145.074	1.11	Amino Acid And Derivatives	氨基酸及其衍生物	"1962-83-0"	572200	175400	139600
Com_853_pos	C-pentosyl-apigenin O-rhamnosyl-O-hexoside	C-戊糖基-芹菜素O-鼠李糖基-O-己糖苷	C32H38O18	710.643	7.1	Flavonoids	类黄酮		571505	1283000	739800
Com_1787_pos	5-Methyl-dl-tryptophan	5-甲基-DL-色氨酸	C12H14N2O2	218.252	1.06	Amino Acid And Derivatives	氨基酸及其衍生物	"951-55-3"	569900	531900	574000
Com_1489_pos	Polygodial	水蓼二醛	C15H22O2	234.334	12.92	Terpene	萜烯	"6754-20-7"	566300	591900	562000
Com_1657_pos	D-Myo-inositol 4-monophosohate	D-纤维醇-4-磷酸	C6H13O9P	260.136	0.92	Organic Acid And Its Derivatives	有机酸及其衍生物	"46495-39-0"	566100	2677000	3072000
Com_1305_pos	Indole-3-acetamide	吲哚-3-乙酰胺	C10H10N2O	174.199	0.82	Indoles and derivatives	吲哚及其衍生物	"879-37-8"	562000	4060000	4195000
Com_1109_pos	3-Hydroxy-3-Methylpentane-1,5-Dioic Acid	3-羟基-3-甲基谷氨酸	C6H10O5	162.141	5.9	Amino Acid And Derivatives	氨基酸及其衍生物	"503-49-1"	560500	3001000	3067000
Com_660_neg	Chrysoeriol O-acetylhexoside	金圣草黄素 O-乙酰基己糖苷	C24H24O12	504.1	4.81	Flavonoids	类黄酮		559070	149200	132900
Com_1483_pos	Sauchinone	三白草酮	C20H20O6	356.369	12.072	Organoheterocyclic compounds	有机杂环化合物	"177931-17-8"	549950	310900	335400
Com_672_neg	Licoagroside D	刺果甘草苷D	C22H24O10	448.426	11.44	Alcohols and polyols	醇类和多元醇类	"464196-55-2"	549749	141400	147800
Com_1490_pos	p-Nitroaniline	4-硝基苯胺	C6H6N2O2	138.124	2.02	Benzene and substituted derivatives	苯及其取代衍生物	"100-01-6"	549100	221400	162500
Com_479_neg	Ingenol	巨大戟醇	C20H28O5	348.433	9	Terpenoids	萜类	"30220-46-3"	548100	101500	87990
Com_848_pos	6-Paradol	必理通	C17H26O3	278.39	12.85	Benzene and substituted derivatives	苯及其取代衍生物	"27113-22-0"	547400	7022000	6423000
Com_999_pos	Cyclen	轮环藤宁	C8H20N4	172.27	0.71	Amines	胺类	"294-90-6"	546800	648100	526900
Com_708_neg	3-Hydroxypropanoic acid	3-羟基丙酸	C3H6O3	90.032	1.21	Organic Acid And Its Derivatives	有机酸及其衍生物	"503-66-2"	544200	1007000	1075000
Com_1555_pos	Neotame	纽甜	C20H30N2O5	378.469	5.56	Amino Acid And Derivatives	氨基酸及其衍生物	"165450-17-9"	544000	305000	325600
Com_41_neg	3-Phenyllactic acid	3-苯基乳酸	C9H10O3	166.174	6.81	Phenylpropanoids and polyketides	苯丙素和聚酮化合物	"828-01-3"	541800	2179000	2292000
Com_639_neg	Sibiricose A3	西伯利亚远志糖 A3	C19H26O13	462.137	5	Phenolic acids	酚酸类	"139726-39-9"	540844	187700	208500
Com_338_neg	N-Acetylphenylalanine	N-乙酰苯丙氨酸	C11H13NO3	207.226	6.82	Amino Acid And Derivatives	氨基酸及其衍生物	"2018-61-3"	540700	1445000	1370000
Com_390_neg	Liquiritin	甘草苷	C21H22O9	418.39	6.98	Flavanones	黄烷酮	"551-15-5"	533900	129800	134700
Com_1310_pos	(-)-Carvone	左旋香芹酮	C10H14O	150.218	9.22	Terpenoids	萜类	"6485-40-1"	532300	316400	233300
Com_481_neg	3-Phenylpropanoic acid	3-苯丙酸	C9H10O2	150.174	0.7	Cinnamic acids and derivatives	肉桂酸及其衍生物	"501-52-0"	532100	606400	621300
Com_178_neg	Acacetin O-acetyl hexoside	金合欢素 O-乙酰己糖苷	C24H24O11	488.1	5.69	Flavones and Flavonols	黄酮和黄酮醇		531900	636100	661000
Com_763_pos	Tomatidine	番茄碱	C27H45NO2	415.652	6.76	Alkaloids and derivatives	生物碱及其衍生物	"77-59-8"	528634	358800	340200
Com_1418_pos	Thiamine	硫胺素	C12H17N4OS+	265.354	0.81	Vitamins	维生素	"70-16-6"	524400	701400	337300
Com_240_neg	3-Hydroxyoctadecanoic Acid	3-羟基十八烷酸	C18H36O3	300.267	13.6	Fatty Acyls	脂肪酰类	"45261-96-9"	522900	640000	743800
Com_404_neg	Glycolic acid	乙醇酸	C2H4O3	76.05	0.99	Organic Acid And Its Derivatives	有机酸及其衍生物	"79-14-1"	519300	436000	460900
Com_1047_pos	4',6,7-Trihydroxyisoflavone	6-羟基大豆苷元	C15H10O5	270.241	6.97	Isoflavonoids	异黄酮	"17817-31-1"	518200	1965000	1777000
Com_536_neg	Guanidinoethyl Sulfonate	眯基牛磺酸	C3H9N3O3S	167.187	1.03	Organic Acid And Its Derivatives	有机酸及其衍生物	"543-18-0"	517800	291400	242800
Com_248_neg	2-Hydroxyisocaproic Acid	2-羟基-4-甲基戊酸	C6H12O3	132.158	6.39	Organic Acid And Its Derivatives	有机酸及其衍生物	"498-36-2"	517300	105600	109800
Com_345_neg	Uridine 5'-monophosphate	尿苷-5-单磷酸	C9H13N2O9P	324.18	1.037	Nucleotide And Its Derivates	核苷酸及其衍生物	"58-97-9"	516800	8811000	7929000
Com_492_neg	4-Chloro-2-hydroxybenzoic acid, 4-chloro salicylic acid	4-氯水杨酸	C7H5ClO3	172.57	9.167	Benzoic acids and derivatives	苯甲酸及其衍生物	"5106-98-9"	515600	173300	217400
Com_44_neg	Sibirioside A	斩龙剑苷A	C21H28O12	472.446	6.46	Cinnamic acids and derivatives	肉桂酸及其衍生物	"173046-19-0"	515546	159600	210100
Com_1373_pos	(-)-3-(3,4-Dihydroxyphenyl)-2-methylalanine	(-)-3-(3,4-二羟基苯基)-2-甲基丙氨酸	C10H13NO4	211.214	4.61	Amino Acid And Derivatives	氨基酸及其衍生物	"555-30-6"	513900	1181000	1091000
Com_129_neg	Arctigenin-4'-O-beta-Gentiobioside	牛蒡子苷元-4'-O-β-龙胆二糖苷	C33H44O16	696.693	6.9	Lignans	木脂素类	"41682-24-0"	511800	153200	201100
Com_477_neg	Rhapontin	勒胖停	C21H24O9	420.41	6.94	Phenylpropanoids and polyketides	苯丙素和聚酮化合物	"155-58-8"	502813	148000	172800
Com_935_pos	N1-Acetylspermine	N1-乙酰精胺	C12H28N4O	244.377	0.88	Amines	胺类	"25593-72-0"	502800	477900	485600
Com_1017_pos	Fraxetin	秦皮素	C10H8O5	208.17	6.277	Phenylpropanoids	苯丙素类	"574-84-5"	502000	249200	234700
Com_118_neg	Olaquindox	喹乙醇	C12H13N3O4	263.253	0.96	Organoheterocyclic compounds	有机杂环化合物	"23696-28-8"	499952	129700	142900
Com_125_neg	(-)-3-Carene	3-蒈烯	C10H16	136.23	18.29	Terpenoids	萜类	"13466-78-9"	497300	467900	486100
Com_748_neg	Saikosaponin C	柴胡皂苷C	C48H78O17	927.136	9.18	Terpenoids	萜类	"20736-08-7"	495023	142100	118400
Com_1376_pos	Fangchinoline	汉防己乙素	C37H40N2O6	608.72	6.424	Lignans	木脂素类	"33889-68-8"	491701	289800	205300
Com_652_neg	4-Ethylphenol	4-乙基苯酚	C8H10O	122.16	7.42	Benzene and substituted derivatives	苯及其取代衍生物	"123-07-9"	490800	3727000	3956000
Com_337_neg	N-Acetylvaline	N-乙酰-DL-缬氨酸	C7H13NO3	159.183	4.41	Amino Acid And Derivatives	氨基酸及其衍生物	"3067-19-4"	490500	105000	115500
Com_1060_pos	5-Methoxy-N,N-dimethyltryptamine	5-甲氧基-N,N-二甲基色胺	C13H18N2O	218.1	6.58	Indoles and derivatives	吲哚及其衍生物	"1019-45-0"	488800	408000	409300
Com_667_neg	6-Phosphogluconic acid	6-磷酸葡萄糖酸	C6H13O10P	276.135	0.91	Carbohydrates And Its Derivatives	糖类及其衍生物	"921-62-0"	484500	1236000	1209000
Com_1673_pos	Methyl oleate	油酸甲酯	C19H36O2	296.488	1.06	Fatty Acyls	脂肪酰类	"112-62-9"	482100	397900	412600
Com_1503_pos	Costunolide	木香烃内酯	C15H20O2	232.32	12.083	Terpenoids	萜类	"553-21-9"	480000	362100	268500
Com_1534_pos	(5-L-Glutamyl)-L-amino acid	5-L-谷氨酰-L-丙氨酸	C8H14N2O5	218.09	1.01	Amino Acid And Derivatives	氨基酸及其衍生物	"5875-41-2"	471400	622100	455400
Com_746_neg	2-Methylpentanedioic acid	2-甲基戊二酸	C6H10O4	146.14	5.012	Organic Acid And Its Derivatives	有机酸及其衍生物	"617-62-9"	466500	208100	200000
Com_704_neg	Dl-3,4-Dihydroxymandelic acid	DL-3,4-二羟基扁桃酸	C8H8O5	184.037	2.41	Phenols And Its Derivatives	酚类及其衍生物	"775-01-9"	463600	267500	295300
Com_78_neg	Methyl 4-hydroxycinnamate	4-羟基肉桂酸甲酯	C10H10O3	178.18	8.76	Phenylpropanoids	苯丙素类	"19367-38-5"	461200	455000	463400
Com_670_neg	dUMP	脱氧尿苷酸	C9H13N2O8P	308.182	0.92	Nucleotide And Its Derivates	核苷酸及其衍生物	"964-26-1"	456600	13510000	12290000
Com_228_neg	Capric acid	正癸酸	C10H20O2	172.265	2.16	Fatty Acyls	脂肪酰类	"334-48-5"	454700	257000	227000
Com_1104_pos	3',4',5'-Tricetin O-rutinoside	3',4',5'-三羟黄酮 O-芸香糖苷	C30H36O16	652.606	6.66	Flavones and Flavonols	黄酮和黄酮醇		448742	414200	333600
Com_1299_pos	Eriodictyol-7-O-glucoside	圣草酚-7-O-葡糖苷	C21H22O11	450.393	5.77	Flavonoids	类黄酮	"38965-51-4"	448600	257300	169000
Com_346_neg	Sibiricose A5	西伯利亚远志糖A5	C22H30O14	518.465	5.421	Phenylpropanoids	苯丙素类	"107912-97-0"	446111	186600	209700
Com_805_pos	Pelargonidin 3-O-malonylhexoside	天竺葵色素-3-O-丙二酰己糖苷	C24H23O13	519.1	7.23	Anthocyanins	花青素		442500	124100	130500
Com_1350_pos	Petunidin 3-O-glucoside	矮牵牛素-3-O-葡萄糖	C22H23O12	479	0.98	Anthocyanins	花青素	"71991-88-3"	442300	2112000	2000000
Com_1290_pos	7-O-Ethylmorroniside	7-O-乙基莫诺苷	C19H30O11	434.435	5.87	Iridoid derivatives	环烯醚萜衍生物	"945721-10-8"	441300	859100	838300
Com_615_neg	Caffeic Acid Phenethyl Ester	咖啡酸苯乙酯	C17H16O4	284.31	10.49	Cinnamic acids and derivatives	肉桂酸及其衍生物	"104594-70-9"	440000	227600	221000
Com_1626_pos	Protopine	原阿片碱	C20H19NO5	353.37	6.91	Alkaloids and derivatives	生物碱及其衍生物	"130-86-9"	438893	239900	280000
Com_1007_pos	N1,N10-Dicoumaroyl spermidine	二香豆酰亚精胺	C25H31N3O4	437.53	6.24	Cinnamic acids and derivatives	肉桂酸及其衍生物		433900	82830	61740
Com_1595_pos	Typhaneoside	香蒲新甙	C34H42O20	770.685	6.32	Flavones and Flavonols	黄酮和黄酮醇	"104472-68-6"	431900	426200	172600
Com_1183_pos	2-Aminoethylphosphonate	2-氨基乙基磷酸酯	C2H8NO3P	125.064	6.47	Organic Acid And Its Derivatives	有机酸及其衍生物	"2041-14-7"	431200	119800	133400
Com_1640_pos	Nerol	橙花醇	C10H18O	154.249	9.95	Terpenoids	萜类	"106-25-2"	431200	681700	499900
Com_1737_pos	Malachite green	孔雀石绿	C23H25ClN2	364.9	9.1	Benzene and substituted derivatives	苯及其取代衍生物	"569-64-2"	429303	418200	405700
Com_357_neg	2'-Hydroxyacetophenone	2'-羟基苯乙酮	C8H8O2	136.148	18.287	Benzene and substituted derivatives	苯及其取代衍生物	"118-93-4"	428900	438300	444600
Com_1307_pos	dUDP	2’-脱氧尿苷5’-二磷酸	C9H14N2O11P2	388.162	7.17	Nucleotide And Its Derivates	核苷酸及其衍生物	"4208-67-7"	428000	86640	65080
Com_1501_pos	Azoxystrobin acid	嘧菌酯酸	C21H15N3O5	389.4	10.49	Ethers	醚类		427800	189900	169400
Com_533_neg	Guaiacol	愈创木酚	C7H8O2	124.137	3.62	Phenols And Its Derivatives	酚类及其衍生物	"90-05-1"	426700	333900	376400
Com_189_neg	Acetyl tryptophan	乙酰色氨酸	C13H14N2O3	246	6.78	Amino Acid And Derivatives	氨基酸及其衍生物	"2280-01-5"	425900	333400	343600
Com_445_neg	Icariside E5	淫羊藿次苷 E5	C26H34O11	522.21	6.56	Phenylpropanoids and polyketides	苯丙素和聚酮化合物	"126176-79-2"	420700	324300	296000
Com_237_neg	alpha-Arbutin	alpha-熊果苷	C12H16O7	272.25	2.33	Carbohydrates And Its Derivatives	糖类及其衍生物	"84380-01-8"	419900	616500	648400
Com_1480_pos	(+)-Tetrandrine	粉防己碱	C38H42N2O6	622.762	6.53	Alkaloids and derivatives	生物碱及其衍生物	"518-34-3"	416600	98510	112400
Com_782_pos	Phthalic anhydride	苯酐	C8H4O3	148	11.61	Organoheterocyclic compounds	有机杂环化合物	"85-44-9"	414400	2097000	1578000
Com_26_neg	Lirioresinol A	鹅掌揪树脂醇 A	C22H26O8	418.162	6.96	Lignans	木脂素类	"21453-71-4"	414300	201900	318100
Com_978_pos	MAG (18:4)	单酰甘油酯 (酰基 18:4)	C21H34O4	350	11.27	Glycerolipids	甘油酯		413500	316000	239500
Com_1344_pos	Isopentenyl adenosine	异戊烯基腺苷	C15H21N5O4	335.358	6.814	Phytohormones	植物激素	"7724-76-7"	411800	773200	762300
Com_1282_pos	3-Chloro-L-tyrosine	3-氯-L-酪氨酸	C9H10ClNO3	215.63	4.071	Amino Acid And Derivatives	氨基酸及其衍生物	"7423-93-0"	409400	416800	416800
Com_929_pos	N-Phenylacetylglycine	苯乙酰甘氨酸	C10H11NO3	193.199	6.55	Amino Acid And Derivatives	氨基酸及其衍生物	"500-98-1"	407100	243000	235500
Com_632_neg	Notopterol	羌活醇	C21H22O5	354.403	10.88	Phenylpropanoids	苯丙素类	"88206-46-6"	406541	296500	302900
Com_1661_pos	Lysopc 14:0	溶血卵磷脂酰胆碱14:0	C22H46NO7P	467.577	11.37	Phospholipid	磷脂	"20559-16-4"	405644	312000	258000
Com_1248_pos	Phenylacetylglutamine	N-苯乙酰基-L-谷氨酰胺	C13H16N2O4	264.277	0.94	Amino Acid And Derivatives	氨基酸及其衍生物	"28047-15-6"	404900	230900	192300
Com_1532_pos	Methionine sulfoxide	蛋氨酸亚砜	C5H11NO3S	165.046	0.75	Amino Acid And Derivatives	氨基酸及其衍生物	"62697-73-8"	403200	1236000	1199000
Com_1686_pos	Calycosin-7-O-beta-D-glucoside	毛蕊异黄酮苷	C22H22O10	446.404	6.581	Flavonoids	类黄酮	"20633-67-4"	400735	287000	190300
Com_1206_pos	3-Amino-4-methylpentanoic acid	3-氨基-4-甲基戊酸	C6H13NO2	131.17	1.862	Amino Acid And Derivatives	氨基酸及其衍生物	"5699-54-7"	400400	310200	219800
Com_1690_pos	D-(+)-Octopine	D-(+)-章鱼碱	C9H18N4O4	246.264	0.73	Amino Acid And Derivatives	氨基酸及其衍生物	"34522-32-2"	398600	832900	810400
Com_916_pos	Terpinyl Acetate	乙酸松油酯	C12H20O2	196.29	1.16	Terpenoids	萜类	"80-26-2"	394928	342300	341300
Com_1648_pos	Pimpinellin	茴芹内酯	C13H10O5	246.216	10.09	Coumarins and derivatives	香豆素及其衍生物	"131-12-4"	394850	182200	136000
Com_46_neg	Hydroxycitric acid	羟基柠檬酸	C6H8O8	208.124	0.9	Organic Acid And Its Derivatives	有机酸及其衍生物	"6205-14-7"	394400	1026000	1028000
Com_1257_pos	Feruloylputrescine	阿魏酸腐胺	C14H20N2O3	264.1	5.04	Cinnamic acids and derivatives	肉桂酸及其衍生物	"501-13-3"	393500	9464000	8738000
Com_1421_pos	Phe-Phe	L-苯丙氨酸-L-苯丙氨酸	C18H20N2O3	312.363	6.51	Amino Acid And Derivatives	氨基酸及其衍生物	"2577-40-4"	391600	227000	219000
Com_1353_pos	Angelol K	当归醇K	C20H24O7	376.406	11.12	Coumarins and derivatives	香豆素及其衍生物	"169736-93-0"	391100	320600	225900
Com_14_neg	Fraxin	秦皮苷	C16H18O10	370.313	5.68	Phenylpropanoids	苯丙素类	"524-30-1"	390700	480500	492300
Com_1184_pos	2'-Deoxycytidine	2'-脱氧胞苷	C9H13N3O4	227.217	1.18	Nucleotide And Its Derivates	核苷酸及其衍生物	"207121-53-7"	388000	1220000	1165000
Com_1069_pos	Fragransin A2		C20H24O5	344.408	10.56	Lignans	木脂素类	"112652-46-7"	387300	210000	170000
Com_114_neg	Pelargonidin chloride	氯化天竺葵素	C15H11ClO5	306.7	6.91	Anthocyanins	花青素	"134-04-3"	386700	81010	87570
Com_558_neg	beta-D-Lactose	β-乳糖	C12H22O11	342.297	1	Carbohydrates And Its Derivatives	糖类及其衍生物	"5965-66-2"	385800	28490000	27380000
Com_791_pos	S-Methyl-5'-thioadenosine	S-甲基-5'-硫腺嘌呤	C11H15N5O3S	297.333	4.94	Nucleotide And Its Derivates	核苷酸及其衍生物		385300	24570000	21560000
Com_637_neg	Lariciresinol-4'-O-glucoside	落叶松脂素-4'-O-葡萄糖苷	C26H34O11	522.211	6.56	Lignans	木脂素类	"143663-00-7"	385000	401600	328600
Com_504_neg	Tanshinlactone	新丹参酮	C17H12O3	264.275	5.2	Steroids and steroid derivatives	类固醇及其衍生物	"105351-70-0"	382912	114600	126000
Com_90_neg	Mannitol	甘露醇	C6H14O6	182.173	0.88	Carbohydrates And Its Derivatives	糖类及其衍生物	"69-65-8"	382000	240100	278100
Com_1513_pos	Pectolinarin	大蓟苷	C29H34O15	622.571	7.86	Flavonoids	类黄酮	"28978-02-1"	380381	226100	280400
Com_1439_pos	Leucomalachite green	隐色孔雀石绿	C23H26N2	330.466	6.76	Benzene and substituted derivatives	苯及其取代衍生物	"129-73-7"	377000	139600	153500
Com_893_pos	Ademetionine	S-腺苷蛋氨酸	C15H22N6O5S	398.44	0.8	Amino Acid And Derivatives	氨基酸及其衍生物	"29908-03-0"	376100	314900	161700
Com_502_neg	Luteolin O-hexosyl-O-hexosyl-O-hexoside	木犀草素 O-己糖基-O-己糖基-O-己糖苷	C33H40O21	772.1	5.52	Anthocyanins	花青素		375500	5489000	6463000
Com_871_pos	Scopolamine	东莨菪碱	C17H21NO4	303.353	5.353	Organic Acid And Its Derivatives	有机酸及其衍生物	"51-34-3"	375210	150200	147400
Com_1379_pos	Quinidine	奎尼丁	C20H24N2O2	324.411	5.831	Alkaloids and derivatives	生物碱及其衍生物	"56-54-2"	374232	204900	194600
Com_572_neg	D-Ribose 5-phophate	D-核糖-5-磷酸	C5H11O8P	230.11	0.89	Organic Acid And Its Derivatives	有机酸及其衍生物	"207671-46-3"	373700	901000	921200
Com_1272_pos	Atractylenolide II	苍术内酯 II	C15H20O2	232.318	12.22	Terpenoids	萜类	"73069-14-4"	372800	221100	139700
Com_1563_pos	Pseudoephedrine	伪麻黄碱	C10H15NO	165.235	4.88	Benzene and substituted derivatives	苯及其取代衍生物	"90-82-4"	370900	167700	254700
Com_1315_pos	Vanillin	香兰素	C8H8O3	152.147	1.02	Phenols And Its Derivatives	酚类及其衍生物	"121-33-5"	368800	500000	512800
Com_686_neg	Ribulose-5-phosphate	核酮糖-5-磷酸	C5H11O8P	230.02	0.93	Carbohydrates And Its Derivatives	糖类及其衍生物		367500	835400	863500
Com_659_neg	5-O-p-Coumaroylquinic acid	5-O-对香豆酰奎宁酸	C16H18O8	338	5.4	Cinnamic acids and derivatives	肉桂酸及其衍生物		367100	586900	631100
Com_1313_pos	Geranylacetone	香叶基丙酮	C13H22O	194.313	5.34	Terpenoids	萜类	"3796-70-1"	363000	9008000	8222000
Com_678_neg	Hydroferulic acid	磷酸异丙酯	C10H12O4	196.2	6.74	Phenylpropanoids and polyketides	苯丙素和聚酮化合物	"1135-23-5"	360600	524700	578800
Com_669_neg	D-Arabinose 5-phosphate	D-阿拉伯糖5-磷酸酯	C5H11O8P	230.11	0.9	Pentose phosphates	磷酸戊糖途径	"13137-52-5"	360400	1529000	1824000
Com_1004_pos	N', N''-DiSinapoylspermidine	二芥子酰亚精胺	C29H39N3O8	557.63	6.3	Phenols And Its Derivatives	酚类及其衍生物		358800	72510	104500
Com_322_neg	D-Mannose 6-phosphate	D-甘露糖-6-磷酸	C6H13O9P	260.136	0.87	Carbohydrates And Its Derivatives	糖类及其衍生物	"723729-16-6"	357200	4494000	3838000
Com_1149_pos	N-Feruloylagmatine	N-阿魏拉明	C15H21N4O3	305.35	1.06	Phenolamides	酚胺		356100	1462000	703700
Com_1592_pos	Rhamnetin	7-氧甲基槲皮素	C16H12O7	316.262	6.88	Flavonoids	类黄酮	"90-19-7"	354800	223500	190200
Com_1423_pos	delta-Hexanolactone	δ-己内酯	C6H10O2	114.142	1	Lactones	内酯	"823-22-3"	354600	515200	494900
Com_721_neg	Guanidineacetic acid	乙酸胍	C3H7N3O2	117.054	1.13	Amino Acid And Derivatives	氨基酸及其衍生物	"352-97-6"	351100	223600	268700
Com_729_neg	Bisdemethoxycurcumin	去二甲氧基姜黄素	C19H16O4	308.328	6.53	Phenylpropanoids and polyketides	苯丙素和聚酮化合物	"33171-05-0"	350100	137400	112900
Com_25_neg	Crepenynic acid	顺式十八碳-9-烯-12-炔酸	C18H30O2	278.225	11.96	Fatty Acyls	脂肪酰类	"2277-31-8"	349900	351600	395600
Com_1269_pos	Campesterol	菜油甾醇	C28H48O	400.689	7.41	Steroids and steroid derivatives	类固醇及其衍生物	"474-62-4"	348139	106200	143300
Com_415_neg	(-)-Jasmonoyl-L-isoleucine	(-)-茉莉酰-L-异亮氨酸	C18H29NO4	323.21	9.94	Phytohormones	植物激素	"120330-93-0"	347500	1311000	1168000
Com_752_neg	Dulcitol	己六醇	C6H14O6	182.17	0.897	Carbohydrates And Its Derivatives	糖类及其衍生物	"608-66-2"	347300	255500	252600
Com_1462_pos	Pyrrole-2-carboxylic acid	吡咯-2-羧酸	C5H5NO2	111.1	5.19	Organoheterocyclic compounds	有机杂环化合物	"634-97-9"	345423	281900	281400
Com_865_pos	Oleoylethanolamide	油酰单乙醇胺	C20H39NO2	325.298	14.61	Amines	胺类	"111-58-0"	344543	203000	180700
Com_890_pos	Trans-Zeatin	反式玉米素	C10H13N5O	219.24	4.588	Phytohormones	植物激素	"1637-39-4"	341100	648700	797800
Com_837_pos	Tricin 5-O-hexoside	苜蓿素 5-O-己糖苷	C23H24O12	492.43	7.19	Flavonoids	类黄酮		341000	98070000	94440000
Com_1216_pos	beta-Alanine	β-氨基丙酸	C3H7NO2	89.093	0.8	Amino Acid And Derivatives	氨基酸及其衍生物	"107-95-9"	340200	209500	202600
Com_498_neg	Phlorizin	根皮苷	C21H24O10	436.41	7.24	Flavonoids	类黄酮	"60-81-1"	334600	2071000	1880000
Com_1318_pos	Sorbic acid	山梨酸	C6H8O2	112.127	6.72	Fatty Acyls	脂肪酰类	"110-44-1"	333800	3902000	3726000
Com_1211_pos	Deoxyarbutin	脱氧熊果苷	C11H14O3	194.23	1.23	Phenols And Its Derivatives	酚类及其衍生物	"53936-56-4"	332100	724800	690400
Com_862_pos	Nε-(1-Carboxymethyl)-L-lysine	Nε-(1-羧甲基)-L-赖氨酸	C8H16N2O4	204.224	0.84	Amino Acid And Derivatives	氨基酸及其衍生物	"5746-04-3"	332000	420700	345300
Com_458_neg	Orotidine	乳清苷	C10H12N2O8	288.211	1	Nucleotide And Its Derivates	核苷酸及其衍生物	"314-50-1"	329300	199900	136700
Com_1230_pos	2-alpha-Linolenoyl-glycerol	2-α-亚麻酸甘油酯	C21H36O4	352.261	11.17	Glycerolipids	甘油酯	"55268-58-1"	328200	351500	262000
Com_1246_pos	Auramine O	金胺O	C17H21N3	267.374	13.59	Amines	胺类	"2465-27-2"	326700	338900	171500
Com_230_neg	s7p	7-磷酸景天庚糖	C7H13BaO10P	425.473	0.87	Carbohydrates And Its Derivatives	糖类及其衍生物	"2646-35-7"	326200	804500	685600
Com_47_neg	Phenprobamate	苯丙氨酯	C10H13NO2	179.216	4.09	Amino Acid And Derivatives	氨基酸及其衍生物	"673-31-4"	324600	283900	300800
Com_1593_pos	Fustin	黄颜木素	C15H12O6	288.252	5.89	Flavanones	黄烷酮	"20725-03-5"	324100	661400	639500
Com_30_neg	dATP	脱氧三磷酸腺苷	C10H16N5O12P3	491.001	0.73	Nucleotide And Its Derivates	核苷酸及其衍生物	"1927-31-7"	322600	206000	226400
Com_483_neg	Cyclic AMP	腺苷-3'-5'-环单磷酸	C10H12N5O6P	329.206	1.75	Nucleotide And Its Derivates	核苷酸及其衍生物	"60-92-4"	319500	5091000	4914000
Com_788_pos	Chrysoeriol C-hexoside	金圣草黄素 C-己糖苷	C22H22O11	462.404	6.72	Flavonoids	类黄酮		319000	109200000	104900000
Com_1346_pos	Hecogenin	海柯皂苷元	C27H42O4	430.628	6.08	Flavonoids	类黄酮	"467-55-0"	314400	5931000	5378000
Com_1002_pos	Longifolene	长叶烯	C15H24	204.35	9.751	Terpenoids	萜类	"475-20-7"	313800	480900	478300
Com_1207_pos	8-Aminooctanoic acid	8-氨基辛酸	C8H17NO2	159.23	4.608	Fatty Acyls	脂肪酰类	"1002-57-9"	312000	101600	88640
Com_135_neg	Pyruvic Acid	丙酮酸	C3H4O3	88.062	4.88	Tca Cycle	三羧酸循环	"127-17-3"	310100	685300	655600
Com_628_neg	Geniposidic acid	京尼平苷酸	C16H22O10	374.34	4.615	Terpenoids	萜类	"27741-01-1"	309500	100100	213900
Com_1091_pos	L-Alanyl-L-Phenylalanine	L-丙氨酰-L-苯丙氨酸	C12H16N2O3	236.116	4.65	Amino Acid And Derivatives	氨基酸及其衍生物	"3061-90-3"	309300	242100	231300
Com_1546_pos	Dihydroxy tomatidine-O-hexosyl-O-rhamnoside	二羟基番茄碱-O-己糖基-O-鼠李糖苷	C39H65NO13	755.93	5.65	Alkaloids and derivatives	生物碱及其衍生物		305901	167400	155500
Com_238_neg	Koaburaside	3,5-二甲氧基-4-羟基苯酚-1-O-葡萄糖苷	C14H20O9	332.111	4.68	Phenolic acids	酚酸类	"41653-73-0"	304400	172600	186700
Com_18_neg	6-Sialyllactose	6'-唾液乳糖	C23H39NO19	633.551	0.73	Carbohydrates And Its Derivatives	糖类及其衍生物	"35890-39-2"	304300	229200	207700
Com_1252_pos	4-Hydroxy-3,5-diisopropylbenzaldehyde	4-羟基-3,5-二异丙基苯甲醛	C13H18O2	206.2	6.07	Benzoic acids and derivatives	苯甲酸及其衍生物	"10537-86-7"	304000	476300	486500
Com_1012_pos	4-D-Hydroxysphinganine	4-羟基鞘氨醇	C18H39NO3	317.507	9.54	Amines	胺类	"554-62-1"	302640	201700	171800
Com_387_neg	Vanillic acid	香草酸	C8H8O4	168.15	5.901	Organic Acid And Its Derivatives	有机酸及其衍生物	"121-34-6"	302200	733000	744400
Com_549_neg	Deoxyinosine	2-脱氧肌苷	C10H12N4O4	252.23	3.33	Nucleotide And Its Derivates	核苷酸及其衍生物	"890-38-0"	301300	51380	63140
Com_51_neg	Palmitaldehyde	棕榈醛	C16H32O	240.425	10.22	Fatty Acyls	脂肪酰类	"629-80-1"	300700	487100	484800
Com_1249_pos	p-Aminobenzoate	对-氨基苯甲酸	C7H7NO2	137.136	4.45	Benzoic acids and derivatives	苯甲酸及其衍生物	"150-13-0"	299000	486000	448000
Com_724_neg	Nerolidol	橙花叔醇	C15H26O	222.37	10.74	Terpenoids	萜类	"7212-44-4"	297400	275800	286500
Com_34_neg	Luteolin-7-O-beta-D-glucuronide	木犀草素-7-O-β-D-葡萄糖醛酸苷	C21H18O12	462.366	6.53	Flavonoids	类黄酮	"29741-10-4"	296700	60570	51800
Com_1475_pos	Isoferulic Acid	异阿魏酸	C10H10O4	194.18	7.008	Cinnamic acids and derivatives	肉桂酸及其衍生物	"537-73-5"	296100	20100000	18410000
Com_280_neg	Pyrroloquinoline quinone	吡咯喹啉醌	C14H6N2O8	330.012	6.17	Quinolines and derivatives	喹啉及其衍生物	"72909-34-3"	295300	256400	429100
Com_961_pos	N',N",N"'-p-coumaroyl-cinnamoyl-caffeoyl spermidine	N',N",N"'-对香豆酰肉桂酰咖啡酰亚精胺	C34H37N3O6	583.67	4.95	Phenolamides	酚胺		294900	501900	443000
Com_573_neg	D-Xylulose 5-phosphate	D-木酮糖-5-磷酸	C5H11O8P	230.11	0.9	Pentose phosphates	磷酸戊糖途径	"4212-65-1"	293700	1295000	1278000
Com_449_neg	Methyl salicylate-2-O-glucoside	水杨酸甲酯-2-O-葡萄糖苷	C14H18O8	314.1	4.8	Phenolic acids	酚酸类	"10019-60-0"	293200	452800	675800
Com_1442_pos	Nicotinic acid adenine dinucleotide	烟碱酸腺嘌呤二核苷酸	C21H28N7O14P2	663.2	1.04	Nucleotide And Its Derivates	核苷酸及其衍生物		292400	1062000	1320000
Com_648_neg	Cyanidin 3-O-glucoside	矢车菊素 3-O-葡萄糖苷	C21H21ClO11	484.84	5.21	Anthocyanins	花青素	"7084-24-4"	290600	143200	140900
Com_95_neg	Methyl-Hesperidin	甲基橙皮苷	C29H38O16	642.59	7.569	Flavonoids	类黄酮	"11013-97-1"	290500	3009000	2902000
Com_539_neg	Heptamethoxyflavone	七甲氧基黄酮	C22H24O9	432.42	7.08	Flavonoids	类黄酮		290300	2766000	2675000
Com_1194_pos	Phellodenol H	黄柏醇H	C17H20O9	368.335	1.02	Coumarins and derivatives	香豆素及其衍生物		289700	467900	459200
Com_872_pos	Verbenalin	马鞭草苷	C17H24O10	388.366	6.019	Terpenoids	萜类	"548-37-8"	289034	181500	148000
Com_77_neg	Gallic acid trimethyl ether	3,4,5-三甲氧基苯甲酸	C10H12O5	212.2	7.83	Benzene and substituted derivatives	苯及其取代衍生物	"118-41-2"	288900	54610	72220
Com_1541_pos	Dodecanedioic acid	十二烷二酸	C12H22O4	230.3	9.452	Organic Acid And Its Derivatives	有机酸及其衍生物	"693-23-2"	288500	83280	66540
Com_1508_pos	LysoPC 20:2	溶血磷脂酰胆碱 20:2	C28H54NO7P	547.7	13.26	Phospholipid	磷脂		287792	153800	144700
Com_544_neg	Thymidine	胸苷	C10H14N2O5	242.23	4.289	Nucleotide And Its Derivates	核苷酸及其衍生物	"50-89-5"	286300	150200	148500
Com_940_pos	5'-Deoxy-5'-(Methylthio)Adenosine	5-脱氧-5-甲硫腺苷	C11H15N5O3S	297.333	4.91	Nucleotide And Its Derivates	核苷酸及其衍生物	"2457-80-9"	285800	17960000	17200000
Com_1761_pos	Maltitol	麦芽糖醇	C12H24O11	344.31	0.914	Fatty Acyls	脂肪酰类	"585-88-6"	285600	236600	186600
Com_1738_pos	Marmesin	异紫花前胡内酯	C14H14O4	246.259	6.4	Phenylpropanoids and polyketides	苯丙素和聚酮化合物	"13849-08-6"	284400	229800	179400
Com_1426_pos	Scopine	东莨菪醇	C8H13NO2	155.19	0.87	Organoheterocyclic compounds	有机杂环化合物	"498-45-3"	282800	221600	198500
Com_264_neg	Galloylpaeoniflorin	没食子酰芍药苷	C30H32O15	632.575	6.78	Terpene	萜烯	"122965-41-7"	280483	192100	222900
Com_110_neg	Engeletin	黄杞苷	C21H22O10	434.393	7.149	Flavonoids	类黄酮	"572-31-6"	278527	152700	186200
Com_930_pos	N-Acetylputrescine	N-乙酰丁二胺	C6H14N2O	130.188	0.75	Amino Acid And Derivatives	氨基酸及其衍生物	"18233-70-0"	278200	303000	289300
Com_753_neg	Pyrogallol	邻苯三酚	C6H6O3	126.11	2.787	Benzene and substituted derivatives	苯及其取代衍生物	"87-66-1"	277300	217500	228900
Com_229_neg	Ribose 1-phosphate	核糖1-磷酸	C5H11O8P	230.11	0.9	Carbohydrates And Its Derivatives	糖类及其衍生物	"14075-00-4"	276700	921200	981500
Com_1358_pos	3-Butylidenephthalide	丁烯基苯酞	C12H12O2	188.226	11.83	Organoheterocyclic compounds	有机杂环化合物	"551-08-6"	272700	8013000	6383000
Com_683_neg	Plantagoside	车前子苷	C21H22O12	466.398	6.09	Flavanones	黄烷酮	"78708-33-5"	272300	204000	186100
Com_1210_pos	Vincamine	长春胺	C21H26N2O3	354.44	7.21	Alkaloids and derivatives	生物碱及其衍生物	"1617-90-9"	271940	359300	361900
Com_1450_pos	Biochanin A 7-O-beta-D-glucoside	生物汉宁A 7-O-葡萄糖苷	C22H22O10	446.404	7.76	Flavonoids	类黄酮		271900	215600	201400
Com_488_neg	Gibberellin A20	赤霉素A20	C19H24O5	332.162	6.69	Phytohormones	植物激素	"19143-87-4"	271200	114500	105500
Com_160_neg	Kinsenoside	金线莲苷	C10H16O8	264.229	3.93	Carbohydrates And Its Derivatives	糖类及其衍生物	"151870-74-5"	270800	395000	431600
Com_1027_pos	epsilon-Caprolactone	ε-己内酯	C6H10O2	114.142	1.048	Lactones	内酯	"502-44-3"	269600	211600	155900
Com_324_neg	Lactose	乳糖	C12H22O11	342.3	0.911	Carbohydrates And Its Derivatives	糖类及其衍生物	"63-42-3"	267200	7376000	7506000
Com_152_neg	Kaempferol	山奈酚	C15H10O6	286.24	8.811	Flavones and Flavonols	黄酮和黄酮醇	"520-18-3"	266600	110900	118600
Com_870_pos	NAA	1-萘乙酸	C12H10O2	186.207	9.29	Organic Acid And Its Derivatives	有机酸及其衍生物	"86-87-3"	266117	317200	226200
Com_908_pos	(+)-Anwulignan	安五脂素	C20H24O4	328.408	6.42	Lignans	木脂素类	"107534-93-0"	263506	199500	142800
Com_779_pos	Putrescine	腐胺	C4H12N2	88.1	0.68	Amines	胺类	"110-60-1"	263300	935100	707700
Com_462_neg	L-Homoserine	L-高丝氨酸	C4H9NO3	119.119	1.9	Amino Acid And Derivatives	氨基酸及其衍生物	"672-15-1"	262900	159500	164800
Com_186_neg	(-)-alpha-Pinene	左旋-alpha-蒎烯	C10H16	136.23	18.287	Terpenoids	萜类	"7785-26-4"	261900	262900	263000
Com_1101_pos	16-Hydroxy-hexadecanoic acid	16-羟基-十六烷酸	C32H62O5	526.832	8.57	Fatty Acyls	脂肪酰类	"871333-53-8"	261800	238300	240900
Com_993_pos	Triethyl citrate	柠檬酸三乙酯	C12H20O7	276.28	9.15	Organic Acid And Its Derivatives	有机酸及其衍生物	"77-93-0"	261100	162000	153200
Com_720_neg	Pinoresinol-glucoside	松脂素单甲基醚-D-葡萄糖苷(松脂醇-4-O-BETA-D-吡喃葡萄糖苷)	C26H32O11	520.526	7.23	Lignans	木脂素类	"69251-96-3"	259100	39350	47200
Com_1463_pos	IAA-Asp	吲哚乙酸-天冬氨酸	C14H14N2O5	290.271	6.78	Phytohormones	植物激素		258800	206400	169300
Com_441_neg	Flavin Adenine Dinucleotide	黄素腺嘌呤二核苷酸	C27H33N9O15P2	785.55	5.16	Nucleotide And Its Derivates	核苷酸及其衍生物	"146-14-5"	258500	167000	182800
Com_1425_pos	Aloin	芦荟甙	C21H22O9	418.39	7.43	Anthracenes	蒽类	"1415-73-2"	257735	103300	140100
Com_1326_pos	N-Feruloylputrescine	N-阿魏酰腐胺	C14H20N2O3	264.32	5.22	Cinnamic acids and derivatives	肉桂酸及其衍生物		257500	6255000	6584000
Com_54_neg	Acetyl-eriodictyol O-hexoside	乙酰基圣草酚 O-己糖苷	C23H24O12	492.1	6.31	Flavonoids	类黄酮		257400	57540	100400
Com_1372_pos	N-Methylnicotinamide	N-甲基烟酰胺	C7H8N2O	136.151	1.84	Pyridines and derivatives	吡啶及其衍生物	"114-33-0"	257100	270700	294300
Com_1612_pos	Methylguanidine	1-甲基胍	C2H7N3	73.0971	0.84	Amines	胺类	"471-29-4"	256000	417400	360400
Com_1667_pos	Rhodomyrtone	罗多米通	C26H34O6	442.54	11.33	Organoheterocyclic compounds	有机杂环化合物		255900	730800	541000
Com_680_neg	Syringetin	丁香亭	C17H14O8	346.069	7.87	Flavones and Flavonols	黄酮和黄酮醇	"4423-37-4"	255800	397300	341800
Com_1419_pos	L-Kynurenine	L-犬尿氨酸	C10H12N2O3	208.21	3.821	Carbonyl compounds	醛酮类	"2922-83-0"	252000	200700	212300
Com_1177_pos	Syringetin 5-O-hexoside	丁香亭 5-O-己糖苷	C23H24O13	508.1	0.97	Flavones and Flavonols	黄酮和黄酮醇		250400	1687000	3093000
Com_1672_pos	methylQuercetin O-hexoside	甲基槲皮素O-己糖苷	C22H22O12	478.409	0.98	Flavonoids	类黄酮		247400	1280000	1206000
Com_430_neg	2-Hydroxy-2-methylbutanoic acid	2-羟基-2-甲基丁酸	C5H10O3	118.13	4.61	Fatty Acyls	脂肪酰类	"3739-30-8"	247200	77440	100900
Com_845_pos	Geranyl acetate	乙酸香叶酯	C12H20O2	196.29	1.2	Fatty Acyls	脂肪酰类	"105-87-3"	246800	363000	427200
Com_175_neg	N-Acetyl-L-aspartate	N-乙酰天冬氨酸	C6H9NO5	175.139	1.65	Amino Acid And Derivatives	氨基酸及其衍生物	"997-55-7"	246800	326600	280700
Com_1671_pos	Selgin 5-O-hexoside	羟甲基黄酮 5-O-己糖苷	C22H22O12	478.4	0.94	Flavonoids	类黄酮		246500	588900	714200
Com_1437_pos	Limocitrin O-hexoside	檬黄素O-己糖苷	C23H24O13	508.43	0.97	Flavonoids	类黄酮		244900	954200	1943000
Com_747_neg	Phenylglyoxylic acid	苯乙醛酸	C8H6O3	150.13	4.881	Benzoic acids and derivatives	苯甲酸及其衍生物	"611-73-4"	244500	100400	110600
Com_217_neg	Salvianolic acid F	丹酚酸F	C17H14O6	314.289	7.189	Phenolic acids	酚酸类	"158732-59-3"	244400	43400	36410
Com_1773_pos	Hydroprotopine	氢化原阿片碱	C20H20NO5+	354.377	6.87	Alkaloids and derivatives	生物碱及其衍生物	"128397-41-1"	244115	209100	203400
Com_1387_pos	Tricin O-malonylhexoside	苜蓿素 O-丙二酰己糖苷	C26H26O15	578.47	7.5	Flavonoids	类黄酮		243500	1786000	1642000
Com_836_pos	Isomaltose	异麦芽糖	C12H22O11	342.297	0.9	Carbohydrates And Its Derivatives	糖类及其衍生物	"499-40-1"	239600	919500	695800
Com_1660_pos	Lysopc 17:0	溶血磷脂酰胆碱17:0	C25H52NO7P	509.657	13.17	Phospholipid	磷脂	"50930-23-9"	239366	89080	60700
Com_1351_pos	Methyl indole-3-acetate	吲哚-3-乙酸甲酯	C11H11NO2	189.21	9.342	Phytohormones	植物激素	"1912-33-0"	239040	103000	95380
Com_769_pos	Thiocolchicoside	硫秋水仙苷	C27H33NO10S	563.62	6.84	Carbohydrates And Its Derivatives	糖类及其衍生物	"602-41-5"	239033	117900	147100
Com_1191_pos	Ononin	芒柄花苷	C22H22O9	430.405	1.04	Isoflavonoids	异黄酮	"486-62-4"	239000	422100	398000
Com_1719_pos	Tanshindiol C	丹参二醇c	C18H16O5	312.317	8.564	Alcohols and polyols	醇类和多元醇类	"97465-71-9"	238500	180000	182200
Com_1175_pos	Syringetin 7-O-hexoside	丁香亭 7-O-己糖苷	C23H24O13	508.1	0.97	Flavones and Flavonols	黄酮和黄酮醇		238300	1250000	2018000
Com_1451_pos	(-)-Borneol	冰片	C10H18O	154.249	1.06	Terpenoids	萜类	"464-45-9"	237600	223500	265600
Com_970_pos	LysoPC 16:2	溶血磷脂酰胆碱 16:2(2n异构)	C24H46NO7P	491.308	11.06	Phospholipid	磷脂		237078	125100	105800
Com_1090_pos	2'-Deoxyinosine 5'-phosphate	2'-脱氧肌苷-5'-单磷酸	C10H13N4O7P	332.052	1.71	Nucleotide And Its Derivates	核苷酸及其衍生物	"3393-18-8"	236700	314000	327500
Com_602_neg	13-HOTrE(r)	13-羟基十八碳三烯酸2	C18H30O3	294	11.36	Fatty Acyls	脂肪酰类	"74784-20-6"	235900	219500	230800
Com_541_neg	L-Fucose	L-岩藻糖	C6H12O5	164.069	0.95	Carbohydrates And Its Derivatives	糖类及其衍生物	"2438-80-4"	233300	351600	383700
Com_72_neg	Matairesinoside	罗汉松脂苷	C26H32O11	520.533	7.38	Lignans	木脂素类	"23202-85-9"	232500	48060	80170
Com_925_pos	Biotin	D-生物素	C10H16N2O3S	244.311	9.02	Vitamins	维生素	"58-85-5"	232000	318300	301500
Com_1723_pos	S-Adenosyl-L-homocysteine	S-(5'-腺苷)-L-高半胱氨酸	C14H20N6O5S	384.411	1.84	Amino Acid And Derivatives	氨基酸及其衍生物	"979-92-0"	231300	1289000	1146000
Com_361_neg	D-Fructose-1,6-biphosphate	D-果糖-1,6 -二磷酸	C6H14O12P2	339.996	0.91	Carbohydrates And Its Derivatives	糖类及其衍生物	"38099-82-0"	229400	1140000	1191000
Com_958_pos	Syringaldehyde	丁香醛	C9H10O4	182.17	6.897	Phenols And Its Derivatives	酚类及其衍生物	"134-96-3"	228800	140600	146500
Com_239_neg	Ribose 5-phosphate	核酮糖-5-磷酸	C5H11O8P	230.02	0.84	Carbohydrates And Its Derivatives	糖类及其衍生物	"4300-28-1"	228700	693500	954500
Com_1037_pos	O-Phosphocholine	磷酸胆碱	C5H15ClNO4P	219.604	0.87	Cholines	胆碱	"107-73-3"	228700	3650000	3772000
Com_1065_pos	Isoalantolactone	异土木香内酯	C15H20O2	232.32	12.49	Terpenoids	萜类	"470-17-7"	228400	110100	96830
Com_1596_pos	Songorine	准葛尔乌头碱	C22H31NO3	357.486	5.57	Alkaloids and derivatives	生物碱及其衍生物	"509-24-0"	227800	124200	113900
Com_1392_pos	C-hexosyl-chrysoeriol O-feruloylhexoside	C-己糖基-金圣草黄素O-阿魏酰己糖苷	C38H40O19	800.71	6.85	Flavonoids	类黄酮		227408	195000	82000
Com_728_neg	Chelidonic acid	白屈菜酸	C7H4O6	184.1	1.46	Alkaloids and derivatives	生物碱及其衍生物	"99-32-1"	227300	52630	32110
Com_7_neg	O-Acetylserine	O-乙酰基-l-丝氨酸	C5H9NO4	147.13	1.056	Amino Acid And Derivatives	氨基酸及其衍生物	"5147-00-2"	226700	256100	248600
Com_1136_pos	Tanshinone II B	丹参酮IIB	C19H18O4	310.347	10.795	Quinones	醌类	"17397-93-2"	225000	1180000	1268000
Com_210_neg	Chrysoeriol O-homovanillic acid	金圣草黄素 O-高香草酸	C25H20O9	464.1	6.56	Flavonoids	类黄酮		224400	46390	44380
Com_1198_pos	LysoPC 16:2 (2n isomer)	溶血磷脂酰胆碱 16:2	C24H46NO7P	491.3	10.88	Phospholipid	磷脂		224211	143700	155200
Com_457_neg	N-lactoyl-phenylalanine	N-乳酰基苯丙氨酸	C12H15NO4	237.25	6.97	Organic Acid And Its Derivatives	有机酸及其衍生物		223700	42430	54320
Com_1460_pos	Isoeugenol	异丁子香酚	C10H12O2	164.2	10.054	Phenylpropanoids	苯丙素类	"97-54-1"	222924	160500	125500
Com_393_neg	1,7-Dimethylxanthine	1,7-二甲基黄嘌呤	C7H8N4O2	180.164	9.96	Purines and purine derivatives	嘌呤及其衍生物	"611-59-6"	221400	248200	242400
Com_431_neg	Pinobanksin	短叶松素	C15H12O5	272.069	7.06	Flavonoids	类黄酮	"548-82-3"	220800	13040000	16630000
Com_956_pos	Bergapten	香柠檬烯	C12H8O4	216.19	9.72	Coumarins and derivatives	香豆素及其衍生物	"484-20-8"	220600	239500000	232100000
Com_712_neg	Maltose	麦芽糖	C12H22O11	342.3	1.01	Carbohydrates And Its Derivatives	糖类及其衍生物	"69-79-4"	216900	7291000	6206000
Com_864_pos	N-Methyl-L-arginine hydrochloride	N'-单甲基-L-精氨酸盐酸盐	C7H17ClN4O2	224.688	0.95	Amino Acid And Derivatives	氨基酸及其衍生物	"156706-47-7"	216100	4978000	3950000
Com_1038_pos	Maltol	麦芽酚	C6H6O3	126.11	5.43	Organoheterocyclic compounds	有机杂环化合物	"118-71-8"	215781	129300	92510
Com_926_pos	Kynurenine	犬尿氨酸	C10H12N2O3	208.214	3.78	Ketones	酮类	"343-65-7"	215300	166800	199200
Com_1452_pos	N-Formylkynurenine	N’-甲酰基犬尿氨酸	C11H12N2O4	236.08	4.17	Carbonyl compounds	醛酮类	"1022-31-7"	214900	155600	139200
Com_995_pos	7,8-Dihydroxy-4-methylcoumarin	7,8-二羟基-4-甲基香豆素	C10H8O4	192.168	6.842	Coumarins and derivatives	香豆素及其衍生物	"2107-77-9"	214600	860000	812700
Com_1587_pos	8-Hydroxy-2-Deoxyguanosine	8-羟基-2-脱氧鸟苷	C10H13N5O5	283.241	0.96	Nucleotide And Its Derivates	核苷酸及其衍生物	"88847-89-6"	214000	148100	138600
Com_396_neg	3-Furoic acid	3-糠酸	C5H4O3	112.08	5.567	Organoheterocyclic compounds	有机杂环化合物	"488-93-7"	213000	145600	158200
Com_478_neg	Orientin	荭草苷	C21H20O11	448.377	6.25	Flavones and Flavonols	黄酮和黄酮醇	"28608-75-5"	212600	42560000	44420000
Com_512_neg	2-O-Caffeoylmalic acid	2-O-咖啡酰苹果酸	C13H12O8	296.053	0.69	Phenolic acids	酚酸类	"53755-04-7"	210000	154800	148400
Com_59_neg	Pelargonidin O-acetylhexoside	天竺葵素 O-乙酰基己糖苷	C23H22O11	474.1	7.39	Anthocyanins	花青素		207700	92730	126800
Com_790_pos	Spermidine	亚精胺	C7H19N3	145.246	0.68	Amines	胺类	"124-20-9"	206700	427300	383600
Com_661_neg	Mandelic acid	扁桃酸	C8H8O3	152.047	4.91	Benzene and substituted derivatives	苯及其取代衍生物	"17199-29-0"	205800	335200	289700
Com_1459_pos	Methyl linoleate	亚油酸甲酯	C19H34O2	294.47	13.221	Fatty Acyls	脂肪酰类	"112-63-0"	205800	129000	113900
Com_184_neg	Cinnamyl acetate	乙酸桂酯	C11H12O2	176.21	0.89	Benzene and substituted derivatives	苯及其取代衍生物	"103-54-8"	205700	192500	204300
Com_1370_pos	alpha-Nicotinamide adenine dinucleotide	α-烟酰胺腺嘌呤二核苷酸	C21H27N7O14P2	663.425	1.04	Nucleotide And Its Derivates	核苷酸及其衍生物	"7298-93-3"	204500	1062000	1310000
Com_706_neg	N-[(-)-Jasmonoyl]-(L)-Isoleucine	茉莉酸-异亮氨酸	C18H29NO4	323.401	9.96	Phytohormones	植物激素		204500	642800	634400
Com_120_neg	Apigenin 5-O-glucoside	芹菜素 5-O-葡萄糖苷	C21H20O10	432.38	6.68	Flavonoids	类黄酮	"28757-27-9"	202900	1050000	1188000
Com_1411_pos	GDP-L-fucose	鸟苷二磷酸岩藻糖	C16H25N5O15P2	589.342	4.13	Nucleotide And Its Derivates	核苷酸及其衍生物	"15839-70-0"	202692	139400	115000
Com_950_pos	Abscisic acid glucose ester	脱落酸葡萄糖酯(ABA-GE)	C21H30O9	426.458	5	Phytohormones	植物激素	"79199-48-7"	201187	156800	155100
Com_1524_pos	(-)-trans-Carveol	香芹醇	C10H16O	152.233	0.73	Terpenoids	萜类	"2102-58-1"	201100	135600	172700
Com_1481_pos	Tabersonine	它勃宁	C21H24N2O2	336.427	7.828	Alkaloids and derivatives	生物碱及其衍生物	"4429-63-4"	200400	133000	157400
Com_254_neg	ATP	三磷酸腺苷	C10H16N5O13P3	507.181	1.04	Nucleotide And Its Derivates	核苷酸及其衍生物	"56-65-5"	200000	139500	150100
Com_1360_pos	Micheliolide	木香内酯	C15H20O3	248.318	10.15	Organoheterocyclic compounds	有机杂环化合物	"68370-47-8"	198900	174600	173300
Com_1526_pos	7-Methylxanthine	7-甲基黄嘌呤	C6H6N4O2	166.049	4.68	Purines and purine derivatives	嘌呤及其衍生物	"552-62-5"	198700	51350	40550
Com_775_pos	N', N''-Dicaffeoylspermidine	N', N''-二咖啡酰亚精胺	C25H31N3O6	469.53	5.57	Amines	胺类		197800	3696000	1992000
Com_1369_pos	Gentiobiose	龙胆二糖	C12H22O11	342.297	1	Carbohydrates And Its Derivatives	糖类及其衍生物	"554-91-6"	196100	245100	184000
Com_1629_pos	Harmine	去氢骆驼蓬碱	C13H12N2O	212.25	6.587	Alkaloids and derivatives	生物碱及其衍生物	"442-51-3"	195536	92610	93340
Com_776_pos	N', N''-Caffeoyl, feruloylputrescine	N', N''-咖啡酰、阿魏酰腐胺	C23H26N2O6	426.46	0.98	Amines	胺类		195000	397300	249500
Com_1294_pos	Isofraxetin	异秦皮素	C10H8O5	208.037	10.84	Coumarins and derivatives	香豆素及其衍生物	"50656-75-2"	194900	119400	67470
Com_159_neg	Kuwanon A	桑皮酮A	C25H24O6	420.454	0.7	Flavonoids	类黄酮	"62949-77-3"	194500	136900	92270
Com_1759_pos	Homoveratrumic acid	3,4-二甲氧基苯乙酸	C10H12O4	196.2	7.137	Benzoic acids and derivatives	苯甲酸及其衍生物	"93-40-3"	193100	69950	63610
Com_144_neg	Mevalonic acid	甲羟戊酸	C6H12O4	148.157	18.48	Fatty Acyls	脂肪酰类	"150-97-0"	192900	256900	226100
Com_1683_pos	Magnoflorine	木兰花碱	C20H24NO4+	342.409	5.904	Alkaloids and derivatives	生物碱及其衍生物	"2141-09-5"	192800	82470	76360
Com_84_neg	N-Acetyl-Dl-serine	N-乙酰-DL-丝氨酸	C5H9NO4	147.129	1.03	Amino Acid And Derivatives	氨基酸及其衍生物	"97-14-3"	191000	345200	336900
Com_1700_pos	1-Methyladenine	1-甲基腺嘌呤	C6H7N5	149.153	1.05	Purines and purine derivatives	嘌呤及其衍生物	"5142-22-3"	191000	20470000	19950000
Com_1239_pos	Maltotriitol	麦芽三糖醇	C18H34O16	506.453	1.07	Sugar Alcohols	糖醇	"32860-62-1"	190500	2142000	1891000
Com_1685_pos	Epigoitrin	(R,S)-告依春	C5H7NOS	129.18	4.958	Organoheterocyclic compounds	有机杂环化合物	"1072-93-1"	190214	95350	116700
Com_1287_pos	L-Homocitrulline	L-高瓜氨酸	C7H15N3O3	189.21	0.972	Amino Acid And Derivatives	氨基酸及其衍生物	"1190-49-4"	187900	381900	380600
Com_1119_pos	Phytocassane E	植保素E	C20H28O3	316.435	10.75	Terpene	萜烯	"181524-78-7"	187900	97680	62210
Com_36_neg	5-Phosphoribosyl 1-pyrophosphate	5-磷酸核糖基-1-焦磷酸	C5H13O14P3	196.25	1.01	Pentose phosphates	磷酸戊糖途径	"97-55-2"	187266	90250	72930
Com_139_neg	Lysope 14:0	溶血卵磷脂酰乙醇胺14:0	C19H40NO7P	425.5	11.27	Phospholipid	磷脂		187217	76230	69140
Com_867_pos	N-Acetyl-D-phenylalanine	N-乙酰-D-苯丙氨酸	C11H13NO3	207.226	4.1	Amino Acid And Derivatives	氨基酸及其衍生物	"10172-89-1"	187200	41790	44740
Com_1530_pos	DL-threitol	苏糖醇	C4H10O4	122.058	0.67	Sugar Alcohols	糖醇	"6968-16-7"	186300	133400	67680
Com_774_pos	Elemicin	榄香素	C12H16O3	208.25	10.99	Benzene and substituted derivatives	苯及其取代衍生物	"487-11-6"	185100	150900	122500
Com_587_neg	alpha-Ketoglutaric acid	α-酮戊二酸	C5H6O5	146.098	0.87	Tca Cycle	三羧酸循环	"328-50-7"	184900	195600	195500
Com_1495_pos	(+-)-Baclofen	(S)-4-氨基-3-(4-氯苯基)丁酸	C10H12ClNO2	213.661	9.22	Amino Acid And Derivatives	氨基酸及其衍生物	"66514-99-6"	183800	271200	239000
Com_1146_pos	N-Feruloylcadaverine	N-阿魏酰尸胺	C15H22N2O3	278.351	12.68	Phenolamides	酚胺		183600	1925000	1658000
Com_1335_pos	Cocamidopropyl betaine	椰油酰胺丙基甜菜碱	C19H38N2O3	342.1	9.91	Alkaloids and derivatives	生物碱及其衍生物	"86438-79-1"	182500	231500	229600
Com_348_neg	D-Histidine	D-组氨酸	C6H9N3O2	155.155	0.81	Amino Acid And Derivatives	氨基酸及其衍生物	"351-50-8"	182300	723600	729600
Com_1254_pos	Phellodensin F	黄体素F	C26H30O10	502.2	7.01	Flavanones	黄烷酮		182300	188300	176300
Com_1247_pos	Spermine	精胺	C10H26N4	202.34	0.71	Polyamine	多胺	"71-44-3"	181700	386800	463100
Com_1500_pos	Chrysoeriol 8-C-hexoside	金圣草黄素 8-C-己糖苷	C22H22O11	462.404	6.51	Flavonoids	类黄酮		181600	61830000	58410000
Com_1394_pos	C-hexosyl-apigenin O-feruloylhexoside	C-己糖基-芹菜素O-阿魏酰己糖苷	C37H38O18	770.69	7.16	Flavonoids	类黄酮		181192	116000	115200
Com_1668_pos	Quercetin O-malonylhexoside	槲皮素-O-丙二酰己糖苷	C24H22O15	550.43	7.6	Flavones and Flavonols	黄酮和黄酮醇		181000	45040	43240
Com_761_pos	L-Cysteine-glutathione gisulfide	L-半胱氨酸谷胱甘肽二硫化物	C13H22N4O8S2	426.466	0.96	Amino Acid And Derivatives	氨基酸及其衍生物	"13081-14-6"	180700	246300	259100
Com_208_neg	Adipic acid	己二酸	C6H10O4	146.058	0.86	Organic Acid And Its Derivatives	有机酸及其衍生物	"124-04-9"	180600	165800	176700
Com_770_pos	2,2'-Cyclouridine	2,2'-脱水尿苷	C9H10N2O5	226.186	1.01	Pyrimidines and pyrimidine derivatives	嘧啶及其衍生物	"3736-77-4"	179800	803600	662100
Com_548_neg	Vitamin C	抗坏血酸	C6H8O6	176.12	1.03	Vitamins	维生素	"50-81-7"	178900	278100	265900
Com_1388_pos	Kaempferol-dihexoside-rhamnoside	山奈酚-二己糖苷-鼠李糖苷	C33H40O20	756.669	6.08	Flavones and Flavonols	黄酮和黄酮醇		178600	968300	976200
Com_614_neg	L-Rhamnose	鼠李糖	C6H12O5	164.16	0.98	Carbohydrates And Its Derivatives	糖类及其衍生物	"73-34-7"	178200	295700	278800
Com_975_pos	1'-Hydroxymidazolam	1-羟基咪达唑仑	C18H13ClFN3O	341.772	5.9	Organoheterocyclic compounds	有机杂环化合物	"59468-90-5"	177800	38380	38770
Com_469_neg	Asiatic Acid	积雪草酸	C30H48O5	488.7	10.75	Terpenoids	萜类	"464-92-6"	177100	469700	496400
Com_11_neg	Coniferyl Alcohol	松柏醇	C10H12O3	180.2	7.05	Phenols And Its Derivatives	酚类及其衍生物	"458-35-5"	175498	67980	54270
Com_1325_pos	N-p-Coumaroylputrescine	N-p-香豆酰腐胺	C13H18N2O2	234.29	4.91	Cinnamic acids and derivatives	肉桂酸及其衍生物		174500	834900	777900
Com_1328_pos	MAG (18:3)	单酰甘油酯 (酰基 18:3)	C21H36O4	352.2	12.12	Glycerolipids	甘油酯		174500	563100	483800
Com_1093_pos	5-Aminoimidazole ribonucleotide	5-氨基咪唑核糖核苷酸	C8H14N3O7P	295.056	0.87	Nucleotide And Its Derivates	核苷酸及其衍生物	"25635-88-5"	174400	804700	763300
Com_1611_pos	All-trans-13,14-dihydroretinol	反式-13,14-二羟视黄醇	C20H30O	286.23	10.13	Vitamins	维生素	"115797-14-3"	173000	615500	449800
Com_1443_pos	Isoquinoline	异喹啉	C9H7N	129.1	4.87	Isoquinolines and derivatives	异喹啉及其衍生物	"119-65-3"	171700	447700	381400
Com_1647_pos	Methyl Nicotinate	烟酸甲酯	C7H7NO2	137.14	0.96	Pyridines and derivatives	吡啶及其衍生物	"93-60-7"	169500	132900	115100
Com_991_pos	Ergothioneine	麦角硫因	C9H15N3O2S	229.299	1.03	Amino Acid And Derivatives	氨基酸及其衍生物	"497-30-3"	169500	302500	260400
Com_475_neg	Plantamajoside	大车前苷	C29H36O16	640.587	6.35	Cinnamic acids and derivatives	肉桂酸及其衍生物	"104777-68-6"	168800	64450	46290
Com_1_neg	D-(+)-Cellobiose	D-纤维二糖	C12H22O11	342.3	0.91	Carbohydrates And Its Derivatives	糖类及其衍生物	"528-50-7"	167800	5881000	5106000
Com_923_pos	5-Methyluridine	5-甲基尿苷	C10H14N2O6	258.228	1.02	Nucleotide And Its Derivates	核苷酸及其衍生物	"1463-10-1"	167500	1224000	1316000
Com_1319_pos	Kukoamine A	地骨皮甲素	C28H42N4O6	530.31	0.68	Phenolamides	酚胺	"75288-96-9"	166100	61520	63700
Com_340_neg	D-Ribose 5-phosphate	D-核糖5磷酸	C5H11O8P	230.11	0.89	Pentose phosphates	磷酸戊糖途径	"3615-55-2"	165000	860000	954000
Com_38_neg	Liguiritigenin-7-O-D-apiosyl-4'-O-D-glucoside	甘草苷元-7-O-D-芹糖-4'-O-D-葡萄糖	C26H30O13	550.516	6.49	Flavonoids	类黄酮	"199796-12-8"	165000	38370	37270
Com_226_neg	Uridine 5'-Diphospho-N-Acetylgalactosamine	尿苷-5'-二磷酸-N-乙酰基氨基半乳糖	C17H27N3O17P2	607.354	1	Nucleotide And Its Derivates	核苷酸及其衍生物	"7277-98-7"	164000	223900	154900
Com_384_neg	3'-Hydroxyflavone	3-羟基黄酮	C15H10O3	238.24	10.049	Flavones and Flavonols	黄酮和黄酮醇	"577-85-5"	163300	163400	149600
Com_293_neg	Genistein	染料木素	C15H10O5	270.24	8.72	Isoflavonoids	异黄酮	"446-72-0"	162640	49750	51040
Com_781_pos	1,5-Diaminopentane	1,5-二氨基戊烷	C5H14N2	102.116	0.83	Amines	胺类	"462-94-2"	162600	112000	102900
Com_179_neg	8,15-DiHETE	8,15-白三烯B4	C20H32O4	336.1	6.8	Fatty Acyls	脂肪酰类	"80234-65-7"	161221	51760	49700
Com_1586_pos	3'-Aenylic Acid	腺苷-3'-磷酸	C10H14N5O7P	347.221	5.13	Nucleotide And Its Derivates	核苷酸及其衍生物	"84-21-9"	161010	173100	191400
Com_1089_pos	2-Linoleoylglycerol	2-亚油酰甘油酯	C21H38O4	354.277	0.69	Glycerolipids	甘油酯	"3443-82-1"	160500	101500	103600
Com_380_neg	Raffinose	棉籽糖	C18H32O16	504.437	1.009	Carbohydrates And Its Derivatives	糖类及其衍生物	"512-69-6"	160500	16500000	18270000
Com_826_pos	Adenosine 5'-Diphosphate	二磷酸腺苷	C10H15N5O10P2	427.201	1.05	Nucleotide And Its Derivates	核苷酸及其衍生物	"58-64-0"	158900	2033000	2095000
Com_653_neg	5,7,3'-trihydroxy-6,4',5'-trimethoxyflavone	5,7,3'-三羟基-6,4',5’-三甲氧基黄酮	C18H16O8	360.32	9.16	Flavonoids	类黄酮	"78417-26-2"	157700	979200	846200
Com_1172_pos	(S)-(+)-2-(anilinomethyl) pyrrolidine	(S)-(+)-2-(苯胺甲基)吡咯烷	C11H16N2	176.258	6.48	Amines	胺类	"64030-44-0"	157600	671900	670200
Com_1772_pos	Eriocitrin	圣草次甙	C27H32O15	596.534	6.43	Flavanones	黄烷酮	"13463-28-0"	156800	4470000	5788000
Com_1734_pos	Sepiapterin	墨喋呤	C9H11N5O3	237.215	4.33	Organoheterocyclic compounds	有机杂环化合物	"17094-01-8"	156400	59830	52260
Com_73_neg	Rosavin	络塞维	C20H28O10	428.43	6.92	Fatty Acyls	脂肪酰类	"84954-92-7"	156362	55950	53040
Com_1045_pos	O-methylChrysoeriol 8-C-hexoside	甲基金圣草黄素 8-C-己糖苷	C23H24O11	476.1	7.63	Flavonoids	类黄酮		155451	111600	115000
Com_580_neg	3-Aminosalicylic Acid	3-氨基水杨酸	C7H7NO3	153.135	4.57	Organic Acid And Its Derivatives	有机酸及其衍生物	"570-23-0"	155400	75190	78930
Com_1251_pos	Coumalic acid	香豆酸	C6H4O4	140.094	0.72	Organic Acid And Its Derivatives	有机酸及其衍生物	"500-05-0"	155200	103800	94460
Com_585_neg	Cinene	柠檬烯	C10H16	136.23	18.26	Terpenoids	萜类	"138-86-3"	155100	335300	192700
Com_1279_pos	7-Methoxy-4-methylcoumarin	7-甲氧基-4-甲基香豆素	C11H10O3	190.2	7.79	Coumarins and derivatives	香豆素及其衍生物	"2555-28-4"	154200	576000	541500
Com_985_pos	Dihydrozeatin	二氢玉米素	C10H15N5O	221.259	4.673	Phytohormones	植物激素	"23599-75-9"	153943	126800	124200
Com_578_neg	Lysopa 16:0	溶血卵磷脂酸16:0	C19H39O7P	410.48	12.54	Phospholipid	磷脂		153688	47690	50070
Com_486_neg	Myristic acid	肉豆蔻酸	C14H28O2	228.371	6.1	Fatty Acyls	脂肪酰类	"544-63-8"	153500	33910	35210
Com_1033_pos	C-hexosyl-luteolin O-hexosyl-O-pentoside	C-己糖基-木犀草素 O-己糖基戊糖苷	C32H38O20	742.1	0.72	Flavonoids	类黄酮		152500	89670	112600
Com_43_neg	Ciso-Cistanoside C	异肉苁蓉苷	C30H38O15	638.622	6.26	Fatty Acyls	脂肪酰类		152200	59620	56800
Com_1427_pos	Linoleic acid	亚油酸	C18H32O2	280.445	14.46	Fatty Acyls	脂肪酰类	"60-33-3"	151870	72030	65150
Com_1656_pos	3-Hydroxy-9,10-Dimethoxypterocarpan	(6aR,11aR)-3-羟基-9,10-二甲氧基紫檀烷	C17H16O5	300.311	7.16	Isoflavonoids	异黄酮	"73340-41-7"	151800	60510	52190
Com_1581_pos	C-hexosyl-apigenin O-hexosyl-O-pentoside	C-己糖基-芹菜素 O-己糖戊糖苷	C32H38O19	726.642	0.65	Flavonoids	类黄酮		151100	70340	70720
Com_1528_pos	Guanosine monophosphate	鸟苷单磷酸	C10H14N5O8P	363.058	1.01	Nucleotide And Its Derivates	核苷酸及其衍生物		150400	4667000	4313000
Com_1314_pos	Geranylgeraniol	香叶基香叶醇	C20H34O	290.483	5.47	Terpenoids	萜类	"24034-73-9"	149500	371200	336600
Com_571_neg	D-Ribulose 1,5-bisphosphate	1,5-二磷酸-D-核酮糖	C5H12O11P2	310.09	10.95	Carbohydrates And Its Derivatives	糖类及其衍生物	"14689-84-0"	148000	81520	69500
Com_290_neg	Resveratrol	白藜芦醇	C14H12O3	228.24	7.64	Polyphenol	多酚	"501-36-0"	147995	61700	54470
Com_964_pos	Agmatine	胍丁胺	C5H14N4	130.1	0.92	Amines	胺类	"306-60-5"	147600	181200	129400
Com_1729_pos	S-Sulfo-L-cysteine	S-磺基-L-半胱氨酸	C3H7NO5S2	201.221	0.98	Amino Acid And Derivatives	氨基酸及其衍生物	"1637-71-4"	147300	101400	109100
Com_1390_pos	C-hexosyl-luteolin O-hexoside	C-己糖基-木犀草素O-己糖苷	C27H30O16	610.518	5.68	Flavonoids	类黄酮		147000	1908000	1943000
Com_924_pos	Guanosine 3',5'-Cyclic Monophosphate	鸟苷3',5'-环一磷酸	C10H12N5O7P	345.205	0.71	Nucleotide And Its Derivates	核苷酸及其衍生物	"7665-99-8"	146400	87700	91100
Com_1057_pos	O-Feruloyl 4-hydroxylcoumarin	阿魏酸 4-羟基香豆素	C19H14O6	338.1	17.01	Cinnamic acids and derivatives	肉桂酸及其衍生物		146100	203700	161200
Com_662_neg	D-Erythrose 4-phosphate	D-赤藓糖-4-磷酸	C4H9O7P	200.084	1.08	Carbohydrates And Its Derivatives	糖类及其衍生物	"585-18-2"	144000	449700	407700
Com_595_neg	Idaein chloride	矢车菊素-3-半乳糖苷	C21H21ClO11	484.84	5.213	Anthocyanins	花青素	"27661-36-5"	143800	81850	72070
Com_663_neg	D-Fructose 1,6-bisphosphate	D-果糖-1,6-二磷酸	C6H14O12P2	340.116	0.88	Sugar Acids And Its Derivatives	糖酸及其衍生物	"488-69-7"	142200	1024000	1153000
Com_1688_pos	D-beta-Homophenylalanine	D-β-高苯丙氨酸	C10H13NO2	179.216	5.41	Amino Acid And Derivatives	氨基酸及其衍生物	"131270-08-1"	141200	222700	217400
Com_419_neg	Trilobatin	三叶苷	C21H24O10	436.409	7.523	Chalcones and dihydrochalcones	查尔酮和二氢查尔酮	"4192-90-9"	140500	48090	33710
Com_216_neg	Salvianolic acid D	丹酚酸D	C20H18O10	418.351	6.865	Phenolic acids	酚酸类	"142998-47-8"	140100	46770	64680
Com_1111_pos	3-Methylcrotonylglycine	N-(3-甲基-1-氧代-2-丁烯酸)氨基乙酸	C7H11NO3	157.167	1.08	Organic Acid And Its Derivatives	有机酸及其衍生物	"33008-07-0"	140000	130900	195400
Com_304_neg	Homogentisic Acid	尿黑酸	C8H8O4	168.15	4.059	Organic Acid And Its Derivatives	有机酸及其衍生物	"451-13-8"	140000	388400	375100
Com_1780_pos	Sinensetin	甜橙素	C20H20O7	372.37	9.55	Flavones and Flavonols	黄酮和黄酮醇	"2306-27-6"	139300	333600000	323600000
Com_368_neg	Quercetin	槲皮素	C15H10O7	302.236	8.96	Flavones and Flavonols	黄酮和黄酮醇	"117-39-5"	139000	478200	484400
Com_689_neg	Laricitrin	3'-氧甲基杨梅素	C16H12O8	332.262	2.6	Flavones and Flavonols	黄酮和黄酮醇	"53472-37-0"	137800	253700	273400
Com_1338_pos	Gramine	芦竹碱	C11H14N2	174.24	9.938	Alkaloids and derivatives	生物碱及其衍生物	"87-52-5"	137800	263600	198000
Com_57_neg	Cyanidin O-syringic acid	矢车菊素 O-丁香酸	C24H18O10	466.1	5.28	Anthocyanins	花青素		137100	48920	63100
Com_535_neg	GMP	一磷酸鸟苷	C10H14N5O8P	363.221	0.94	Nucleotide And Its Derivates	核苷酸及其衍生物	"85-32-5"	136600	310800	339700
Com_743_neg	Ethyl caffeate	咖啡酸乙酯	C11H12O4	208.211	8.507	Cinnamic acids and derivatives	肉桂酸及其衍生物	"102-37-4"	136200	223000	214800
Com_80_neg	Calycosin	毛异黄酮	C16H12O5	284.263	8.18	Isoflavonoids	异黄酮	"20575-57-9"	136000	18520	28600
Com_657_neg	2-O-cinnamoyl-1-O-galloyl-beta-D-glucose	2-O-1-肉桂酰基-1-O--没食子酸β-D-葡萄糖苷	C22H22O11	462.41	7.41	Glycosides	糖苷类	"791836-69-6"	135576	40310	37100
Com_1003_pos	Tropinone	托品酮	C8H13NO	139.19	1	Alkaloids and derivatives	生物碱及其衍生物	"532-24-1"	135300	61900	52940
Com_294_neg	Arbutin	熊果苷	C12H16O7	272.25	2.32	Carbohydrates And Its Derivatives	糖类及其衍生物	"497-76-7"	134700	214500	207300
Com_696_neg	(+)-Dipentene	(+)-柠檬烯	C10H16	136.234	18.28	Terpenoids	萜类	"5989-27-5"	134100	125000	150500
Com_1213_pos	Dicoumarol	双羟香豆素	C19H12O6	336.29	13.06	Coumarins and derivatives	香豆素及其衍生物	"66-76-2"	132911	70910	80950
Com_506_neg	Coniferylaldehyde	松柏醛	C10H10O3	178.063	7.29	Phenols And Its Derivatives	酚类及其衍生物	"20649-42-7"	132400	924600	884800
Com_1474_pos	5-Aminolevulinic acid	5-氨基乙酰丙酸	C5H9NO3	131.13	0.872	Carbohydrates And Its Derivatives	糖类及其衍生物	"106-60-5"	132000	266400	288500
Com_928_pos	N-gamma-Acetyl-N-2-Formyl-5-Methoxykynurenamine	N-γ-乙酰基-N-2-甲酰基-5-甲基犬尿氨酸	C13H16N2O4	264.277	4.48	Ketones	酮类	"52450-38-1"	131535	145800	110700
Com_1110_pos	3-Carbamyl-1-Methylpyridinium Chloride	3-氨基甲酰-1-甲基氯化吡啶	C7H9ClN2O	172.612	0.98	Pyridines and derivatives	吡啶及其衍生物	"1005-24-9"	131400	292300	324900
Com_288_neg	23-Hydroxybetulinic acid	23-羟基白桦酸	C30H48O4	472.7	12.44	Terpenoids	萜类	"85999-40-2"	131128	64220	49800
Com_16_neg	Trehalose 6-phosphate	海藻糖-6-磷酸	C12H23O14P	422.276	0.96	Carbohydrates And Its Derivatives	糖类及其衍生物	"4484-88-2"	131100	20390000	23730000
Com_1699_pos	1,N6-Etheno-2-Deoxy-Adenosine	N6-亚乙烯基-2'-脱氧腺苷	C12H13N5O3	275.263	6.79	Purines and purine derivatives	嘌呤及其衍生物	"68498-25-9"	130900	182100	183700
Com_531_neg	Pinocembrin	乔松素	C15H12O4	256.25	10.372	Flavanones	黄烷酮	"480-39-7"	130500	89170	82540
Com_141_neg	Lysope 18:0	溶血卵磷脂酰乙醇胺18:0	C23H48NO7P	479.588	13.73	Phospholipid	磷脂		130334	35460	32410
Com_1028_pos	Syringetin 3-O-hexoside	丁香亭 3-O-己糖苷	C23H24O13	508.1	0.98	Flavonoids	类黄酮		130000	890100	1735000
Com_354_neg	D-Lactic acid	D-羟基丙酸	C3H6O3	90.08	1.44	Organic Acid And Its Derivatives	有机酸及其衍生物	"10326-41-7"	129700	124600	131300
Com_1529_pos	Lactucin	莴苣苦素	C15H16O5	276.1	0.67	Lactones	内酯	"1891-29-8"	129300	574600	431100
Com_868_pos	4',5,6,7-Tetramethoxyflavone	5,6,7,4'-四甲氧基黄酮	C19H18O6	342.11	9.87	Flavonoids	类黄酮	"1168-42-9"	129200	306900000	305100000
Com_1768_pos	Isosinensetin	异橙黄酮	C20H20O7	372.375	9.37	Flavones and Flavonols	黄酮和黄酮醇	"17290-70-9"	128700	259800000	258600000
Com_1775_pos	Przewaquinone A	紫丹参甲素	C19H18O4	310.344	11.752	Quinones	醌类	"76843-23-7"	127959	149700	103600
Com_522_neg	Glycitin	黄豆黄苷	C22H22O10	446.41	6.324	Isoflavonoids	异黄酮	"40246-10-4"	127644	74870	57190
Com_132_neg	Mogroside ⅡA2	罗汉果皂苷IIA2	C42H72O14	801.025	7.5	Steroids and steroid derivatives	类固醇及其衍生物	"88901-45-5"	127500	19110	27120
Com_69_neg	Taxifolin O-glucoside	橙皮苷O-葡萄糖苷	C21H22O12	466.392	5.31	Flavanones	黄烷酮		127200	47560	76000
Com_493_neg	Isohemiphloin	异柚葡糖苷	C21H22O10	434.121	6.39	Flavanones	黄烷酮	"3682-02-8"	127100	1272000	1412000
Com_588_neg	3-Methyl-2-Oxobutanoic Acid	2-氧代-3-甲基-丁酸	C5H8O3	116.115	1.05	Organic Acid And Its Derivatives	有机酸及其衍生物	"759-05-7"	126607	61880	68890
Com_1336_pos	Colchicine	秋水仙碱	C22H25NO6	399.44	7.965	Alkaloids and derivatives	生物碱及其衍生物	"64-86-8"	126300	41620	55200
Com_317_neg	2',5'-Dihydroxyacetophenone	2,5-二羟基苯乙酮	C8H8O3	152.147	7.16	Ketones	酮类	"490-78-8"	125910	35700	46120
Com_1615_pos	Atractylenolide I	白术内酯I	C15H18O2	230.3	13.035	Terpenoids	萜类	"73069-13-3"	125900	96500	90050
Com_60_neg	Gibberellin A1	赤霉素A1	C19H24O6	348.39	6.819	Phytohormones	植物激素	"545-97-1"	124689	29820	64200
Com_397_neg	Hexadecanedioic acid	十六碳二酸	C16H30O4	286.41	11.908	Fatty Acyls	脂肪酰类	"505-54-4"	124500	199300	189200
Com_1431_pos	Yamogenin	雅姆皂苷元	C27H42O3	414.621	0.9	Steroids and steroid derivatives	类固醇及其衍生物	"512-06-1"	124400	305800	326100
Com_1128_pos	5-O-p-Coumaroyl shikimic acid	5-O-对香豆酰莽草酸	C16H16O7	320.1	1	Cinnamic acids and derivatives	肉桂酸及其衍生物		124300	113500	153300
Com_225_neg	Arachidonic acid	花生四烯酸	C20H32O2	304.47	6.881	Fatty Acyls	脂肪酰类	"506-32-1"	122700	157200	156900
Com_1742_pos	Oroxin B	木蝴蝶苷B	C27H30O15	594.518	6.982	Flavonoids	类黄酮	"114482-86-9"	122500	328000	449700
Com_371_neg	Lobetyolin	党参炔苷	C20H28O8	396.431	6.9	Carbohydrates And Its Derivatives	糖类及其衍生物	"136085-37-5"	121900	72440	79200
Com_699_neg	Catalpol	梓醇	C15H22O10	362.333	4.55	Terpenoids	萜类	"2415-24-9"	121600	115000	68100
Com_529_neg	Benzoic Acid	苯甲酸	C7H6O2	122.12	7.497	Benzoic acids and derivatives	苯甲酸及其衍生物	"65-85-0"	121500	1214000	993800
Com_981_pos	MAG (18:2)	单酰甘油酯 (酰基 18:2)	C21H38O4	354.1	14.64	Glycerolipids	甘油酯		119805	126900	101900
Com_83_neg	Butein	2',3,4,4'-四羟基查尔酮	C15H12O5	272.069	0.95	Chalcones and dihydrochalcones	查尔酮和二氢查尔酮	"487-52-5"	118700	45860	60990
Com_1655_pos	1,2,3,6,7-Pentamethoxyxanthone	1,2,3,6,7-五甲氧基口山酮	C18H18O7	346.337	7.7	Benzene and substituted derivatives	苯及其取代衍生物		118600	8403000	7313000
Com_516_neg	3-(2-Naphthyl)-L-alanine	3-(2-萘基)-L-丙氨酸	C13H13NO2	215.095	6.07	Amino Acid And Derivatives	氨基酸及其衍生物	"58438-03-2"	118200	71270	78120
Com_258_neg	deoxyribose-phosphate	脱氧核糖-磷酸	C5H7O8P	226.08	0.97	Nucleotide And Its Derivates	核苷酸及其衍生物		117800	370300	475500
Com_212_neg	Sorbitol 6-phosphate	山梨糖醇-6-磷酸	C6H15O9P	262.045	0.86	Carbohydrates And Its Derivatives	糖类及其衍生物	"20479-58-7"	117700	505700	569700
Com_1616_pos	2-Methoxybenzoic acid	茴香酸	C8H8O3	152.15	7.168	Organic Acid And Its Derivatives	有机酸及其衍生物	"579-75-9"	117600	127500	109000
Com_1485_pos	Efetaal	2-(1-乙氧代乙氧代)乙基苯	C12H18O2	194.27	9.086	Benzene and substituted derivatives	苯及其取代衍生物	"2556-10-7"	117600	105000	83910
Com_1635_pos	Aristolochic acids	马兜铃酸Ⅰ	C17H11NO7	341.277	6.64	Organic Acid And Its Derivatives	有机酸及其衍生物	"313-67-7"	117200	57110	43760
Com_1491_pos	Phylloquinone	维生素K1	C31H46O2	450.696	8.18	Vitamins	维生素	"84-80-0"	116771	86740	98540
Com_124_neg	Hydroxytyrosol	羟基酪醇	C8H10O3	154.16	4.731	Phenols And Its Derivatives	酚类及其衍生物	"10597-60-1"	116700	23420	24900
Com_591_neg	Taxifolin	二氢槲皮素	C15H12O7	304.25	6.885	Flavonoids	类黄酮	"480-18-2"	116300	77310	76380
Com_1707_pos	Reserpine	利血平	C33H40N2O9	608.689	8.12	Alkaloids and derivatives	生物碱及其衍生物	"50-55-5"	115800	19210	37220
Com_1226_pos	2-Amino-4-(methylthio)butyric acid	DL-蛋氨酸	C5H11NO2S	149.211	1.46	Amino Acid And Derivatives	氨基酸及其衍生物	"59-51-8"	115100	5462000	8855000
Com_1753_pos	(S)-Zearalanone	玉米赤霉酮	C18H24O5	320.38	12.17	Phenylpropanoids and polyketides	苯丙素和聚酮化合物	"5975-78-0"	114558	69880	78700
Com_1666_pos	Roseoside	长寿花糖甙	C19H30O8	386.437	1.09	Fatty Acyls	脂肪酰类	"54835-70-0"	113900	830500	823600
Com_1444_pos	D-Threose	D-苏糖	C4H8O4	120.042	1.66	Carbohydrates And Its Derivatives	糖类及其衍生物		113900	118400	90900
Com_1428_pos	Viscumamide	槲寄生酰胺	C30H55N5O5	565.79	6.83	Amino Acid And Derivatives	氨基酸及其衍生物		112800	47640	71250
Com_353_neg	Dihydroxyacetone phosphate	磷酸二羟基丙酮	C3H7O6P	170.058	0.9	Carbohydrates And Its Derivatives	糖类及其衍生物	"57-04-5"	112600	52670	60410
Com_1166_pos	Citroside A	柑橘苷 A	C19H30O8	386.194	6.04	Terpenoids	萜类	"120330-44-1"	112500	78090	122600
Com_944_pos	Isosakuranetin	异樱花素	C16H14O5	286.279	10.315	Flavanones	黄烷酮	"480-43-3"	111000	35800	35040
Com_633_neg	Liquiritin apioside	芹糖甘草苷	C26H30O13	550.516	6.5	Flavonoids	类黄酮	"74639-14-8"	110800	38890	19580
Com_1026_pos	5-Ethyl-2'-deoxyuridine	乙去氧尿啶	C11H16N2O5	256.255	8.72	Nucleotide And Its Derivates	核苷酸及其衍生物	"15176-29-1"	110300	55140	41450
Com_1692_pos	Dehydroevodiamine	去氢吴茱萸碱	C19H15N3O	301.34	7.31	Alkaloids and derivatives	生物碱及其衍生物	"67909-49-3"	109471	69700	87180
Com_629_neg	Genipin	京尼平	C11H14O5	226.23	6.653	Terpenoids	萜类	"6902-77-8"	109400	37100	25050
Com_367_neg	3-Hydroxy-3-methyl butyric acid	β-羟基异戊酸	C5H10O3	118.063	0.97	Organic Acid And Its Derivatives	有机酸及其衍生物	"625-08-1"	108900	137200	142800
Com_198_neg	Indole-2-carboxylic acid	2-吲哚羧酸	C9H7NO2	161.16	0.927	Indoles and derivatives	吲哚及其衍生物	"1477-50-5"	108100	217000	189700
Com_519_neg	1-O-Galloyl-D-glucose	1-O-没食子酰-D-葡萄糖	C13H16O10	332.074	4.68	Tannins	鞣质	"58511-73-2"	106500	177700	216800
Com_55_neg	Apigenin O-hexosyl-O-pentoside	芹菜素 O-己糖基-O-戊糖苷	C26H28O14	564.1	6.83	Flavonoids	类黄酮		106500	1192000	1211000
Com_309_neg	Peonidin chloride	芍药花青素	C16H13ClO6	336.72	11.419	Anthocyanins	花青素	"134-01-0"	106300	95820	98740
Com_35_neg	N-Acetylglucosamine 1-phosphate	N-乙酰葡萄糖胺 1-磷酸	C8H16NO9P	301.1	0.91	Carbohydrates And Its Derivatives	糖类及其衍生物	"6866-69-9"	105900	414800	379700
Com_722_neg	4'-Hydroxypropiophenone	4-羟基苯丙酮	C9H10O2	150.175	7.9	Ketones	酮类	"70-70-2"	105800	71960	67630
Com_374_neg	Apigenin 7-O-glucoside	芹菜素 7-O-葡萄糖苷	C21H20O10	432.38	7.87	Flavones and Flavonols	黄酮和黄酮醇	"578-74-5"	105664	37350	48350
Com_906_pos	Chrysin 7-O-beta-gentiobioside	白杨素-7-O-β-龙胆二糖苷	C27H30O14	578.526	7.48	Flavones and Flavonols	黄酮和黄酮醇	"88640-89-5"	105651	103000	109900
Com_93_neg	Salicin	D-(-)-水杨苷	C13H18O7	286.28	4.989	Carbohydrates And Its Derivatives	糖类及其衍生物	"138-52-3"	105200	35610	45760
Com_3_neg	Bergaptol	香柑醇	C11H6O4	202.163	8.237	Coumarins and derivatives	香豆素及其衍生物	"486-60-2"	104900	67900000	66340000
Com_279_neg	alpha-Zearalanol	玉米赤霉醇	C18H26O5	322.396	7.3	Phenylpropanoids and polyketides	苯丙素和聚酮化合物	"26538-44-3"	104700	31040	36960
Com_622_neg	4-Methoxycinnamic acid	4-甲氧基肉桂酸	C10H10O3	178	8.56	Cinnamic acids and derivatives	肉桂酸及其衍生物	"830-09-1"	104000	94260	81890
Com_507_neg	Kynurenic acid O-hexside	犬尿酸 O-己糖苷	C16H17NO8	351.1	3.82	Quinolines and derivatives	喹啉及其衍生物		103400	152600	144300
Com_156_neg	4-Hydroxyquinazoline	4-羟基喹唑啉	C8H6N2O	146.146	5.54	Organoheterocyclic compounds	有机杂环化合物	"491-36-1"	103000	1045000	1117000
Com_733_neg	Methyl 4-hydroxybenzoate	尼泊金甲酯	C8H8O3	152.15	8.26	Benzoic acids and derivatives	苯甲酸及其衍生物	"99-76-3"	102512	55360	25350
Com_1237_pos	Methyl jasmonate	甲基茉莉酮酸酯	C13H20O3	224.296	10.984	Phytohormones	植物激素	"39924-52-2"	101800	89290	95040
Com_1644_pos	Sclareol Glycol	香紫苏二醇	C16H30O2	254.413	7.54	Alcohols and polyols	醇类和多元醇类	"55881-96-4"	101300	62730	51450
Com_181_neg	13-HpOTrE(r)	13-氢过氧基-十八碳三烯酸	C18H30O4	310	10.93	Fatty Acyls	脂肪酰类	"121107-97-9"	101265	58090	67220
Com_1589_pos	2'-Deoxyguanosine-5'-monophosphate	2-脱氧鸟苷-5-单磷酸	C10H14N5O7P	347.221	1.66	Nucleotide And Its Derivates	核苷酸及其衍生物	"312693-67-7"	101218	51630	59030
Com_1174_pos	Chrysoeriol O-hexosyl-O-pentoside	金圣草黄素 O-己糖基-O-戊糖苷	C27H30O15	594.526	7.1	Flavonoids	类黄酮		101200	181800	226000
Com_579_neg	2-Isopropylmalic acid	2-异丙基苹果酸	C7H12O5	176.167	6.13	Organic Acid And Its Derivatives	有机酸及其衍生物	"3237-44-3"	101100	31720	32540
Com_933_pos	N-Acetyl-5-hydroxytryptamine	N-乙酰基-5-羟色胺	C12H14N2O2	218.252	5.98	Amino Acid And Derivatives	氨基酸及其衍生物	"1210-83-9"	100800	60470	46320
Com_1354_pos	Angelol A	当归醇A	C20H24O7	376.406	11.11	Coumarins and derivatives	香豆素及其衍生物	"19625-17-3"	100700	104600	56330
Com_1261_pos	Pterosin B	蕨素B	C14H18O2	218.296	5.68	Terpenoids	萜类	"34175-96-7"	100300	41480	30320
Com_1410_pos	Glu-Glu	谷氨酸-谷氨酸肽	C10H14N2O7	276.243	0.99	Amino Acid And Derivatives	氨基酸及其衍生物	"3929-61-1"	100174	85680	100500
Com_1105_pos	O-Feruloyl coumarin	阿魏酰香豆素	C19H14O5	322.317	5.6	Cinnamic acids and derivatives	肉桂酸及其衍生物		100100	1799000	1638000
Com_1438_pos	(-)-Menthone	L-薄荷酮	C10H18O	154.249	7	Terpenoids	萜类	"14073-97-3"	100100	477800	460600
Com_643_neg	Scutellarein	野黄芩素	C15H10O6	286.236	7.635	Flavones and Flavonols	黄酮和黄酮醇	"529-53-3"	99852	32350	47740
Com_1054_pos	6-Formyl-isoophiopogonanone A	6-醛基异麦冬黄烷酮A	C19H16O7	356.332	10.52	Flavonoids	类黄酮	"116291-82-8"	99307	42700	40450
Com_802_pos	Isofraxidin	异嗪皮啶	C11H10O5	222.194	7.081	Phenylpropanoids	苯丙素类	"486-21-5"	98210	42400	63190
Com_150_neg	GIBBERELLIN A15	赤霉素15	C20H26O4	330.183	9.18	Phytohormones	植物激素	"13744-18-8"	96780	72510	75390
Com_919_pos	4'-Methoxychalcone	4'-甲氧基查耳酮	C16H14O2	238.28	11.961	Chalcones and dihydrochalcones	查尔酮和二氢查尔酮	"959-23-9"	96214	54390	96660
Com_298_neg	Pinoresinol Diglucoside	松脂醇二氢葡萄糖苷	C32H42O16	682.675	7.15	Lignans	木脂素类	"63902-38-5"	95500	17900	14070
Com_942_pos	Raspberry Ketone	覆盆子酮	C10H12O2	164.2	7.502	Phenols And Its Derivatives	酚类及其衍生物	"5471-51-2"	94470	83460	82210
Com_42_neg	PicrosideⅠ	胡黄连苷Ⅰ	C24H28O11	492.479	7.31	Phenylpropanoids and polyketides	苯丙素和聚酮化合物	"27409-30-9"	94048	34960	38610
Com_1679_pos	methylChrysoeriol C-hexoside	甲基菊醇-C-己糖甘	C23H24O11	476.43	7.3	Flavonoids	类黄酮		93916	54830	94470
Com_1000_pos	Hydroquinidine	氢化奎尼定	C20H26N2O2	326.43	6.14	Alkaloids and derivatives	生物碱及其衍生物	"1435-55-8"	93700	91160	75260
Com_713_neg	Antiarol	3,4,5-三甲氧基苯酚	C9H12O4	184.19	6.88	Phenols And Its Derivatives	酚类及其衍生物	"642-71-7"	93585	34790	20770
Com_959_pos	alpha-Asarone	α-细辛脑 2	C12H16O3	208.25	11.208	Benzene and substituted derivatives	苯及其取代衍生物	"2883-98-9"	93220	42260	28950
Com_1484_pos	7-Hydroxy-4-methyl-8-nitrocoumarin	7-羟基-4-甲基-8-硝基香豆素	C10H7NO5	221.166	9.743	Coumarins and derivatives	香豆素及其衍生物	"19037-69-5"	92480	78190	71190
Com_951_pos	9,17-Octadecadiene-12,14-diyne-1,11,16-triol	9,17-十八二烯-12,14-二炔-1,11,16-三醇	C18H26O3	290.397	13.78	Fatty Acyls	脂肪酰类	"211238-60-7"	91540	24100	30200
Com_116_neg	Delphinidin chloride	花翠素	C15H11ClO7	338.7	5.602	Anthocyanins	花青素	"528-53-0"	91500	15630	32680
Com_185_neg	p-Coumaric acid ethyl ester	对香豆酸乙酯	C11H12O3	192.21	9.387	Cinnamic acids and derivatives	肉桂酸及其衍生物	"7362-39-2"	91084	41220	28320
Com_603_neg	Lauric Acid	月桂酸	C12H24O2	200.32	7.28	Fatty Acyls	脂肪酰类	"143-07-7"	90860	104700	135200
Com_1543_pos	Docosanoic acid	山嵛酸	C22H44O2	340.584	1.08	Fatty Acyls	脂肪酰类	"112-85-6"	90650	121400	167100
Com_1550_pos	Alizarin	1,2-二羟基蒽醌	C14H8O4	240.21	9.849	Organic Acid And Its Derivatives	有机酸及其衍生物	"72-48-0"	90370	40840	34070
Com_1623_pos	gamma-Dodecalactone	γ-十二内酯	C12H22O2	198.302	4.5	Lactones	内酯	"57084-18-1"	90200	20520	29630
Com_780_pos	Malvidin 3-O-galactoside	锦葵色素-3-O-半乳糖苷	C23H25O12	493	7.63	Anthocyanins	花青素		89980	1397000	1451000
Com_146_neg	N-Acetyl-Asp-Glu	N-乙酰-天冬氨酸-谷氨酸	C11H16N2O8	304.253	2.02	Amino Acid And Derivatives	氨基酸及其衍生物	"3106-85-2"	89470	58230	70930
Com_1199_pos	LysoPC 18:3 (2n isomer)	溶血磷脂酰胆碱 18:3(2n异构)	C26H48NO7P	517.2	11.33	Phospholipid	磷脂		89400	2949000	2516000
Com_286_neg	Hastatoside	5-羟基马鞭草苷	C17H24O11	404.366	5.74	Terpenoids	萜类	"50816-24-5"	89360	98920	123100
Com_955_pos	Oleic Acid	油酸	C18H34O2	282.46	11.53	Fatty Acyls	脂肪酰类	"112-80-1"	88965	55140	42890
Com_1731_pos	methylApigenin C-hexoside	甲基芹菜素-C-己糖苷	C22H22O10	446.404	0.73	Flavonoids	类黄酮		88910	70880	83000
Com_1552_pos	Synephrine	辛弗林	C9H13NO2	167.21	1.039	Phenols And Its Derivatives	酚类及其衍生物	"94-07-5"	88230	18310000	18670000
Com_1471_pos	Tryptamine	色胺	C10H12N2	160.22	5.205	Indoles and derivatives	吲哚及其衍生物	"61-54-1"	88163	53700	44550
Com_1053_pos	7-O-Methylaloeresin A	7-O-甲基芦荟新苷A	C29H30O11	554.55	7.47	Glycosides	糖苷类	"329361-25-3"	87965	57610	55860
Com_1168_pos	Calystegine A3	打碗花精 A3	C7H13NO3	159.09	0.73	Alkaloids and derivatives	生物碱及其衍生物	"131580-36-4"	87930	14200000	15270000
Com_149_neg	2-(Formylamino)benzoic acid	2-甲酰胺基苯甲酸	C8H7NO3	165.043	5.47	Benzoic acids and derivatives	苯甲酸及其衍生物	"3342-77-6"	87770	165200	170300
Com_737_neg	1-Hydroxypinoresinol-1-O-Glucoside	1-羟基松脂醇-1-O-葡萄糖苷	C26H32O12	536.189	6.62	Lignans	木脂素类	"81495-71-8"	87160	39320	54640
Com_335_neg	Thymidine 5'-diphosphate	胸苷-5’-二磷酸	C10H16N2O11P2	402.19	0.69	Nucleotide And Its Derivates	核苷酸及其衍生物		87150	67120	63620
Com_1189_pos	3’,4’,5’-Tricetin 5-O-hexoside	3’,4’,5’-麦黄酮5-O-己糖苷	C24H26O12	506.46	6.62	Flavonoids	类黄酮		86620	14380000	14460000
Com_561_neg	Ophiopogonanone E	麦冬黄烷酮 E	C19H20O7	360.363	10.69	Flavonoids	类黄酮	"588706-66-5"	86592	88920	90640
Com_180_neg	Madecassic acid	羟基积雪草酸	C6H12O5	164.156	0.99	Terpenoids	萜类	"18449-41-7"	86380	176900	149300
Com_1362_pos	Ethyl Coumarin-3-carboxylate	香豆素-3-羧酸乙酯	C12H10O4	218.205	9.29	Coumarins and derivatives	香豆素及其衍生物	"1846-76-0"	85890	87200	77100
Com_1536_pos	Methyl cinnamate	肉硅酸甲酯	C10H10O2	162.19	10.606	Cinnamic acids and derivatives	肉桂酸及其衍生物	"103-26-4"	85670	294100000	285700000
Com_524_neg	Genistin	染料木苷	C21H20O10	432.38	6.78	Isoflavonoids	异黄酮	"529-59-9"	85390	414400	513700
Com_1579_pos	Tomatidenol	番茄烯胺	C27H43NO2	413.636	12.27	Steroids and steroid derivatives	类固醇及其衍生物	"546-40-7"	84760	133800	91640
Com_147_neg	Angelol B	当归醇B	C20H24O7	376.4	0.98	Coumarins and derivatives	香豆素及其衍生物	"83156-04-1"	84750	91240	80620
Com_617_neg	5-Phenyl-2,4-pentadienoic acid	5-苯基戊烷-2,4-双酸	C11H10O2	174.2	10.04	Benzene and substituted derivatives	苯及其取代衍生物	"1552-94-9"	84684	25410	28310
Com_1404_pos	Thymol	麝香草酚	C10H14O	150.22	11.17	Terpenoids	萜类	"89-83-8"	84380	58810	34050
Com_1106_pos	N'-p-coumaroylspermine	N'-对香豆酰精胺	C19H32N4O2	348.48	5.38	Cinnamic acids and derivatives	肉桂酸及其衍生物		84330	74260	70900
Com_1291_pos	Anise oil	反式茴香脑	C14H18O3	234.291	15.13	Benzene and substituted derivatives	苯及其取代衍生物	"8007-70-3"	83773	47250	36070
Com_62_neg	Aminophylline	氨茶碱	C16H24N10O4	420.43	5.013	Purines and purine derivatives	嘌呤及其衍生物	"317-34-0"	83347	37450	53350
Com_1100_pos	Diethanolamine	二乙醇胺	C4H11NO2	105.136	0.84	Amines	胺类	"111-42-2"	83110	124100	110800
Com_1621_pos	Ganoderiol A	灵芝醇A	C30H46O2	438.685	5.8	Terpenoids	萜类	"104700-97-2"	83000	115500	103500
Com_1430_pos	Xanthurenic acid O-hexoside	黄嘌呤酸邻己糖苷	C16H17NO9	367.31	4.52	Nucleotide And Its Derivates	核苷酸及其衍生物		82420	12310000	11700000
Com_1487_pos	P-Aminohippuric Acid	p-氨基马尿酸	C9H10N2O3	194.187	11.64	Organic Acid And Its Derivatives	有机酸及其衍生物	"61-78-9"	82077	104200	66420
Com_451_neg	Sodium Valproate	丙戊酸钠	C8H15NaO2	166.097	5.01	Fatty Acyls	脂肪酰类	"1069-66-5"	81460	156700	164800
Com_813_pos	Resibufogenin	酯蟾毒配基	C24H32O4	384.516	9.06	Steroids and steroid derivatives	类固醇及其衍生物	"465-39-4"	81120	46980	37620
Com_1056_pos	N-Caffeoyl putrescine	咖啡酰腐胺	C13H18N2O3	250.1	4.56	Cinnamic acids and derivatives	肉桂酸及其衍生物	"29554-26-5"	80830	380900	323200
Com_1148_pos	N-Caffeoylagmatine	N-咖啡酰胍	C14H20N4O3	292.33	12.38	Phenolamides	酚胺		80270	69760	70960
Com_809_pos	(-)-Arctigenin	牛蒡子苷元	C21H24O6	372.41	9.652	Lignans	木脂素类	"7770-78-7"	79750	2079000	2055000
Com_1573_pos	Aconitine	乌头碱	C34H47NO11	645.747	8.647	Alkaloids and derivatives	生物碱及其衍生物	"302-27-2"	79736	64120	48320
Com_1298_pos	2,6-Dimethoxybenzoquinone	2,6-二氧甲基-1,4-苯醌	C8H8O4	168.042	4.69	Quinones	醌类	"530-55-2"	79550	1070000	1086000
Com_1433_pos	LPC(1-acyl 18:2)	LPC(1-酰基18:2)	C26H50NO7P	519.65	12.18	Phospholipid	磷脂		78460	69380000	62470000
Com_586_neg	5-Hydroxymethyluracil	5-羟甲基尿嘧啶	C5H6N2O3	142.113	0.96	Pyrimidines and pyrimidine derivatives	嘧啶及其衍生物	"4433-40-3"	78440	193200	195900
Com_1096_pos	Cyclo(Tyr-Ala)	环(酪氨酸-丙氨酸)	C12H14N2O3	234.1	0.97	Amino Acid And Derivatives	氨基酸及其衍生物	"21754-26-7"	78370	116000	147000
Com_1192_pos	p-Coumaroyl-2-hydroxyputrescine	对甲苯丙基-2-羟丙肾上腺素	C13H18N2O3	250.29	5.57	Cinnamic acids and derivatives	肉桂酸及其衍生物		78170	60670	58620
Com_1061_pos	N-formylmethionine	N-甲酰蛋氨酸	C6H11NO3S	177	2.97	Amino Acid And Derivatives	氨基酸及其衍生物	"4289-98-9"	78054	49680	50530
Com_1566_pos	Oroxylin A	千层纸素A	C16H12O5	284.263	10.55	Flavones and Flavonols	黄酮和黄酮醇	"480-11-5"	78020	1457000	1384000
Com_63_neg	2,3-Dimethylsuccinic acid	2,3-二甲基丁氨酸	C6H8O4	144.042	4.53	Amino Acid And Derivatives	氨基酸及其衍生物	"13545-04-5"	77560	122700	124900
Com_808_pos	Bornyl acetate	乙酸龙脑酯	C12H20O2	196.29	9.209	Phenols And Its Derivatives	酚类及其衍生物	"76-49-3"	77320	75990	66380
Com_996_pos	7,8-Dihydroxyflavone	7,8-二羟基黄酮	C15H10O4	254.24	8.141	Flavonoids	类黄酮	"38183-03-8"	77233	56070	42190
Com_128_neg	Quercetin 7-O-beta-D-Glucuronide	槲皮素 7-O-葡糖醛酸	C21H18O13	478.36	6.53	Flavonoids	类黄酮		77120	49500	40020
Com_1178_pos	Selgin O-hexosyl-O-hexoside	羟甲基黄酮 O-己糖基己糖苷	C28H32O17	640.552	0.97	Flavonoids	类黄酮		76940	1591000	1369000
Com_1309_pos	6-Deoxy-D-glucose	6-脱氧-D-葡萄糖	C6H12O5	164.156	0.95	Carbohydrates And Its Derivatives	糖类及其衍生物	"7658-08-4"	76780	443200	417400
Com_946_pos	Apigenin C-pentoside	芹菜素C-戊糖苷	C20H18O9	402.35	0.73	Flavonoids	类黄酮		76710	26630	47900
Com_308_neg	Pelargonin chloride	天竺葵色素苷	C27H31ClO15	630.98	4.937	Anthocyanins	花青素	"17334-58-6"	76551	30500	34630
Com_1577_pos	IBA	3-吲哚丁酸	C12H13NO2	203.24	8.845	Phytohormones	植物激素	"133-32-4"	76078	68850	64140
Com_1214_pos	Protostemonine	原百步碱	C25H31NO6	417.495	0.65	Alkaloids and derivatives	生物碱及其衍生物	"27495-40-5"	75750	55210	57320
Com_1144_pos	Nicotinuric Acid	烟酰甘氨酸	C8H8N2O3	180.161	3.42	Vitamins	维生素	"583-08-4"	75380	424700	391000
Com_1087_pos	p-Coumaric acid methyl ester	对香豆酸甲酯	C10H10O3	178.063	7.45	Cinnamic acids and derivatives	肉桂酸及其衍生物	"3943-97-3"	74890	688400	623200
Com_1553_pos	Troxerutin	曲克芦丁	C33H42O19	742.68	6.571	Flavonoids	类黄酮	"7085-55-4"	74820	351800	220100
Com_1330_pos	LysoPC 15:1	溶血磷脂酰胆碱 15:1	C23H46NO7P	479.1	11.45	Phospholipid	磷脂		74752	60790	50390
Com_1153_pos	N-Acetylneuraminic acid	N-乙酰神经氨酸	C11H19NO9	309.273	0.988	Sugar Acids And Its Derivatives	糖酸及其衍生物	"131-48-6"	74570	330900	222000
Com_224_neg	L-Lactic acid	L-乳酸	C3H6O3	90.08	1.487	Organic Acid And Its Derivatives	有机酸及其衍生物	"79-33-4"	74130	86170	89050
Com_1469_pos	Cinnamaldehyde	反式肉桂醛	C9H8O	132.16	9.209	Phenylpropanoids and polyketides	苯丙素和聚酮化合物	"14371-10-9"	74042	46590	58870
Com_453_neg	2-Deoxyribose 5'-phosphate	2-脱氧核糖 5'-磷酸	C5H11O7P	214.1	1.22	Nucleotide And Its Derivates	核苷酸及其衍生物		73970	744900	677800
Com_1188_pos	C-hexosyl-chrysoeriol O-hexoside	C-己糖基-金圣草黄素 O-己糖苷	C28H32O16	624.552	1	Flavonoids	类黄酮		73380	1121000	1085000
Com_1651_pos	NNK	4-(N-甲基-N-亚硝胺)-1-(3-吡啶基)-丁酮/4-甲基亚硝基吡啶基丁酮	C10H13N3O2	207.23	5.898	Carbonyl compounds	醛酮类	"64091-91-4"	73280	184600	151800
Com_71_neg	Ajugol	益母草苷	C15H24O9	348.346	0.93	Terpenoids	萜类	"52949-83-4"	72980	181500	192000
Com_1762_pos	(-)-epigallocatechin	表没食子儿茶素	C15H14O7	306.27	5.098	Catechin derivatives	儿茶素及其衍生物	"970-74-1"	72974	46830	43670
Com_1565_pos	Obtusifolin	决明蒽醌	C16H12O5	284.263	11.14	Anthracenes	蒽类	"477-85-0"	72921	49720	47400
Com_1694_pos	Patchouli alcohol	百秋李醇	C15H26O	222.37	14.269	Alcohols and polyols	醇类和多元醇类	"5986-55-0"	72863	66770	52230
Com_1496_pos	Pyridoxine di-O-hexoside	吡哆醇 O-二己糖苷	C20H31NO13	493.465	0.97	Vitamins	维生素		72820	139400	121800
Com_1634_pos	Aristolochic acid B	马兜铃酸B	C16H9NO6	311.251	7.77	Organic Acid And Its Derivatives	有机酸及其衍生物	"475-80-9"	72670	75440	36180
Com_977_pos	Alisol B 23-acetate	23-乙酰泽泻醇B	C32H50O5	514.746	10.09	Terpenoids	萜类	"26575-95-1"	72640	59920	53960
Com_1478_pos	Furanodiene	呋喃二烯	C15H20O	216.323	11.23	Terpenoids	萜类	"19912-61-9"	72570	62220	73130
Com_772_pos	Citropten	5,7-二甲氧基香豆素	C11H10O4	206.19	9.6	Coumarins and derivatives	香豆素及其衍生物	"487-06-9"	72206	50660	35510
Com_491_neg	Tanshinone IIA sulfonate	丹参酮IIA-磺酸钠	C19H17NaO6S	396.39	10.656	Terpenoids	萜类	"69659-80-9"	72095	88220	86430
Com_1574_pos	(+)-Pulegone	(+)-长叶薄荷酮	C10H16O	152.233	4.71	Terpenoids	萜类	"89-82-7"	72020	114200	84920
Com_697_neg	3-O-p-coumaroyl shikimic acid O-hexoside	3-O-对香豆酰莽草酸 O-己糖苷	C22H26O12	482.1	5.92	Alcohols and polyols	醇类和多元醇类		71610	24910	47930
Com_716_neg	Physcion 8-O-Beta-D-Monoglucoside	大黄素甲醚-8-O-β-D-葡萄糖苷	C22H22O10	446.404	6.64	Quinones	醌类	"23451-01-6"	71532	34410	34760
Com_1674_pos	methylChrysoeriol 5-O-hexoside	甲基菊醇5-O-己糖苷	C23H24O11	476.43	0.97	Flavonoids	类黄酮		70790	132300	163700
Com_1585_pos	dCMP	2'-脱氧胞苷-5'-单磷酸	C9H14N3O7P	307.197	1.06	Nucleotide And Its Derivates	核苷酸及其衍生物	"1032-65-1"	70600	42250	40120
Com_1082_pos	beta-Nicotinamide Mononucleotide	β-烟酰胺单核苷酸	C11H15N2O8P	334.219	0.993	Nucleotide And Its Derivates	核苷酸及其衍生物	"1094-61-7"	70380	779400	623000
Com_1751_pos	(+)-epipinoresinol-4-O-beta-D-glucoside	(+)表松脂素-4'-O-β-D-葡萄糖苷	C26H32O11	520.53	7.12	Lignans	木脂素类	"74983-66-7"	70230	140300	125400
Com_1399_pos	Cucurbitacin I	葫芦素I	C30H42O7	514.293	0.67	Terpenoids	萜类	"2222-07-3"	69670	76950	39520
Com_859_pos	C-pentosyl-luteolin-C-hexoside	C-戊糖基-木犀草素-C-己糖苷	C26H28O15	580.49	6.38	Flavonoids	类黄酮		69660	532900	500300
Com_468_neg	L-(+)-Rhamnose Monohydrate	L-鼠李糖水合物	C6H14O6	182.17	0.96	Carbohydrates And Its Derivatives	糖类及其衍生物	"10030-85-0"	68940	119300	142600
Com_547_neg	Quinolinic acid	2,3-吡啶二羧酸	C7H5NO4	167.12	1.551	Organoheterocyclic compounds	有机杂环化合物	"89-00-9"	68840	181700	181600
Com_840_pos	Tricin 4'-O-(syringyl alcohol) ether	苜蓿素 4'-O-丁香醇醚	C26H24O10	496.46	7.31	Flavonoids	类黄酮		68636	82900	87100
Com_1221_pos	Folic acid	叶酸	C19H19N7O6	441.4	5.117	Amino Acid And Derivatives	氨基酸及其衍生物	"59-30-3"	68480	13400	21390
Com_459_neg	3-Indoleacrylic acid	3-吲哚丙烯酸	C11H9NO2	187.195	5.36	Indoles and derivatives	吲哚及其衍生物	"1204-06-4"	67830	54020	24030
Com_37_neg	ADP-ribose	ADP核糖	C15H23N5O14P2	591.315	1.05	Nucleotide And Its Derivates	核苷酸及其衍生物	"20762-30-5"	67740	275900	248500
Com_61_neg	Allantoin	尿囊素	C4H6N4O3	158.115	0.94	Organoheterocyclic compounds	有机杂环化合物	"97-59-6"	67640	35490	43000
Com_1740_pos	Sec-O-Glucosylhamaudol	亥茅酚苷	C21H26O10	438.425	8.108	Organoheterocyclic compounds	有机杂环化合物	"80681-44-3"	67051	42630	53610
Com_1068_pos	Galanthamine	加兰他敏	C17H21NO3	287.35	4.91	Alkaloids and derivatives	生物碱及其衍生物	"357-70-0"	66637	34540	41240
Com_564_neg	1-Methylguanine	1-甲基鸟嘌呤	C6H7N5O	165.153	4.09	Purines and purine derivatives	嘌呤及其衍生物	"938-85-2"	66390	45550	48210
Com_640_neg	(7S,8S)-DiHODE	7,8-二羟基-9,12-十八碳二烯酸	C18H32O4	312.23	1.3	Fatty Acyls	脂肪酰类	"143288-65-7"	66310	46650	44030
Com_742_neg	4-Methylcatechol	4-甲基儿茶酚	C7H8O2	124.137	6.85	Phenols And Its Derivatives	酚类及其衍生物	"452-86-8"	66160	20480	26650
Com_1048_pos	4-Hydroxycoumarin	4-羟基香豆素	C9H6O3	162.145	4.36	Coumarins and derivatives	香豆素及其衍生物	"1076-38-6"	66030	84850	56910
Com_1142_pos	Veratramine	藜芦碱	C27H39NO2	409.6	8.1	Alkaloids and derivatives	生物碱及其衍生物	"60-70-8"	66000	28420	23110
Com_1506_pos	Ammothamnine	氧化苦参碱	C15H24N2O2	264.36	4.64	Alkaloids and derivatives	生物碱及其衍生物	"16837-52-8"	64220	64340	74640
Com_800_pos	Imperialine	西贝母碱	C27H43NO3	429.635	6.799	Alkaloids and derivatives	生物碱及其衍生物	"61825-98-7"	63730	115600	132600
Com_818_pos	(-)-chimonanthine	山蜡梅碱	C22H26N4	346.476	7.98	Indoles and derivatives	吲哚及其衍生物	"5545-89-1"	63312	42450	60680
Com_703_neg	4-Hydroxy-3-methoxycinnamic acid	4-羟基-3-甲氧基肉桂酸	C10H10O4	194.058	5.34	Cinnamic acids and derivatives	肉桂酸及其衍生物	"537-98-4"	63270	2573000	3172000
Com_190_neg	Sibiricose A6	西伯利亚远志糖A6	C23H32O15	548.497	5.49	Phenylpropanoids	苯丙素类	"241125-75-7"	62950	49630	59410
Com_635_neg	Poncirin	枸橘苷	C28H34O14	594.561	8.049	Flavanones	黄烷酮	"14941-08-3"	62940	11730000	11350000
Com_849_pos	N-(Phenylacetyl)-L-phenylalanine	N-(苯乙酰)-L-苯丙氨酸	C17H17NO3	283.322	4.09	Amino Acid And Derivatives	氨基酸及其衍生物	"738-75-0"	62790	30410	26090
Com_297_neg	8-Gingerol	8-姜酚	C43H32O20	868.702	1.13	Catechin derivatives	儿茶素及其衍生物	"30462-35-2"	62690	92980	109700
Com_1755_pos	Triptolide	雷公藤内酯醇	C20H24O6	360.407	9.19	Organoheterocyclic compounds	有机杂环化合物	"38748-32-2"	62352	83740	79450
Com_440_neg	Menadione	维生素K3	C11H10O5S	254.262	1.1	Vitamins	维生素	"130-37-0"	62010	100800	124600
Com_1050_pos	4-Hydroxytolbutamide	4-羟基甲苯磺丁脲	C12H18N2O4S	286.35	6.3	Benzene and substituted derivatives	苯及其取代衍生物	"5719-85-7"	61990	87310	82890
Com_182_neg	Bisulfurous Acid	甲萘醌	C11H8O2	172.18	0.95	Quinones	醌类	"58-27-5"	61890	93330	85000
Com_32_neg	3-(2-Naphthyl)-D-Alanine	3-(2-萘基)-D-丙氨酸	C13H13NO2	215.248	6.22	Amino Acid And Derivatives	氨基酸及其衍生物	"76985-09-6"	61470	41600	27750
Com_551_neg	Tiliroside	椴树苷	C30H26O13	594.52	7.879	Flavones and Flavonols	黄酮和黄酮醇	"20316-62-5"	61430	8458000	10490000
Com_1006_pos	N,N-Dimethyl-1,4-phenylenediamine	N,N-二甲基对苯二胺	C8H12N2	136.194	4.43	Amines	胺类	"99-98-9"	61280	86550	85270
Com_220_neg	H-HoArg-OH	高精氨酸	C7H16N4O2	188.23	0.807	Amino Acid And Derivatives	氨基酸及其衍生物	"156-86-5"	60860	51830	47520
Com_1406_pos	Verbascoside	毛蕊花糖苷	C29H36O15	624.59	6.581	Cinnamic acids and derivatives	肉桂酸及其衍生物	"61276-17-3"	60500	89030	92300
Com_1618_pos	Dihydrotanshinone I	15,16-二氢丹参酮I	C18H14O3	278.302	11.812	Quinones	醌类	"87205-99-0"	60230	35450	66460
Com_1389_pos	Kolavic acid	考拉维酸	C20H30O4	334.45	5.81	Terpene	萜烯	"26380-58-5"	59770	59110	67770
Com_143_neg	Lysops 22:6	溶血卵磷脂酰丝氨酸22:6	C28H44NO9P	569.62	13.14	Phospholipid	磷脂		59334	31850	23880
Com_1649_pos	Curdione	莪术二酮	C15H24O2	236.35	11.95	Terpenoids	萜类	"13657-68-6"	59090	739200	558800
Com_1293_pos	Gallacetophenone	没食子苯乙酮	C8H8O4	168.042	4.69	Ketones	酮类	"528-21-2"	59070	761500	821500
Com_435_neg	8-Epiloganic acid	8-表马钱子酸	C16H24O10	376.36	4.83	Terpenoids	萜类	"82509-41-9"	58450	45470	39540
Com_525_neg	Formononetin	芒柄花黄素	C16H12O4	268.27	9.556	Isoflavonoids	异黄酮	"485-72-3"	58401	25060	28610
Com_31_neg	2-deoxyglucose-6-phosphate	6-磷酸-2-脱氧葡萄糖	C6H13O8P	244.136	0.98	Nucleotide And Its Derivates	核苷酸及其衍生物	"3573-50-0"	58270	442400	311600
Com_285_neg	Methyl Vanillate	香草酸甲酯	C9H10O4	182.17	7.89	Benzoic acids and derivatives	苯甲酸及其衍生物	"3943-74-6"	57923	26390	19580
Com_677_neg	4-Methoxysalicylic acid	4-甲氧基水杨酸	C8H8O4	168.15	8.22	Benzoic acids and derivatives	苯甲酸及其衍生物	"2237-36-7"	57580	20150	14250
Com_889_pos	6-Methylcoumarin	6-甲基香豆素	C10H8O2	160.17	9.238	Coumarins and derivatives	香豆素及其衍生物	"92-48-8"	57522	95780	76410
Com_107_neg	Hydroxygenkwanin	羟基芫花素	C16H12O6	300.263	9.594	Flavonoids	类黄酮	"20243-59-8"	57380	27980	28090
Com_1395_pos	C-hexosyl-apigenin O-caffeoylhexoside	C-己糖基-芹菜素O-咖啡酰外酯	C36H36O18	756.66	6.54	Flavonoids	类黄酮		57120	45310	66790
Com_719_neg	Lumichrome	光色素	C12H10N4O2	242.233	5.93	Alkaloids and derivatives	生物碱及其衍生物	"1086-80-2"	56610	48800	45510
Com_425_neg	L-Cycloserine	环丝氨酸	C3H6N2O2	102.09	0.8	Amino Acid And Derivatives	氨基酸及其衍生物	"339-72-0"	56430	101100	99730
Com_307_neg	Myricetin	杨梅素	C15H10O8	318.24	7.34	Flavones and Flavonols	黄酮和黄酮醇	"529-44-2"	56280	84730	72430
Com_900_pos	Tricin 5-O-acetylglucoside	苜蓿素 5-O-乙酰基己糖苷	C25H26O13	534.109	6.1	Flavonoids	类黄酮		55385	77650	80130
Com_65_neg	Sinapic acid-O-glucoside	芥子酸-O-葡萄糖苷	C17H22O10	386.356	5.9	Phenols And Its Derivatives	酚类及其衍生物		55360	201700	377500
Com_343_neg	N7-Methylguanosine	7-甲基鸟苷	C11H17N5O5	298.275	5.46	Nucleotide And Its Derivates	核苷酸及其衍生物	"20244-86-4"	55030	8787	16480
Com_1603_pos	N-Lauryldiethanolamine	十二烷基乙醇胺	C16H35NO2	273.455	9.62	Amines	胺类	"1541-67-9"	54940	77810	72310
Com_563_neg	4-Hydroxy-3-methoxyphenylglycol sulfate potassium salt	4-羟基-3-甲氧基苯基乙二醇-4-硫酸	C9H11KO7S	302.343	0.92	Benzene and substituted derivatives	苯及其取代衍生物	"71324-20-4"	54880	177700	309600
Com_1580_pos	8-C-hexosyl-apigenin O-hexosyl-O-hexoside	8-C-己糖苷-芹菜素 O-己糖苷-O-己糖苷	C33H40O20	756.669	0.9	Flavonoids	类黄酮		54750	96340	129200
Com_949_pos	N-Acetylserotonin	乙酰-羟色胺	C12H14N2O2	218.252	6.85	Amino Acid And Derivatives	氨基酸及其衍生物		54640	56290	65370
Com_70_neg	Sulfosalicylic acid	5-磺基水杨酸	C7H6O6S	218.184	1.66	Benzene and substituted derivatives	苯及其取代衍生物	"97-05-2"	54300	86910	144400
Com_372_neg	Cellotriose	D-(+)-纤维三糖	C18H32O16	504.437	1.02	Carbohydrates And Its Derivatives	糖类及其衍生物	"33404-34-1"	54130	1675000	2763000
Com_1696_pos	5-Hydroxymethylfurfural	5-羟甲基糠醛	C6H6O3	126.11	4.285	Carbonyl compounds	醛酮类	"67-47-0"	53920	3024000	2679000
Com_851_pos	N-(3-Indolylacetyl)-L-Alanine	N-(3-吲哚乙酰基)-L-丙氨酸	C13H14N2O3	246.262	6.78	Indoles and derivatives	吲哚及其衍生物	"57105-39-2"	53830	246200	293000
Com_1664_pos	Gly-Tyr-Ala	甘氨酸-酪氨酸-丙氨酸	C14H19N3O5	309.318	4.16	Amino Acid And Derivatives	氨基酸及其衍生物	"112898-27-8"	53812	38460	32800
Com_292_neg	Ginkgolide A	银杏内酯A	C20H24O9	408.4	8.19	Terpenoids	萜类	"15291-75-5"	53610	28760	13400
Com_471_neg	2-Deoxyribose 1-Phosphate	2-脱氧核糖1-磷酸	C5H11O7P	214.11	1.01	Nucleotide And Its Derivates	核苷酸及其衍生物	"17210-42-3"	53600	1284000	1284000
Com_882_pos	Sissotrin	鹰嘴豆素 7-O-葡萄糖苷	C22H22O10	446.121	6.23	Isoflavonoids	异黄酮	"5928-26-7"	53600	1176000	958000
Com_858_pos	D-Panthenol	D-泛酰醇	C9H19NO4	205.131	4.7	Fatty Acyls	脂肪酰类	"81-13-0"	53501	38680	26630
Com_1769_pos	Stylopine	人血草碱	C19H17NO4	323.349	7.15	Alkaloids and derivatives	生物碱及其衍生物	"84-39-9"	53430	88430	52670
Com_820_pos	Myrislignan	肉豆蔻木脂素	C21H26O6	374.434	10.33	Fatty Acyls	脂肪酰类	"171485-39-5"	53250	968000	981500
Com_442_neg	4-Anisic acid	p- 茴香酸	C8H8O3	152.15	8.22	Benzene and substituted derivatives	苯及其取代衍生物	"100-09-4"	53060	28260	23370
Com_1043_pos	C-pentosyl-chrysoeriol 7-O-feruloylhexoside	C-戊糖基-金圣草黄素 7-O-阿魏酰己糖苷	C37H38O18	770.21	7.52	Flavonoids	类黄酮		52910	67870	63810
Com_1597_pos	Isoxanthohumol	异黄腐醇	C21H22O5	354.396	9.58	Flavonoids	类黄酮	"70872-29-6"	51939	79430	68160
Com_407_neg	Ginsenoside-Ro	人参皂苷Ro	C48H76O19	957.119	8.86	Terpenoids	萜类	"34367-04-9"	51920	66970	72450
Com_1724_pos	Homocysteine	DL-高半胱氨酸	C4H9NO2S	135.185	0.84	Amino Acid And Derivatives	氨基酸及其衍生物	"454-29-5"	51580	95960	78720
Com_1582_pos	Apigenin 6-C-hexosyl-8-C-hexosyl-O-hexoside	芹菜素 6-C-己糖基-8-C-己糖基O-己糖苷	C33H40O20	756.669	7.4	Flavonoids	类黄酮		51460	72210	73380
Com_1645_pos	Valepotriate	缬草三酯	C22H30O8	422.469	7.56	Terpenoids	萜类	"18296-44-1"	51390	384300	387000
Com_1477_pos	4-Dimethylaminobenzaldehyde	对二氨基苯甲醛	C9H11NO	149.193	1.02	Benzene and substituted derivatives	苯及其取代衍生物	"100-10-7"	50860	26840000	27380000
Com_499_neg	Ginkgolide C	银杏内酯 C	C20H24O11	440.4	7.039	Terpenoids	萜类	"15291-76-6"	50780	18060	13580
Com_771_pos	Methyl Dihydrojasmonate	二氢茉莉酮酸甲酯	C13H22O3	226.31	11.66	Fatty Acyls	脂肪酰类	"24851-98-7"	50590	574200	394800
Com_1680_pos	Schizandrol B	五味子醇乙	C23H28O7	416.464	11.384	Phenylpropanoids	苯丙素类	"58546-54-6"	50282	30790	38380
Com_1785_pos	5-Hydroxylysine	5-羟基赖氨酸	C6H15ClN2O3	198.65	0.72	Amino Acid And Derivatives	氨基酸及其衍生物	"13204-98-3"	50270	60360	44230
Com_1022_pos	Glutathione	谷胱甘肽	C10H17N3O6S	307.32	1.51	Amino Acid And Derivatives	氨基酸及其衍生物	"70-18-8"	50160	41010	32940
Com_1727_pos	S-Lactoyglutathione	S-乳酰谷胱甘肽	C13H21N3O8S	379.386	2.65	Amino Acid And Derivatives	氨基酸及其衍生物	"25138-66-3"	50098	19260	29130
Com_695_neg	Coixol	6-甲氧基-2-苯唑啉酮/薏苡素	C8H7NO3	165.146	7.3	Organoheterocyclic compounds	有机杂环化合物	"532-91-2"	49770	29190	29520
Com_1654_pos	(+)-pinoresinol 4'-O-beta-D-glucopyranoside	(+)表松脂素-4'-O-β-D-葡萄糖苷	C26H32O11	520.533	7.38	Lignans	木脂素类	"24404-49-7"	49516	37640	35750
Com_1607_pos	N-Feruloyltyramine	N-阿魏酰酪胺	C18H19NO4	313.348	7.92	Phenols And Its Derivatives	酚类及其衍生物	"65646-26-6"	49400	101600	74040
Com_621_neg	Ketoisophorone	4-氧代异佛尔酮	C9H12O2	152.19	8.28	Carbonyl compounds	醛酮类	"1125-21-9"	49143	34440	22550
Com_1348_pos	S-(5'-Adenosyl)-L-methionine	S-(5'-腺苷)-L-蛋氨酸	C15H22N6O5S	398.137	0.83	Amino Acid And Derivatives	氨基酸及其衍生物		48830	29430	20950
Com_1564_pos	Tetrahydrojatrorrhizine	四氢药根碱	C20H23NO4	341.407	6.65	Alkaloids and derivatives	生物碱及其衍生物	"6018-39-9"	48572	96150	97190
Com_1774_pos	Icariin	淫羊藿苷	C33H40O15	676.66	8.138	Flavones and Flavonols	黄酮和黄酮醇	"489-32-7"	48350	37210	31880
Com_671_neg	Deoxyribose 5-Phosphate	2-脱氧核糖-5-磷酸钠	C5H11O7P	235.084	0.82	Pentose phosphates	磷酸戊糖途径	"102916-66-5"	47980	954100	738500
Com_1055_pos	N-Feruloyl spermidine	阿魏酰亚精胺	C17H26N3O3	320.1	17.03	Cinnamic acids and derivatives	肉桂酸及其衍生物		47950	57480	35350
Com_1533_pos	5-Hydroxyindole-3-acetic acid	5-羟基吲哚-3-乙酸	C10H9NO3	191.058	5.58	Indoles and derivatives	吲哚及其衍生物	"54-16-0"	47865	83100	70640
Com_274_neg	Cytidylic acid	5'-胞苷酸	C9H14N3O8P	323.2	0.97	Nucleotide And Its Derivates	核苷酸及其衍生物	"63-37-6"	47710	310800	295600
Com_994_pos	5-Methoxytryptamine	5-甲氧基色胺	C11H14N2O	190.24	5.4	Indoles and derivatives	吲哚及其衍生物	"608-07-1"	47650	28690	18580
Com_1682_pos	Fraxinellone	梣酮	C14H16O3	232.275	11.429	Terpenoids	萜类	"28808-62-0"	46620	41800	31720
Com_1278_pos	5-methoxyflavone	5-甲氧基黄酮	C16H12O3	252.26	10.47	Flavonoids	类黄酮	"42079-78-7"	46560	332300	302800
Com_711_neg	Cedrol	柏木脑	C15H26O	222.37	10.67	Terpenoids	萜类	"77-53-2"	46320	49350	59630
Com_319_neg	Dihydrofolic acid	二氢叶酸	C19H21N7O6	443.413	18.3	Organic Acid And Its Derivatives	有机酸及其衍生物	"4033-27-6"	46200	41940	43600
Com_1622_pos	Ganodermanontriol	灵芝马酮	C30H48O4	472.7	5.7	Terpenoids	萜类	"106518-63-2"	45295	44490	32630
Com_1765_pos	Vindoline	文多灵	C25H32N2O6	456.53	7.985	Alkaloids and derivatives	生物碱及其衍生物	"2182-14-1"	45220	33260	27120
Com_385_neg	Epimeredinoside A	广防风苷A	C31H40O15	652.649	7.56	Cinnamic acids and derivatives	肉桂酸及其衍生物		45060	98690	72950
Com_624_neg	Polydatin	虎杖苷	C20H22O8	390.38	6.543	Phenylpropanoids and polyketides	苯丙素和聚酮化合物	"65914-17-2"	44960	87850	75950
Com_727_neg	2-Hydroxybenzyl alcohol	水杨醇	C7H8O2	124.14	5.66	Alcohols and polyols	醇类和多元醇类	"90-01-7"	44062	31550	20460
Com_155_neg	5,7-Dihydroxy-4-methylcoumarin	5,7-二羟基-4-甲基香豆素	C10H8O4	192.168	7.07	Coumarins and derivatives	香豆素及其衍生物	"2107-76-8"	44030	30300	65070
Com_161_neg	Kinetin 9-riboside	激动素 9-核糖苷	C15H17N5O5	347.326	1.03	Anthocyanins	花青素	"4338-47-0"	43150	1646000	1463000
Com_1549_pos	Curcumol	莪术醇	C15H24O2	236.35	12.847	Terpenoids	萜类	"4871-97-0"	42920	28710	26390
Com_1345_pos	Glabrene	光甘草素	C20H18O4	322.361	10.49	Isoflavonoids	异黄酮	"60008-03-9"	42871	36430	25040
Com_379_neg	Isovanillin	异香草醛	C8H8O3	152.15	7.676	Phenols And Its Derivatives	酚类及其衍生物	"621-59-0"	42870	38930	40610
Com_1642_pos	Abrine	相思子碱	C12H14O2N2	218.256	5.61	Alkaloids and derivatives	生物碱及其衍生物	"526-31-8"	42010	62300	51410
Com_1637_pos	Loratadine	氯雷他定	C22H23ClN2O2	382.89	7.12	Organoheterocyclic compounds	有机杂环化合物	"79794-75-5"	41750	46840	45100
Com_1614_pos	Albiflorin	芍药内酯苷	C23H28O11	480.462	6.176	Terpenoids	萜类	"39011-90-0"	41320	37250	42770
Com_13_neg	PolygalaxanthonⅧ	远志口山酮Ⅷ	C25H28O15	568.488	6.32	Ketones	酮类		41230	7957	14650
Com_291_neg	Epigallocatechin 3-gallate	表没食子儿茶素没食子酸酯	C22H18O11	458.37	5.874	Catechin derivatives	儿茶素及其衍生物	"989-51-5"	41080	19070	14720
Com_690_neg	Homoeriodictyol	高圣草酚	C16H14O6	302.279	4.44	Flavonoids	类黄酮	"446-71-9"	40560	34080	37720
Com_1126_pos	Feruloyltyramine	阿魏酰酪胺	C18H19NO4	313	7.87	Cinnamic acids and derivatives	肉桂酸及其衍生物	"66648-43-9"	40200	86380	77220
Com_1467_pos	Irisolidone 7-O-beta-d-glucoside	尼泊尔鸢尾异黄酮 7-O-β-D-葡萄糖苷	C23H24O11	476.43	0.97	Flavonoids	类黄酮	"6009-88-7"	40080	99000	108500
Com_636_neg	2,6-Di-tert-butylphenol	2,6-二叔丁基苯酚	C14H22O	206.167	6.04	Phenolic acids	酚酸类	"128-39-2"	39750	65380	40610
Com_409_neg	Hordatine B	大麦芽胍碱B	C29H40N8O5	580.1	6.94	Benzene and substituted derivatives	苯及其取代衍生物	"10502-21-3"	39740	556400	668300
Com_1497_pos	N-Hydroxyl-tryptamine	羟基色胺	C10H12N2O	176.215	0.88	Amino Acid And Derivatives	氨基酸及其衍生物	"4761-34-6"	39160	228200	239900
Com_759_pos	L-Methionine Methyl Ester	L-蛋氨酸甲酯	C6H14ClNO2S	199.699	0.95	Amino Acid And Derivatives	氨基酸及其衍生物	"2491-18-1"	39150	82860	92900
Com_1535_pos	N-Isovaleroylglycine	N-异戊酰氨基乙酸	C7H13NO3	159.18	5.448	Amino Acid And Derivatives	氨基酸及其衍生物	"16284-60-9"	38980	8003	15120
Com_1449_pos	Arabidopyl shikimic acid	拟南芥莽草酸	C16H16O9	352.29	13.8	Alcohols and polyols	醇类和多元醇类		38974	35540	34760
Com_196_neg	Levulinic acid	4-氧代戊酸	C5H8O3	116.12	3.489	Organic Acid And Its Derivatives	有机酸及其衍生物	"123-76-2"	38900	101900	100100
Com_1266_pos	Tigogenin	剑麻皂苷元	C27H44O3	416.645	7.47	Terpenoids	萜类	"77-60-1"	38260	152700	126300
Com_693_neg	Phosphoenolpyruvic acid	磷烯醇丙酮酸	C3H5O6P	168.042	1.04	Organic Acid And Its Derivatives	有机酸及其衍生物		38160	125200	148300
Com_1636_pos	Matairesinol	罗汉松脂素	C20H22O6	358.391	8.87	Lignans	木脂素类	"580-72-3"	38030	317500	272800
Com_967_pos	N'-p-Coumaroyl putrescine	N'-对香豆酰基腐胺	C13H18N2O2	234.1	4.62	Cinnamic acids and derivatives	肉桂酸及其衍生物		37980	79300	45210
Com_439_neg	Leucosceptoside A	米团花苷A	C30H38O15	638.622	7.09	Cinnamic acids and derivatives	肉桂酸及其衍生物	"83529-62-8"	37890	196400	157400
Com_1505_pos	dGMP	2'-脱氧-5'-鸟苷酸	C10H14N5O7P	347.221	1.04	Nucleotide And Its Derivates	核苷酸及其衍生物	"902-04-5"	37830	68510	62080
Com_664_neg	Guanosine 5'-triphosphate	5'-鸟苷三磷酸	C10H16N5O14P3	523.18	0.9	Nucleotide And Its Derivates	核苷酸及其衍生物	"86-01-1"	37600	187100	194000
Com_1465_pos	Inosine-5'-monophosphate	肌苷-5'-单磷酸	C10H13N4O8P	348.206	1.05	Nucleotide And Its Derivates	核苷酸及其衍生物	"21214-07-3"	37550	1951000	1709000
Com_702_neg	S-Methylglutathione	S-甲基谷胱甘肽	C11H19N3O6S	321.1	1.12	Amino Acid And Derivatives	氨基酸及其衍生物	"2922-56-7"	37510	50330	48750
Com_1600_pos	Manglieside E		C28H38O13	582.6	5.91	Lignans	木脂素类		37200	48810	46830
Com_1554_pos	Hordenine	大麦芽碱	C10H15NO	165.23	2.834	Benzene and substituted derivatives	苯及其取代衍生物	"539-15-1"	37180	345700	294500
Com_64_neg	Sucralose	三氯蔗糖	C12H19Cl3O8	397.634	1.1	Carbohydrates And Its Derivatives	糖类及其衍生物	"56038-13-2"	37070	52560	38780
Com_972_pos	Tricin 7-O-acetylglucoside	苜蓿素 7-O-乙酰基己糖苷	C25H26O13	534.109	6.08	Flavonoids	类黄酮		36804	29630	37550
Com_1132_pos	H-Trp-NH2.HCl	L-色氨酰胺盐酸盐	C11H14ClN3O	239.7	4.587	Indoles and derivatives	吲哚及其衍生物	"67607-61-8"	36800	19760	19770
Com_68_neg	Trans,Trans-Muconic Acid	反,反-粘康酸	C6H6O4	142.109	0.99	Fatty Acyls	脂肪酰类	"3588-17-8"	36760	11720	12400
Com_496_neg	Apocynin	4-羟基-3-甲氧基苯乙酮	C9H10O3	166.17	7.04	Ketones	酮类	"498-02-2"	36490	40860	33780
Com_341_neg	Indolelactic acid	3-吲哚乳酸	C11H11NO3	205.21	6.93	Indoles and derivatives	吲哚及其衍生物	"1821-52-9"	35690	19250	10820
Com_278_neg	Zeatin riboside,trans-isomer	反式玉米素核苷	C15H21N5O5	351.358	1.16	Phytohormones	植物激素	"28542-78-1"	35500	16490	20480
Com_1457_pos	Methyl Eugenol	丁香酚甲醚	C11H14O2	178.23	10.992	Phenylpropanoids	苯丙素类	"93-15-2"	35420	138300	84760
Com_1140_pos	Curcumenol	莪术醇	C15H22O2	234.33	11.39	Terpenoids	萜类	"19431-84-6"	35360	37250	26360
Com_1448_pos	B Eupalinolide	野马追内酯B	C24H30O9	462.49	1.11	Terpenoids	萜类	"877822-40-7"	35310	272600	372900
Com_576_neg	Linolelaidic Acid (C18:2N6T)	反亚油酸	C18H32O2	280.445	15.16	Fatty Acyls	脂肪酰类	"506-21-8"	35300	120600	185600
Com_963_pos	N-p-Coumaroyl spermidine	香豆酰亚精胺	C16H25N3O2	291.1	5.34	Coumarins and derivatives	香豆素及其衍生物		35110	44820	47710
Com_608_neg	Pyridoxine 5'-phosphate	磷酸吡哆醇	C8H12NO6P	249.04	0.89	Vitamins	维生素	"447-05-2"	34990	67060	47010
Com_1117_pos	4-Ketolutein	4-酮基叶黄素	C45H54O3	582.9	0.73	Carotenoids	类胡萝卜素		34670	28700	29490
Com_339_neg	N-Acetyl-D-glucosamine 6-phosphate	6-磷酸-N乙酰-D-氨基葡萄糖	C8H16NO9P	301.188	1.81	Carbohydrates And Its Derivatives	糖类及其衍生物		34570	86830	98580
Com_1135_pos	Xanthopterin Hydrate	黄蝶呤	C6H7N5O3	197.15	7.57	Organoheterocyclic compounds	有机杂环化合物	"5979-01-1"	34570	28000	19740
Com_616_neg	3-Methoxybenzoic acid	间甲氧基苯甲酸	C8H8O3	152.15	8.19	Benzene and substituted derivatives	苯及其取代衍生物	"586-38-9"	34360	18310	19830
Com_1716_pos	Dictamnine	白鲜碱	C12H9NO2	199.205	9.81	Quinolines and derivatives	喹啉及其衍生物	"484-29-7"	34318	25880	32010
Com_1498_pos	8-C-hexosyl chrysoeriol O-hexoside	8-C-己糖基金圣草黄素 O-己糖苷	C28H32O16	624.552	0.92	Flavonoids	类黄酮		34290	1446000	1440000
Com_794_pos	S-Adenosyl-methionine	S-腺苷-甲硫氨酸	C22H30N6O8S2	570.639	0.84	Nucleotide And Its Derivates	核苷酸及其衍生物	"17176-17-9"	33700	18630	9221
Com_270_neg	O-Phosphorylethanolamine	邻磷酰乙醇胺	C2H8NO4P	141.063	0.86	Organic Acid And Its Derivatives	有机酸及其衍生物	"1071-23-4"	33520	549600	653300
Com_1547_pos	Eriodictyol C-hexoside	圣草酚C-己糖	C21H22O11	450.399	6.21	Flavonoids	类黄酮		33460	2114000	2306000
Com_936_pos	Naringenin C-hexoside	柚皮素C-己糖苷	C21H22O10	434.4	6.47	Flavanones	黄烷酮		33160	1459000	1408000
Com_1412_pos	Hydroxytomatidine	羟基番茄胺	C27H45NO3	431.65	0.99	Alkaloids and derivatives	生物碱及其衍生物		33060	16200	10840
Com_1767_pos	Oxysophocarpine	氧化槐果碱	C15H22N2O2	262.352	5.04	Alkaloids and derivatives	生物碱及其衍生物	"26904-64-3"	33060	63310	62940
Com_807_pos	LysoPC 20:0 (2n isomer)	溶血磷脂酰胆碱 20:0(2n异构)	C28H58NO7P	551.39	9.09	Phospholipid	磷脂		33000	50360	30050
Com_577_neg	7beta-Hydroxylathyrol	7-羟基千金子二萜醇	C20H30O5	350.45	9.6	Terpenoids	萜类	"34208-98-5"	32820	28300	18440
Com_1137_pos	Indigo	靛蓝	C16H10N2O2	262.26	8.18	Indoles and derivatives	吲哚及其衍生物	"482-89-3"	32640	469300	368900
Com_1076_pos	N-Propionylglycine	丙甘氨酸	C5H9NO3	131.13	2.07	Amino Acid And Derivatives	氨基酸及其衍生物	"21709-90-0"	32260	22960	14590
Com_434_neg	7-O-Methylmangiferin	7-甲氧基-芒果苷	C20H20O11	436.372	6.72	Organoheterocyclic compounds	有机杂环化合物	"31002-12-7"	32110	39080	42250
Com_1116_pos	4-Hydroxy-6-methylquinoline-3-carboxylic acid	4-羟基-6-甲基喹啉-3-羧酸	C11H9NO3	203.194	13.14	Quinolines and derivatives	喹啉及其衍生物	"35973-18-3"	31980	60860	46100
Com_1689_pos	D-Ala-D-Ala	D-丙氨酰-D-丙氨酸	C6H12N2O3	160.171	0.94	Amino Acid And Derivatives	氨基酸及其衍生物	"923-16-0"	31780	53760	52750
Com_1092_pos	Diisooctyl phthalate	邻苯二甲酸二异辛酯	C24H38O4	390.277	16.86	Benzoic acids and derivatives	苯甲酸及其衍生物	"27554-26-3"	31720	33020	36050
Com_1396_pos	LysoPC 16:0 (2n isomer)	溶血磷脂酰胆碱 16:0(2n异构)	C24H50NO7P	495.33	12.55	Phospholipid	磷脂		31670	34480000	29720000
Com_905_pos	p-Aminocinnamic acid	氨桂皮酸	C9H9NO2	163.176	4.05	Cinnamic acids and derivatives	肉桂酸及其衍生物	"2393-18-2"	31340	56050	62480
Com_1749_pos	(-)-N-[3',4'-Dihydroxy-(E)-cinnamoyl]-L-glutamic acid	N-[3',4’-二羟基-(E)-肉桂基]-L-谷氨酸	C14H15N1O7	309.271	16.07	Amino Acid And Derivatives	氨基酸及其衍生物	"860295-23-4"	31260	198600	168500
Com_1383_pos	Tricin 5-O-hexoside derivative	苜蓿素 5-O-己糖苷衍生物	C24H22O14	534.42	7.67	Flavonoids	类黄酮		31150	434200	619900
Com_705_neg	Tricin 5-O-rutinoside	苜蓿素 5-O-芸香糖苷	C29H34O16	638.1	6.88	Flavonoids	类黄酮		31020	2149000	1884000
Com_329_neg	p-Hydroxybenzaldehyde	4-羟基苯甲醛	C7H6O2	122.12	6.214	Carbonyl compounds	醛酮类	"123-08-0"	30780	174200	161700
Com_583_neg	Chrysosplenetin B	金腰乙素	C19H18O8	374.347	10.34	Flavonoids	类黄酮	"603-56-5"	30770	199200000	200300000
Com_421_neg	Nystose	耐斯糖	C24H42O21	666.578	1.03	Carbohydrates And Its Derivatives	糖类及其衍生物	"13133-07-8"	30740	513000	521000
Com_1323_pos	N-Feruloyl-3-methoxytyramine	N-阿魏酰-3-甲氧基酪胺	C19H21NO5	343.142	5.72	Phenolamides	酚胺	"78510-19-7"	30730	1605000	1769000
Com_392_neg	Lathyrol	千金子二萜醇	C20H30O4	334.45	11.17	Terpenoids	萜类	"34420-19-4"	30414	15670	15260
Com_1570_pos	Catharanthine hemitartrate	长春质碱酒石酸	C25H30N2O8	486.514	7.53	Alkaloids and derivatives	生物碱及其衍生物	"4168-17-6"	30190	12920	8717
Com_157_neg	martynoside	地黄苷	C31H40O15	652.65	7.59	Cinnamic acids and derivatives	肉桂酸及其衍生物	"67884-12-2"	30100	56500	61940
Com_1074_pos	N-p-Cinnamoylagmatine	N-p-肉桂酰胍丁胺	C14H20N4O	260.3	12.67	Cinnamic acids and derivatives	肉桂酸及其衍生物		29980	1293000	1006000
Com_707_neg	3-N-Methyl-L-histidine	3-N-甲基-L-组氨酸	C7H11N3O2	169.181	0.85	Amino Acid And Derivatives	氨基酸及其衍生物	"368-16-1"	29800	321700	287900
Com_263_neg	Saikosaponin E	柴胡皂苷E	C42H68O12	764.994	10.71	Terpenoids	萜类	"64340-44-9"	29725	13370	10260
Com_1756_pos	Tussilagone	款冬酮	C23H34O5	390.52	6.51	Terpenoids	萜类	"84625-50-3"	29700	157300	112700
Com_1594_pos	Irigenin	野鸢尾黄素	C18H16O8	360.315	9.17	Isoflavonoids	异黄酮	"548-76-5"	29660	68400	71110
Com_1010_pos	beta-Nicotinamide adenine dinucleotide phosphate	烟酰胺腺嘌呤二核苷酸磷酸	C21H29N7O17P3	744.41	1.03	Nucleotide And Its Derivates	核苷酸及其衍生物	"53-59-8"	29530	51560	29280
Com_1681_pos	Carnosol	鼠尾草酚	C20H26O4	330.418	12.05	Phenols And Its Derivatives	酚类及其衍生物	"5957-80-2"	29180	25150	22100
Com_1517_pos	Tricin 4'-O-(β-guaiacylglyceryl) ether O-hexoside	苜蓿素 4'-O-（β-愈创木酰基甘油基）醚O-己糖苷	C33H36O16	688.639	7.4	Flavonoids	类黄酮		28901	27530	32050
Com_1687_pos	Delphinidin 3-sophoroside-5-rhamnoside	3-槐苷-5-鼠李糖苷	C33H41O21Cl1	809.12	5.42	Anthocyanins	花青素		28890	1408000	1146000
Com_1677_pos	methylNaringenin C-pentoside	甲基柚皮素C-戊糖苷	C21H22O9	418.394	0.72	Flavonoids	类黄酮		28770	11520	10900
Com_1234_pos	Beta 2-Solanine	β2-茄碱	C39H63NO11	721.44	13.8	Alkaloids and derivatives	生物碱及其衍生物	"61877-94-9"	28640	143000	138600
Com_647_neg	Cyanin chloride	花青素苷	C27H31ClO16	646.98	4.725	Anthocyanins	花青素	"2611-67-8"	28490	227700	177700
Com_1337_pos	Limonin	柠檬苦素	C26H30O8	470.51	9.981	Terpenoids	萜类	"1180-71-8"	28440	80860000	79160000
Com_373_neg	Rhein	大黄酸	C15H8O6	284.225	10.11	Anthocyanins	花青素	"478-43-3"	28350	465300	495800
Com_303_neg	5'-Adenylic acid	5'-腺嘌呤核苷酸	C10H14N5O7P	347.221	1.036	Pentose phosphates	磷酸戊糖途径	"61-19-8"	28260	1503000	1216000
Com_1204_pos	Nuciferine	荷叶碱	C19H21NO2	295.38	7.63	Alkaloids and derivatives	生物碱及其衍生物	"475-83-2"	28110	70750	69160
Com_666_neg	Yuheinoside	鱼腥草苷	C16H24O9	360.356	4.39	Iridoid derivatives	环烯醚萜衍生物	"72396-01-1"	27838	17240	16430
Com_1641_pos	Wulignan A1	五脂素A1	C20H22O5	342.392	9.5	Lignans	木脂素类	"117047-76-4"	27738	16640	25420
Com_1127_pos	C-hexosyl-chrysoeriol O-rutinoside	C-己糖基-金圣草黄素 O-芸香糖苷	C34H42O20	770.1	0.7	Flavonoids	类黄酮		27620	5453	15950
Com_1466_pos	Integrifoside A	整合素A	C21H36O8	416.5	6.7	Terpene	萜烯		27588	34770	39560
Com_1327_pos	N-Caffeoylputrescine	N-咖啡酰腐胺	C13H18N2O3	250.29	4.57	Cinnamic acids and derivatives	肉桂酸及其衍生物		27490	346700	367700
Com_866_pos	4-Methylaminobutyrate	N-甲基-4-氨基丁酸	C5H11NO2	117.07	0.92	Amino Acid And Derivatives	氨基酸及其衍生物	"1119-48-8"	27460	385700	406900
Com_1228_pos	Monopalmitin	单棕榈酸甘油酯	C19H38O4	330.277	13.72	Glycerolipids	甘油酯	"542-44-9"	27370	122700	123100
Com_1339_pos	Osthole	蛇床子素	C15H16O3	244.29	11.929	Phenylpropanoids	苯丙素类	"484-12-8"	27140	11920000	10030000
Com_299_neg	Tricetin	五羟黄酮	C15H10O7	302.043	4.56	Flavones and Flavonols	黄酮和黄酮醇	"520-31-0"	26900	27060	29230
Com_1473_pos	Catharanthine	长春质碱	C21H24N2O2	336.43	7.569	Alkaloids and derivatives	生物碱及其衍生物	"2468-21-5"	26773	22860	25110
Com_52_neg	Chrysoeriol 8-C-pentosyl-O-rutinoside	金圣草黄素 8-C-戊糖基-O-芸香糖苷	C33H40O19	740.2	6.18	Flavonoids	类黄酮		26640	2862000	3088000
Com_691_neg	O-Phospho-L-serine	L-O-磷酸丝氨酸	C3H8NO6P	185.072	1.03	Amino Acid And Derivatives	氨基酸及其衍生物	"407-41-0"	26500	180400	170300
Com_732_neg	2,4-Di-Tert-Butylphenol	2,4-二叔丁基苯酚	C14H22O	206.167	6.02	Phenolic acids	酚酸类	"96-76-4"	26440	48400	57970
Com_112_neg	Maltotetraose	麦芽四糖	C24H42O21	666.578	0.996	Carbohydrates And Its Derivatives	糖类及其衍生物	"34612-38-9"	26380	473000	436000
Com_1118_pos	Picramnioside F	苦味酸苷F	C33H34O15	670.614	0.97	Glycosides	糖苷类		26320	158500	395700
Com_166_neg	Quinic acid O-di-glucuronic acid	奎宁酸 O-二葡萄糖醛酸	C19H28O18	544.1	1.41	Sugar Acids And Its Derivatives	糖酸及其衍生物		25960	15310	29100
Com_855_pos	C-pentosyl-apigenin O-p-coumaroylhexoside	C-戊糖基-芹菜素O-香豆酰己糖苷	C35H34O16	710.63	7.17	Flavonoids	类黄酮		25920	52170	36510
Com_1652_pos	(-)-Pinoresinol	(-)-松脂素	C20H22O6	358.391	8.88	Lignans	木脂素类	"81446-29-9"	25910	158000	129000
Com_1770_pos	Huperzine B	石杉碱乙	C16H20N2O	256.343	4.75	Alkaloids and derivatives	生物碱及其衍生物	"103548-82-9"	25800	172500	126800
Com_1141_pos	D-Pinitol	D-松醇	C7H14O6	194.18	1.24	Alcohols and polyols	醇类和多元醇类	"10284-63-6"	25620	83940	54230
Com_261_neg	Orobol	奥洛波尔	C15H10O6	286.048	11.19	Isoflavonoids	异黄酮	"480-23-9"	25350	65970	57960
Com_920_pos	Zerumbone	花姜酮	C15H22O	218.33	13.05	Terpenoids	萜类	"471-05-6"	25173	26630	27680
Com_265_neg	Butanedioicacid	脱水穿心莲内酯琥珀酸半酯	C28H36O10	532.588	6.71	Terpenoids	萜类	"786593-06-4"	25080	60800	88410
Com_1029_pos	Luteolin O-sinapoylhexoside	木犀草素 O-芥子酰己糖苷	C32H30O15	654	7.63	Flavonoids	类黄酮		24730	154200	128900
Com_359_neg	3,4-Dimethoxycinnamic acid	3,4-二甲氧基肉桂酸	C11H12O4	208.211	7.909	Cinnamic acids and derivatives	肉桂酸及其衍生物	"2316-26-9"	24600	117300	148300
Com_1488_pos	Palmitoylethanolamide	棕榈乙醇胺	C18H37NO2	299.492	14.41	Organic Acid And Its Derivatives	有机酸及其衍生物	"544-31-0"	24600	117500	107900
Com_246_neg	dGDP	二磷酸脱氧鸟苷	C10H15N5O10P2	427.201	1.08	Nucleotide And Its Derivates	核苷酸及其衍生物	"3493-09-2"	24530	200700	246700
Com_715_neg	Xanthoxyline	4',6-二甲基-2-羟基苯乙酮	C10H12O4	196.2	10.97	Carbonyl compounds	醛酮类	"90-24-4"	24448	14050	16560
Com_267_neg	O-Phospho-L-Tyrosine	O-磷酸酪氨酸	C9H12NO6P	261.168	0.94	Amino Acid And Derivatives	氨基酸及其衍生物	"21820-51-9"	24440	52980	59330
Com_402_neg	Cistanoside F	肉苁蓉苷 F	C21H28O13	488.445	5.02	Fatty Acyls	脂肪酰类	"97411-47-7"	24410	165200	177100
Com_1258_pos	N'-Feruloyl putrescine	N'-阿魏酰腐胺	C14H20N2O3	264.1	5.1	Phenolamides	酚胺		24230	101700	125800
Com_1031_pos	Luteolin 3',7-di-O-glucoside	木犀草素 3‘,7-二氧葡萄糖苷	C27H30O16	610.1	4.66	Flavonoids	类黄酮		24056	79630	75270
Com_1359_pos	Rhynchophylline	钩藤碱	C22H28N2O4	384.469	7.58	Alkaloids and derivatives	生物碱及其衍生物	"76-66-4"	23901	18180	24240
Com_369_neg	Melittoside	密力特苷	C21H32O15	524.47	0.7	Terpenoids	萜类	"19467-03-9"	23110	52730	36990
Com_811_pos	Astragaloside IV	黄芪甲苷	C41H68O14	784.97	9.419	Terpenoids	萜类	"84687-43-4"	23000	18770	8297
Com_878_pos	Pyridoxamine	吡多胺	C8H12N2O2	168.09	0.8	Pyridines and derivatives	吡啶及其衍生物	"85-87-0"	22910	62620	78580
Com_1544_pos	DL-threo-beta-Methylaspartic acid	DL-β-甲基天冬氨酸	C5H9NO4	147.129	0.89	Amino Acid And Derivatives	氨基酸及其衍生物		22890	36920	21200
Com_218_neg	Salvianolic acid C	丹酚酸C	C26H20O10	492.431	8.323	Phenolic acids	酚酸类	"115841-09-3"	22810	16050	17060
Com_1413_pos	olivil	橄榄脂素	C20H24O7	376.407	8.84	Lignans	木脂素类	"2955-23-9"	22593	27610	24910
Com_674_neg	Aleuritic Acid	紫胶桐酸	C16H32O5	304.42	8.09	Organic Acid And Its Derivatives	有机酸及其衍生物	"533-87-9"	22590	8851	7778
Com_171_neg	2,4-Dihydroxyacetophenone	2,4-二羟基苯乙酮	C8H8O3	152.15	8.14	Ketones	酮类	"89-84-9"	22470	26920	37740
Com_1643_pos	Vincosamide	喜果苷	C26H30N2O8	498.533	8.61	Indoles and derivatives	吲哚及其衍生物	"23141-27-7"	22310	31610	27120
Com_1271_pos	Bufalin	蟾毒灵	C24H34O4	386.532	10.2	Steroids and steroid derivatives	类固醇及其衍生物	"465-21-4"	22297	11030	15110
Com_1658_pos	Adenosine5-phosphosulfate	腺苷5-磷酰硫酸二钠盐	C10H13N5NaO10PS	449.266	1.05	Nucleotide And Its Derivates	核苷酸及其衍生物	"102029-95-8"	22050	141100	167800
Com_1684_pos	Norisoboldine	去甲异波尔定	C18H19NO4	313.348	5.649	Alkaloids and derivatives	生物碱及其衍生物	"23599-69-1"	21835	11820	25110
Com_395_neg	3,5-Dimethoxyphenol	3,5-二甲氧基苯酚	C8H10O3	154.16	7.742	Phenols And Its Derivatives	酚类及其衍生物	"500-99-2"	21735	20470	11530
Com_821_pos	Suberosin	软木花椒素	C15H16O3	244.29	11.9	Coumarins and derivatives	香豆素及其衍生物	"581-31-7"	21660	31220000	26170000
Com_1436_pos	LPC(1-acyl 16:0)	LPC(1-酰基16:0)	C24H50NO7P	495.63	12.59	Phospholipid	磷脂		21650	22520000	18330000
Com_965_pos	N'-p-Coumaroyl agmatine	N'-对香豆酰基胍丁胺	C14H20N4O2	276.2	13.08	Cinnamic acids and derivatives	肉桂酸及其衍生物		21630	42590	34240
Com_1702_pos	1-Decanoyl-2-hydroxy-sn-glycero-3-phosphocholine	1-癸酰基-2-羟基-sn-甘油-3-磷酸胆碱	C18H38NO7P	411.5	6.35	Cholines	胆碱		21340	69130	69630
Com_1001_pos	TriacetonaMine	四甲基哌啶酮	C9H17NO	155.24	2.28	Alkaloids and derivatives	生物碱及其衍生物	"826-36-8"	21260	12890	20860
Com_1340_pos	Matrine	苦参碱	C15H24N2O	248.36	4.329	Alkaloids and derivatives	生物碱及其衍生物	"519-02-8"	21180	56240	34470
Com_420_neg	Sinigrin	黑介子硫苷酸钾	C10H16KNO9S2	397.464	1.751	Organic Acid And Its Derivatives	有机酸及其衍生物	"3952-98-5"	20960	20250	12710
Com_153_neg	Anthranilate O-hexosyl-O-hexoside	邻氨基苯甲酸 二己糖苷	C19H27NO12	461.1	0.98	Benzoic acids and derivatives	苯甲酸及其衍生物		20830	32030	41230
Com_1275_pos	S-(-)-Cotinine	可替宁	C10H12N2O	176.215	1.89	Pyridines and derivatives	吡啶及其衍生物	"486-56-6"	20740	25840	24030
Com_1302_pos	1-Hexadecanol	棕榈醇	C16H34O	242.441	5.25	Fatty Acyls	脂肪酰类	"36653-82-4"	20740	290600	298000
Com_1746_pos	DHZROG	二氢玉米素核苷-O-葡萄糖苷	C21H33N5O10	515.514	1.01	Phytohormones	植物激素	"62512-95-2"	20540	118200	69990
Com_1617_pos	Sanguinarine	血根碱	C20H14NO4+	332.329	7.53	Alkaloids and derivatives	生物碱及其衍生物	"2447-54-3"	20430	15970	18220
Com_1049_pos	4-Hydroxymephenytoin	4-羟基美芬妥因	C12H14N2O3	234.255	11.26	Organoheterocyclic compounds	有机杂环化合物	"61837-65-8"	20380	67750	35650
Com_1086_pos	L-cysteine	L-半胱氨酸	C3H7NO2S	121.16	0.88	Amino Acid And Derivatives	氨基酸及其衍生物	"52-90-4"	20250	27410	16530
Com_405_neg	Tuberonic Acid	Tuberonic Acid	C12H18O4	226.121	0.92	Fatty Acyls	脂肪酰类	"124649-26-9"	20230	93450	92100
Com_235_neg	cis-Vaccenic acid	11-十八碳烯酸	C18H34O2	282.256	15.78	Fatty Acyls	脂肪酰类	"506-17-2"	19930	15750	16260
Com_1163_pos	5,7-Dihydroxy-3',4',5'-trimethoxyflavone	5,7-二羟基-3',4',5'-三甲氧基黄酮	C18H16O7	344.09	4.99	Flavonoids	类黄酮	"18103-42-9"	19570	208000	207600
Com_874_pos	Isopimpinellin	异虎耳草素	C13H10O5	246.216	9.746	Coumarins and derivatives	香豆素及其衍生物	"482-27-9"	19540	1051000	823000
Com_1322_pos	N-Acetyl-D-mannosamine	N-乙酰-D-甘露糖胺	C8H15NO6	221.09	10.6	Carbohydrates And Its Derivatives	糖类及其衍生物	"7772-94-3"	19510	85610	70650
Com_1375_pos	Arecoline	槟榔碱	C8H13NO2	155.197	1.24	Alkaloids and derivatives	生物碱及其衍生物	"63-75-2"	19310	18770	20560
Com_1190_pos	3’,4’,5’-Tricetin O-malonylhexoside	3’,4’,5’-麦黄酮O-丙二酰己糖苷	C27H28O15	592.51	7.7	Flavonoids	类黄酮		19310	63730	67290
Com_1569_pos	Sinapine	芥子碱	C16H24NO5	310.37	5.75	Cinnamic acids and derivatives	肉桂酸及其衍生物	"18696-26-9"	19020	1151000	1098000
Com_1557_pos	Hirsutine	毛钩藤碱	C22H28N2O3	368.476	8.42	Alkaloids and derivatives	生物碱及其衍生物	"7729-23-9"	18949	7644	5038
Com_1334_pos	LysoPC 10:0	溶血磷脂酰胆碱 (1-酰基10:0)	C18H38NO7P	411.3	6.25	Phospholipid	磷脂		18900	58040	53150
Com_382_neg	Gibberellin A3	赤霉素A3	C19H22O6	346.37	6.768	Phytohormones	植物激素	"77-06-5"	18740	26940	32480
Com_1620_pos	Alantolactone	土木香内酯	C15H20O2	232.32	12.565	Organoheterocyclic compounds	有机杂环化合物	"546-43-0"	18520	31020	28440
Com_168_neg	Eudesmoyl quinic acid	菊酯酰奎宁酸	C17H22O10	386.1	4.44	Alcohols and polyols	醇类和多元醇类		18460	681700	692900
Com_1754_pos	1,3-Dimethyluric Acid	1,3-二甲基尿酸	C7H8N4O3	196.163	11.73	Organic Acid And Its Derivatives	有机酸及其衍生物	"944-73-0"	18350	24460	14110
Com_176_neg	Phosphoenolpyruvate	磷酸烯醇式丙酮酸	C3H5O6P	167.982	0.97	Organic Acid And Its Derivatives	有机酸及其衍生物	"138-08-9"	18270	57490	58650
Com_1610_pos	N-Feruloylserotonin	N-阿魏羟色胺	C20H20N2O4	352.384	12.14	Phenolamides	酚胺	"68573-23-9"	18260	58160	45770
Com_463_neg	D-sedoheptulose-1-7-phosphate	1-7-磷酸化-D-景天庚酮糖	C7H13BaO10P	425.473	8.7	Carbohydrates And Its Derivatives	糖类及其衍生物		18180	161700	186100
Com_508_neg	Vitamin B1	维生素B1	C12H17ClN4OS	300.808	0.82	Vitamins	维生素	"59-43-8"	18100	12100	17130
Com_1034_pos	Chrysoeriol 6-C-hexoside 8-C-hexoside-O-hexoside	金圣草黄素 6-C-己糖基 8-C-己糖基-O-己糖苷	C34H42O21	786.1	0.95	Flavonoids	类黄酮		18050	184900	154100
Com_1377_pos	(+)-Fangchinoline	防己诺林碱	C37H40N2O6	608.72	6.422	Lignans	木脂素类	"436-77-1"	18050	470700	579100
Com_67_neg	Polyphyllin Vii	重楼皂苷Ⅶ	C51H84O22	1049.2	1	Saponin	皂苷	"68124-04-9"	18020	77440	89140
Com_654_neg	5,6-Dehydroginsenoside Rd	5,6-脱氢人参皂苷Rd	C48H80O18	945.152	8.61	Terpenoids	萜类	"1268459-68-2"	17930	14000	9977
Com_289_neg	Curcumin	姜黄素	C21H20O6	368.38	10.897	Phenols And Its Derivatives	酚类及其衍生物	"458-37-7"	17930	10520	6518
Com_1414_pos	Homoharringtonine	高三尖杉酯碱	C29H39NO9	545.63	6.19	Alkaloids and derivatives	生物碱及其衍生物	"26833-87-4"	17874	25700	17810
Com_553_neg	4-Methylvaleric Acid	4-甲基戊酸	C6H12O2	116.158	0.89	Organic Acid And Its Derivatives	有机酸及其衍生物	"646-07-1"	17850	24450	21390
Com_844_pos	Ajmaline	阿义马林	C20H26N2O2	326.433	6.69	Alkaloids and derivatives	生物碱及其衍生物	"4360-12-7"	17770	64590	73290
Com_366_neg	Methylophiopogonanone A	甲基麦冬二氢高异黄酮A	C19H18O6	342.343	0.78	Flavonoids	类黄酮	"74805-92-8"	17750	179900	204300
Com_1303_pos	1-Monopalmitin	1-棕榈酸单甘油酯	C19H38O4	330.503	11.26	Fatty Acyls	脂肪酰类	"19670-51-0"	17660	18420	17270
Com_1202_pos	LysoPC 18:2 (2n isomer)	溶血磷脂酰胆碱 18:2(2n异构)	C26H50NO7P	519	11.95	Phospholipid	磷脂		17620	24730000	19740000
Com_644_neg	Spinosin	斯皮诺素	C28H32O15	608.545	6.418	Flavones and Flavonols	黄酮和黄酮醇	"72063-39-9"	17610	120600	105700
Com_364_neg	Butylparaben	对羟基苯甲酸丁酯	C11H14O3	194.227	6.84	Benzoic acids and derivatives	苯甲酸及其衍生物	"94-26-8"	17593	11550	9072
Com_1703_pos	1-O-Palmitoylhexitol	1-0-棕榈酰六醇	C27H44O7	480.634	9.12	Fatty Acyls	脂肪酰类		17503	13380	18110
Com_966_pos	N-p-Coumaroyl agmatine	N-对香豆酰丁胺	C14H20N4O2	276.1	13.08	Cinnamic acids and derivatives	肉桂酸及其衍生物		17430	36180	48130
Com_1073_pos	N-p-Cinnamoylputrescine	N-P-肉桂酰腐胺	C13H18N2O	218.29	13.23	Cinnamic acids and derivatives	肉桂酸及其衍生物		17355	21640	14310
Com_424_neg	Pyridoxal 5-phosphate monohydrate	5-磷酸吡哆醛水合物	C8H12NO7P	265.16	1.7	Pyridines and derivatives	吡啶及其衍生物	"41468-25-1"	17290	11670	20440
Com_1733_pos	LPC(1-acyl 18:3)	LPC(1-酰基18:3)	C26H48NO7P	517.63	12.59	Phospholipid	磷脂		17220	12620000	9887000
Com_817_pos	3-[(Carboxycarbonyl)amino]-L-alanine	三七素	C5H8N2O5	176.129	0.84	Organic Acid And Its Derivatives	有机酸及其衍生物	"5302-45-4"	17195	31330	22260
Com_1005_pos	N', N''-DiFeruloylspermidine	N',N“-二阿魏酰亚精胺	C27H35N3O6	497.58	6.5	Phenolamides	酚胺		17090	39230	35020
Com_1147_pos	N-Feruloylspermidine	N-阿魏酰亚精胺	C17H27N3O3	321.41	4.52	Phenolamides	酚胺		17060	21290	57910
Com_287_neg	Echinacoside	松果菊苷	C35H46O20	786.73	5.89	Polyphenol	多酚	"82854-37-3"	16970	320300	258500
Com_847_pos	Sanguinarine chloride	血根氯铵	C20H14ClNO4	367.78	7.5	Alkaloids and derivatives	生物碱及其衍生物	"5578-73-4"	16910	462200	399300
Com_461_neg	Inosine 5'-Monophosphate	5'-肌苷酸	C10H13N4O8P	348.206	10.51	Nucleotide And Its Derivates	核苷酸及其衍生物	"131-99-7"	16867	8917	10930
Com_982_pos	LysoPC 16:1	溶血磷脂酰胆碱 16:1	C24H48NO7P	493.3	11.57	Phospholipid	磷脂		16760	119400	110000
Com_201_neg	N-Acetylglucosamine	N-乙酰氨基葡萄糖	C8H15NO6	221.21	0.984	Carbohydrates And Its Derivatives	糖类及其衍生物	"7512-17-6"	16670	18220	16750
Com_540_neg	GDP-alpha-D-glucose	鸟苷二磷酸糖	C16H25N5O16P2	637.34	1.02	Nucleotide And Its Derivates	核苷酸及其衍生物	"5750-57-2"	16600	67440	67980
Com_227_neg	UDP-galactose	尿苷-5'-二磷酸半乳糖	C15H22N2Na2O17P2	610.265	0.92	Nucleotide And Its Derivates	核苷酸及其衍生物	"2956-16-3"	16140	4256000	4123000
Com_272_neg	Azetidine-2-carboxylic acid	L-铃兰氨酸	C4H7NO2	101.1	0.86	Amino Acid And Derivatives	氨基酸及其衍生物	"2517-04-6"	16130	17950	36400
Com_1067_pos	Perillyl alcohol	紫苏醇	C10H16O	152.23	1.3	Terpenoids	萜类	"536-59-4"	16054	15640	15520
Com_21_neg	UDP-D-xylose	尿苷-5'-二磷酸-D-木糖	C14H22N2O16P2	536.044	0.9	Nucleotide And Its Derivates	核苷酸及其衍生物	"3616-06-6"	15960	81800	108400
Com_205_neg	Hesperetin	橙皮素	C16H14O6	302.27	8.972	Flavanones	黄烷酮	"520-33-2"	15630	377800	386100
Com_554_neg	3-Hydroxy-glabrol	3-羟基光甘草酚	C25H28O5	40.499	4.82	Flavonoids	类黄酮	"74148-41-7"	15500	17730	34610
Com_1559_pos	Oxypeucedanin hydrate	水合氧化前胡素	C16H16O6	304.299	8.29	Phenylpropanoids	苯丙素类	"2643-85-8"	15360	5503000	5253000
Com_1217_pos	pterosin A	蕨素A	C15H20O3	248.317	0.65	Terpenoids	萜类	"35910-16-8"	15120	6943	10770
Com_592_neg	Silymarin	水飞蓟宾	C25H22O10	482.44	8.514	Flavonoids	类黄酮	"22888-70-6"	15100	12050	15770
Com_358_neg	Ethyl 4-Methoxycinnamate	对甲氧基肉桂酸乙酯	C12H14O3	206.238	9.518	Cinnamic acids and derivatives	肉桂酸及其衍生物	"24393-56-4"	15100	6495	4969
Com_1714_pos	Oxypeucedanin	氧化前胡素	C16H14O5	286.279	10.45	Coumarins and derivatives	香豆素及其衍生物	"737-52-0"	14970	23890	24230
Com_503_neg	UDP-D-glucose	尿苷 5'-二磷酸葡萄糖	C15H24N2O17P2	566.1	0.95	Nucleotide And Its Derivates	核苷酸及其衍生物	"133-89-1"	14930	2668000	2649000
Com_778_pos	N', N''-Dicaffeoylputrescine	N', N''-二咖啡酰腐胺	C22H24N2O6	412.43	1.08	Amines	胺类		14780	24300	22370
Com_472_neg	phosphoribosyl pyrophosphate	5-磷酸核糖基-2-焦磷酸	C5H13O14P3	196.25	0.88	Pentose phosphates	磷酸戊糖途径		14750	52690	44310
Com_1516_pos	methylLuteolin C-hexoside	甲基木犀草素 C-己糖苷	C22H22O11	448.4	0.71	Flavonoids	类黄酮		14720	12670	17300
Com_172_neg	Thymoquinone	百里醌	C10H12O2	164.2	8.68	Carbonyl compounds	醛酮类	"490-91-5"	14703	6491	8675
Com_850_pos	N',N'',N'''-Diferuloyl, caffeoylspermidine	N', N'', N'''-二阿魏酰-咖啡酰亚精胺	C36H41N3O9	659.7	5.81	Amines	胺类		14670	21440	24970
Com_66_neg	Sinapaldehyde glucoside	芥子醛配糖物	C17H22O9	370.351	1.03	Phenols And Its Derivatives	酚类及其衍生物	"154461-65-1"	14630	49030	52080
Com_253_neg	Gallocatechin-catechin	没食子儿茶素-儿茶素	C30H26O13	594.1	5.58	Flavonoids	类黄酮		14540	35900	23670
Com_10_neg	Chikusetsusponin Iva	竹节参皂苷Ⅳa	C42H66O14	794.977	9.34	Terpenoids	萜类	"51415-02-2"	14510	828500	865000
Com_1613_pos	Asperulosid	车叶草苷	C18H22O11	414.361	5.675	Carbohydrates And Its Derivatives	糖类及其衍生物	"14259-45-1"	14490	165600	125700
Com_76_neg	4-Hydroxybenzyl alcohol	对羟基苯甲醇	C7H8O2	124.14	4.93	Benzene and substituted derivatives	苯及其取代衍生物	"623-05-2"	14400	7187	12910
Com_376_neg	Diethyl phosphate	磷酸二乙酯	C4H11O4P	154	4.2	Organic Acid And Its Derivatives	有机酸及其衍生物	"598-02-7"	14360	10170	11140
Com_527_neg	Ethylparaben	羟苯乙酯	C9H10O3	166.17	8.703	Benzene and substituted derivatives	苯及其取代衍生物	"120-47-8"	14360	15030	9886
Com_417_neg	Sweroside	当药苷	C16H22O9	358.341	6.017	Terpenoids	萜类	"14215-86-2"	14215	11470	6993
Com_673_neg	4-Hydroxy-L-Glutamic Acid	4-羟基-L-谷氨酸	C5H7NO5	161.11	18.53	Amino Acid And Derivatives	氨基酸及其衍生物	"2485-33-8"	14150	13610	10400
Com_819_pos	Panaxydol	人参环氧炔醇	C17H24O2	260.376	7.85	Fatty Acyls	脂肪酰类	"72800-72-7"	14070	80280000	76020000
Com_1558_pos	Ligustroflavone	女贞苷	C33H40O18	724.669	9.84	Flavonoids	类黄酮	"260413-62-5"	13974	11250	9579
Com_918_pos	Prohydrojasmon	茉莉酮	C15H26O3	254.37	13.034	Fatty Acyls	脂肪酰类	"158474-72-7"	13923	17360	10580
Com_221_neg	Thiamine pyrophosphate	焦磷酸硫胺素	C12H19ClN4O7P2S	460.77	0.915	Vitamins	维生素	"154-87-0"	13884	13200	12270
Com_682_neg	2,6-Dihydroxyanthraquinone	2,6-二羟基蒽醌	C14H8O4	240.21	9.32	Flavonoids	类黄酮	"84-60-6"	13724	10340	5955
Com_1274_pos	5,6,7-Trimethoxyflavone	黄岑素-5,6,7-三甲醚	C18H16O5	312.317	10.5	Flavonoids	类黄酮	"973-67-1"	13650	74130000	65040000
Com_917_pos	3-Indoleacetonitrile	吲哚-3-乙腈	C10H8N2	156.18	1.09	Indoles and derivatives	吲哚及其衍生物	"771-51-7"	13570	15420	6909
Com_122_neg	Helicide	豆腐果苷	C13H16O7	284.26	4.826	Phenols And Its Derivatives	酚类及其衍生物	"80154-34-3"	13500	119900	117400
Com_1130_pos	LysoPC 18:3	溶血磷脂酰胆碱 18:3	C26H48NO7P	517.3	12.56	Phospholipid	磷脂		13440	12630000	10470000
Com_1504_pos	thiamine phosphate	磷酸硫胺素	C12H18ClN4O4PS	380.787	0.84	Nucleotide And Its Derivates	核苷酸及其衍生物	"532-40-1"	13270	38910	25230
Com_542_neg	(+)-Dihydrojasmonic acid	二氢茉莉酸	C12H20O3	212.285	9.596	Phytohormones	植物激素	"76968-33-7"	13190	8110	5696
Com_658_neg	Notoginsenoside R2	20(S)-三七皂苷R2	C41H70O13	770.999	8.78	Terpenoids	萜类	"80418-25-3"	13170	32970	21420
Com_873_pos	Corylin	补骨脂宁	C20H16O4	320.339	11.254	Isoflavonoids	异黄酮	"53947-92-5"	13010	22640	13100
Com_824_pos	N-benzyl-9Z,12Z,15Z-octadecatrienamide	N-(9Z,12Z,15Z)十八碳三烯酰胺	C25H37NO	367.575	8.2	Fatty Acyls	脂肪酰类	"883715-18-2"	12940	18140	20020
Com_1446_pos	Arabidopyl ketoadipic acid	阿拉比多吡酮酸	C15H14O9	338.27	15.19	Organic Acid And Its Derivatives	有机酸及其衍生物		12832	10630	11830
Com_607_neg	DL-Panthenol	DL-泛酰醇	C9H19NO4	205.25	4.647	Fatty Acyls	脂肪酰类	"16485-10-2"	12586	8795	3211
Com_130_neg	Ptaquiloside	原厥苷	C20H30O8	398.45	11.23	Terpenoids	萜类	"87625-62-5"	12559	9084	8228
Com_998_pos	Atropine	阿托品	C17H23NO3	289.369	6.05	Alkaloids and derivatives	生物碱及其衍生物	"51-55-8"	12550	247500	216100
Com_725_neg	Ferulic acid methyl ester	阿魏酸甲酯	C11H12O4	208.21	8.84	Cinnamic acids and derivatives	肉桂酸及其衍生物	"2309-07-1"	12350	147900	140300
Com_1476_pos	columbianetin	二氢欧山芹醇	C14H14O4	246.263	6.86	Flavonoids	类黄酮	"3804-70-4"	12240	10000000	10180000
Com_642_neg	Tectorigenin	射干苷元	C16H12O6	300.263	8.849	Isoflavonoids	异黄酮	"548-77-6"	12220	216900	236500
Com_1071_pos	Isoliensinine	异莲心碱	C37H42N2O6	610.751	5.91	Isoquinolines and derivatives	异喹啉及其衍生物	"6817-41-0"	11920	29450	15320
Com_101_neg	Gossypetin	棉花素	C15H10O8	318.24	7.34	Flavonoids and flavonols	黄酮和黄酮醇	"489-35-0"	11920	23620	16930
Com_574_neg	L-Cysteinesulfinic acid	L-半胱亚磺酸	C3H7NO4S	153.16	0.88	Organic Acid And Its Derivatives	有机酸及其衍生物	"1115-65-7"	11890	15170	21980
Com_470_neg	Coumestrol	香豆雌酚	C15H8O5	268.226	8.69	Isoflavonoids	异黄酮	"479-13-0"	11830	17540	17040
Com_1356_pos	Eleutheroside E	刺五加苷E	C34H46O18	742.718	6.19	Lignans	木脂素类	"39432-56-9"	11769	7790	10610
Com_163_neg	Inosine diphosphate	二磷酸肌苷(IDP)	C10H14N4O11P2	522.149	0.98	Nucleotide And Its Derivates	核苷酸及其衍生物	"86-04-4"	11740	90980	113700
Com_1572_pos	Osalmide	柳胺酚	C13H11NO3	229.23	8.683	Benzene and substituted derivatives	苯及其取代衍生物	"526-18-1"	11690	43120	41440
Com_173_neg	4-Hydroxychalcone	2-羟基查耳酮	C15H12O2	224.25	10.6	Phenylpropanoids and polyketides	苯丙素和聚酮化合物	"20426-12-4"	11620	34480	28450
Com_1393_pos	5-O-Caffeoylshikimic acid	咖啡酰莽草酸	C16H16O8	336.293	11.63	Cinnamic acids and derivatives	肉桂酸及其衍生物	"180981-12-8"	11560	49830	63480
Com_1139_pos	Alpinetin	山姜素	C16H14O4	270.28	9.11	Flavanones	黄烷酮	"36052-37-6"	11540	9215	8497
Com_1245_pos	Heteroclitin D	异型南五味子丁素	C27H30O8	482.522	0.72	Tannins	鞣质	"140369-76-2"	11530	4004	4410
Com_1676_pos	methylapigenin C-rhamnoside	甲基芹菜素-C-鼠李糖苷	C22H22O9	430.405	8.15	Flavonoids	类黄酮		11473	13660	10410
Com_1704_pos	Loureirin A	龙血素A	C17H18O4	286.328	10.4	Chalcones and dihydrochalcones	查尔酮和二氢查尔酮	"119425-89-7"	11410	21510	21370
Com_313_neg	Carvacrol	香荆芥酚	C10H14O	150.22	1.467	Terpenoids	萜类	"499-75-2"	11370	17300	10020
Com_1403_pos	Kojic acid	曲酸	C6H6O4	142.11	2.388	Organoheterocyclic compounds	有机杂环化合物	"501-30-4"	11360	321300	312400
Com_381_neg	Purpurin	羟基茜草素	C14H8O5	256.21	10.545	Flavanones	黄烷酮	"81-54-9"	11280	5965	5377
Com_399_neg	2-Methoxycinnamic acid	2-甲氧基肉桂酸	C10H10O3	178.18	8.79	Cinnamic acids and derivatives	肉桂酸及其衍生物	"6099-03-2"	11220	12450	8587
Com_1758_pos	Pterosin G	蕨素G	C14H18O3	234.295	11.21	Terpenoids	萜类	"35964-50-2"	11201	15320	10250
Com_1571_pos	Benzoylmesaconine	苯甲酰新乌头原碱	C31H43NO10	589.683	7.33	Alkaloids and derivatives	生物碱及其衍生物	"63238-67-5"	11175	6686	8194
Com_881_pos	Feruloylcholine	阿魏酰胆碱	C15H22NO4	280	12.63	Cinnamic acids and derivatives	肉桂酸及其衍生物		11070	92780	62870
Com_282_neg	Picroside II	胡黄连苷 II	C23H28O13	512.46	6.63	Phenylpropanoids and polyketides	苯丙素和聚酮化合物	"39012-20-9"	10930	15250	17280
Com_766_pos	Tianshic acid	天水酸	C18H37NO5	347.49	0.97	Fatty Acyls	脂肪酰类		10830	30770	31700
Com_1790_pos	methyl oxo pentanoate	4-甲基-2-氧戊酸	C6H10O3	130.142	10.97	Organic Acid And Its Derivatives	有机酸及其衍生物	"816-66-0"	10740	11240	16830
Com_416_neg	Theaflavin	茶黄素	C29H24O12	564.502	7.16	Flavonoids	类黄酮	"4670-05-7"	10580	313400	314600
Com_1499_pos	Tricin O-glycerol	苜蓿素 O-甘油	C20H20O9	404.37	14.58	Flavonoids	类黄酮		10543	11800	8195
Com_749_neg	Swertiamarin	獐牙菜苦苷	C16H22O10	374.34	5.578	Terpenoids	萜类	"17388-39-5"	10500	9463	12720
Com_762_pos	L-Cystathionine	L-胱硫醚	C7H14N2O4S	222.262	0.84	Amino Acid And Derivatives	氨基酸及其衍生物	"56-88-2"	10430	26250	28380
Com_562_neg	1-Methyluric acid	1-甲基尿酸	C6H6N4O3	182.137	1.04	Organic Acid And Its Derivatives	有机酸及其衍生物	"708-79-2"	10430	22590	23140
Com_1434_pos	LPC(1-acyl 16:1)	LPC(1-酰基16:1)	C24H48NO7P	493.61	11.54	Phospholipid	磷脂		10320	193000	160400
Com_1364_pos	Tricin	苜蓿素	C17H14O7	330.289	7.5	Flavones and Flavonols	黄酮和黄酮醇	"520-32-1"	10200	200600	189700
Com_403_neg	Maltotriose	麦芽三糖	C18H32O16	504.44	0.94	Carbohydrates And Its Derivatives	糖类及其衍生物	"1109-28-0"	10030	275400	211700
Com_1531_pos	Enterodiol	肠二醇	C18H22O4	302.152	16.98	Lignans	木脂素类	"80226-00-2"	9986	13610	10560
Com_679_neg	Mollugin	大叶茜草素	C17H16O4	284.312	9.08	Organoheterocyclic compounds	有机杂环化合物	"55481-88-4"	9844	5556	6400
Com_389_neg	Myrtillin chloride	花翠素 3-O-葡萄糖苷	C21H21ClO12	500.84	8.519	Anthocyanins	花青素	"6906-38-3"	9831	19780	9897
Com_1502_pos	Nebularine	9-(β-D-呋喃核糖)嘌呤	C10H12N4O4	252.227	9.81	Nucleotide And Its Derivates	核苷酸及其衍生物	"550-33-4"	9723	34330	24110
Com_593_neg	Callistephin chloride	氯化翠菊苷	C21H21ClO10	468.84	5.442	Anthocyanins	花青素	"18466-51-8"	9692	9183	8731
Com_1659_pos	UDP-N-acetylglucosamine	尿苷-5'-二磷酸-N-乙酰葡糖胺	C17H27N3O17P2	607.354	0.99	Nucleotide And Its Derivates	核苷酸及其衍生物	"528-04-1"	9516	16530	22010
Com_650_neg	(-)-Syringaresnol-4-O-beta-D-apiofuranosyl-(1→2)-beta-D-glucopyran	(-)-丁香树脂酚-4-O-β-D-呋喃芹糖基-(1→2)-β-D-吡喃葡萄糖苷	C33H44O17	712.692	1.01	Glycosides	糖苷类	"136997-64-3"	9482	7113	6317
Com_476_neg	Manninotriose	甘露三糖	C18H32O16	504.437	0.9	Fatty Acyls	脂肪酰类	"13382-86-0"	9370	97010	95450
Com_213_neg	dADP	2'-脱氧腺苷-5'-二磷酸	C10H15N5O9P2	411.202	0.75	Nucleotide And Its Derivates	核苷酸及其衍生物	"2793-06-8"	9366	20540	12170
Com_892_pos	Nomilin	诺米林	C28H34O9	514.56	10.451	Terpenoids	萜类	"1063-77-0"	9290	56510000	51810000
Com_1432_pos	LPC(1-acyl 18:1)	LPC(1-酰基18:1)	C26H52NO7P	521.67	12.76	Phospholipid	磷脂		9270	11280000	8980000
Com_823_pos	Wighteone	5,7,4'三羟基-6-异戊烯基异黄酮	C20H18O5	338.36	9.59	Isoflavonoids	异黄酮	"51225-30-0"	9092	14930	15990
Com_39_neg	Urolithin A	尿石素A	C13H8O4	228.2	7.91	Coumarins and derivatives	香豆素及其衍生物	"1143-70-0"	9014	9719	5148
Com_91_neg	Loureirin B	龙血素B	C18H20O5	316.354	10.51	Chalcones and dihydrochalcones	查尔酮和二氢查尔酮	"119425-90-0"	8900	6544	8691
Com_1280_pos	Jervine	蒜黎芦碱	C27H39NO3	425.6	7.64	Alkaloids and derivatives	生物碱及其衍生物	"469-59-0"	8713	15710	11910
Com_443_neg	Stachyose	水苏糖	C24H42O21	666.578	0.93	Carbohydrates And Its Derivatives	糖类及其衍生物	"470-55-3"	8671	1624000	1230000
Com_1479_pos	Geissoschizine methyl ether	缝籽嗪甲醚	C22H26N2O3	366.46	8.14	Alkaloids and derivatives	生物碱及其衍生物	"60314-89-8"	8641	51520	49500
Com_941_pos	Sibutramine	西布曲明	C17H26ClN	279.848	12.68	Benzene and substituted derivatives	苯及其取代衍生物	"106650-56-0"	8634	82810	82180
Com_1745_pos	Denin	丹宁	C33H56O14	676.79	11.46	Steroids and steroid derivatives	类固醇及其衍生物		8617	96310	73190
Com_1628_pos	Muscone	麝香酮	C16H30O	238.41	15.95	Carbonyl compounds	醛酮类	"541-91-3"	8548	8792	9483
Com_1292_pos	Nortanshinone	去甲丹参酮	C17H12O4	280.274	15.76	Quinones	醌类	"97399-70-7"	8524	6871	9882
Com_1670_pos	Selgin C-hexoside	羟甲基黄酮 C-己糖苷	C22H22O12	478.4	0.74	Flavonoids	类黄酮		8478	18690	10550
Com_115_neg	Apigenin 4-O-rhamnoside	芹菜素 4'-O-鼠李糖苷	C21H20O9	416	7.971	Flavonoids	类黄酮	"133538-77-9"	8469	11310	15560
Com_552_neg	Dehydrodiisoeugenol	去氢二异丁香酚	C20H22O4	326.392	10.36	Phenylpropanoids and polyketides	苯丙素和聚酮化合物	"2680-81-1"	8467	6126	4791
Com_490_neg	Deoxycytidine	脱氧胞苷	C9H13N3O4	227.091	1.81	Nucleotide And Its Derivates	核苷酸及其衍生物	"951-77-9"	8399	15490	12960
Com_1510_pos	Hydroxytomatidenol	羟基番茄烯胺	C27H43NO3	429.63	5.59	Alkaloids and derivatives	生物碱及其衍生物		8372	17570	12210
Com_133_neg	trans-9-Octadecenoic acid	反式-9-十八烯酸	C18H34O2	282.461	12.86	Fatty Acyls	脂肪酰类	"112-79-8"	8217	5499	4157
Com_81_neg	Ureidoisobutyric acid	脲基异丁酸	C5H10N2O3	146.069	0.86	Organic Acid And Its Derivatives	有机酸及其衍生物	"2905-86-4"	8202	3738	6348
Com_641_neg	Kaempferitrin	山奈苷	C27H30O14	578.519	6.641	Flavones and Flavonols	黄酮和黄酮醇	"482-38-2"	8120	5858	5953
Com_528_neg	Diacerein	双醋瑞因	C19H12O8	368.29	9.512	Quinones	醌类	"13739-02-1"	8119	19430	18730
Com_82_neg	Adenylosuccinic acid	腺苷酸基琥珀酸	C14H18N5O11P	463.293	0.91	Organic Acid And Its Derivatives	有机酸及其衍生物	"19046-78-7"	8053	21620	19360
Com_284_neg	Sesamol	芝麻酚	C7H6O3	138.12	6.79	Phenols And Its Derivatives	酚类及其衍生物	"533-31-3"	7900	36120	44670
Com_570_neg	Harpagoside	哈巴俄苷	C24H30O11	494.488	8.099	Terpenoids	萜类	"19210-12-9"	7798	7889	4810
Com_1631_pos	Panaxatriol	人参三醇	C30H52O4	476.73	12.817	Terpenoids	萜类	"32791-84-7"	7756	8518	9506
Com_300_neg	Ecliptasaponin A	旱莲苷 A	C36H58O9	634.851	10.1	Terpenoids	萜类		7711	3720	3298
Com_336_neg	N-Oleoyl Glycine	N-油酰甘氨酸	C20H37NO3	339.513	14.62	Organic Acid And Its Derivatives	有机酸及其衍生物	"2601-90-3"	7711	4674	4564
Com_121_neg	10-Deacetylasperulosidic acid	去乙酰车叶草酸	C16H22O11	390.344	2.56	Terpenoids	萜类	"14259-55-3"	7709	18520	17970
Com_1264_pos	4-Demethylepipodophyllotoxin	4'-去甲基表鬼臼毒素	C21H20O8	400.38	11	Lignans	木脂素类	"6559-91-7"	7608	15890	9019
Com_1598_pos	Chrysoeriol O-feruloylhexosyl-O-hexoside	金圣草黄素 O-阿魏酰基己糖基-O-己糖苷	C38H40O19	800.724	0.99	Flavonoids	类黄酮		7592	6401	5140
Com_760_pos	Leu-Pro	L-亮氨酰-L-脯氨酸	C11H21ClN2O3	264.749	9.91	Amino Acid And Derivatives	氨基酸及其衍生物	"87178-63-0"	7516	13380	8711
Com_325_neg	6-(Dimethylamino)purine	6-二甲氨基嘌呤	C7H9N5	163.18	3.931	Purines and purine derivatives	嘌呤及其衍生物	"938-55-6"	7317	3411	3053
Com_1424_pos	LysoPC 19:0	溶血磷脂酰胆碱 19:0	C27H56NO7P	537.71	3.95	Phospholipid	磷脂	"108273-88-7"	7226	21730	21590
Com_314_neg	Syringic acid	丁香酸	C9H10O5	198.17	6.09	Benzoic acids and derivatives	苯甲酸及其衍生物	"530-57-4"	7206	6134	3870
Com_1609_pos	N-Coumaroyltyramine	N-对反式香豆酰酪胺	C17H17NO3	283.322	7.73	Amino Acid And Derivatives	氨基酸及其衍生物	"36417-86-4"	7117	15540	22110
Com_413_neg	Jionoside A1	焦地黄苯乙醇苷A1	C36H48O20	800.764	6.15	Carbohydrates And Its Derivatives	糖类及其衍生物	"120444-60-2"	7057	13700	14570
Com_99_neg	Maltopentaose	麦芽五糖	C30H52O26	828.726	0.99	Carbohydrates And Its Derivatives	糖类及其衍生物	"34620-76-3"	7041	44570	48390
Com_127_neg	Robinin	刺槐素	C33H40O19	740.216	7.46	Flavonoids	类黄酮	"301-19-9"	7020	101200	110400
Com_534_neg	Ginsenoside C-K	人参皂苷CK	C36H62O8	622.873	1.02	Terpenoids	萜类	"39262-14-1"	6997	27360	24620
Com_962_pos	N-hexosyl-p-coumaroyl putrescine	对香豆酰腐胺己糖苷	C19H28N2O7	396.1	17.63	Cinnamic acids and derivatives	肉桂酸及其衍生物		6853	37960	30030
Com_726_neg	Curcurbitacin IIA	葫芦素 IIA	C32H50O8	562.73	10	Steroids and steroid derivatives	类固醇及其衍生物	"58546-34-2"	6795	3232	3642
Com_1391_pos	C-hexosyl-apigenin O-hexosyl-O-hexoside	C-己糖基-芹菜素O-己糖基-O-己糖苷	C33H40O20	756.66	0.98	Flavonoids	类黄酮		6787	57850	51630
Com_334_neg	CDP	5-胞苷二磷酸	C9H15N3O11P2	403.176	0.99	Nucleotide And Its Derivates	核苷酸及其衍生物	"63-38-7"	6699	49920	42600
Com_976_pos	Deoxynojirimycin	1-脱氧野尻霉素	C6H13NO4	163.173	0.73	Organoheterocyclic compounds	有机杂环化合物	"19130-96-2"	6671	9947	13840
Com_244_neg	Guanosine 5'-diphosphate	鸟苷5'-二磷酸	C10H15N5O11P2	443.201	1.08	Nucleotide And Its Derivates	核苷酸及其衍生物	"146-91-8"	6600	15190	16920
Com_513_neg	1-(4-Methoxyphenyl)-1-propanol	1-(4-甲氧苯基)-1-丙醇	C10H14O2	166.099	13.5	Phenolic acids	酚酸类	"5349-60-0"	6483	12230	12420
Com_810_pos	Betulonic acid	路路通酸	C30H46O3	454.68	11.061	Terpenoids	萜类	"4481-62-3"	6470	3482000	3847000
Com_1051_pos	3'-Hydroxypuerarin	3'-羟基葛根素	C21H20O10	432.384	5.28	Isoflavonoids	异黄酮	"117060-54-5"	6410	37890	34490
Com_557_neg	(-)-Gallocatechin	(-)-倍儿茶酸	C15H14O7	306.267	4.51	Flavonoids	类黄酮	"3371-27-5"	6372	6059	5221
Com_694_neg	Ginsenoside F1	人参皂苷 F1	C36H62O9	638.872	9.57	Terpenoids	萜类	"53963-43-2"	6372	5498	6483
Com_947_pos	Ambroxane	降龙涎香醚	C16H28O	236.393	14.01	Ethers	醚类	"6790-58-5"	6339	13990	11140
Com_1212_pos	Pilocarpine	毛果芸香碱	C11H16N2O2	208.257	4.24	Alkaloids and derivatives	生物碱及其衍生物	"92-13-7 "	6322	10190	8535
Com_1386_pos	Tricin O-sinapoylpentoside	三尖杉酯	C33H32O15	668.6	8.1	Flavonoids	类黄酮		6247	101000	124600
Com_907_pos	Epsilon-Viniferin	ε-葡萄素	C28H22O6	454.479	10	Phenylpropanoids and polyketides	苯丙素和聚酮化合物	"62218-08-0"	6238	1194000	1080000
Com_798_pos	Linderane	乌药醚内酯	C15H16O4	260.285	11.266	Terpenoids	萜类	"13476-25-0"	6236	36180	30140
Com_954_pos	Eugenol	丁香酚	C10H12O2	164.2	9.89	Phenylpropanoids	苯丙素类	"97-53-0"	6203	10240	13030
Com_1735_pos	Luteolin C-feruloylhexoside	木犀草素C-阿魏酰己糖苷	C31H28O14	624.555	7.9	Flavonoids	类黄酮		6196	158900	127200
Com_1070_pos	Piperine	胡椒碱	C17H19NO3	285.343	11.04	Alkaloids and derivatives	生物碱及其衍生物	"94-62-2"	6147	18500	12760
Com_206_neg	Emodin	大黄素	C15H10O5	270.24	11.453	Quinones	醌类	"518-82-1"	6119	75820	80280
Com_1277_pos	6-Chloropurine	6-氯嘌呤	C5H3ClN4	154.56	5.42	Purines and purine derivatives	嘌呤及其衍生物	"87-42-3"	6075	6184	10440
Com_903_pos	Mosloflavone	荠宁黄酮	C17H14O5	298.295	11.74	Flavones and Flavonols	黄酮和黄酮醇	"740-33-0"	6004	29980	29150
Com_315_neg	trans-Cinnamic acid	反式肉桂酸	C9H8O2	148.16	8.507	Cinnamic acids and derivatives	肉桂酸及其衍生物	"140-10-3"	5980	24340	18790
Com_1200_pos	LysoPC 18:1 (2n isomer)	溶血磷脂酰胆碱 18:1(2n异构)	C26H52NO7P	521.4	12.7	Phospholipid	磷脂		5887	11760000	9787000
Com_158_neg	Momordin Ic	地肤子皂苷Ic	C41H64O13	764.951	11.18	Terpenoids	萜类	"96990-18-0"	5864	3432	3570
Com_1064_pos	Decursinol angelate	紫花前胡醇当归酸酯	C19H20O5	328.36	12.19	Coumarins and derivatives	香豆素及其衍生物	"130848-06-5"	5787	14940	12710
Com_1458_pos	Methyl linolenate	亚麻酸甲酯	C19H32O2	292.46	16.057	Fatty Acyls	脂肪酰类	"301-00-8"	5754	30050	27800
Com_852_pos	N-(9H-Purin-6-ylcarbamoyl)threonine	N-(9H-嘌呤-6-氨基甲酰)苏氨酸	C10H12N6O4	280.24	14.46	Nucleotide And Its Derivates	核苷酸及其衍生物		5709	183300	168500
Com_1019_pos	Cimifugin	升麻素	C16H18O6	306.311	6.963	Carbohydrates And Its Derivatives	糖类及其衍生物	"37921-38-3"	5656	27550	13240
Com_609_neg	Gingerglycolipid B	姜糖脂B	C33H58O14	678.805	12.02	Glycerolipids	甘油酯	"88168-90-5"	5652	1029000	1431000
Com_332_neg	Cytosine	胞嘧啶	C4H5N3O	111.1	0.875	Nucleotide And Its Derivates	核苷酸及其衍生物	"71-30-7"	5323	41880	20180
Com_1075_pos	N-Sinapoylagmatine	N-西那波依拉明	C16H24N4O4	336.39	12.6	Phenolamides	酚胺		5135	6375	6865
Com_1408_pos	Asarinin	细辛脂素	C20H18O6	354.35	11.812	Phenylpropanoids	苯丙素类	"133-04-0"	5094	214800	215500
Com_140_neg	Lysope 16:0	溶血卵磷脂酰乙醇胺16:0	C21H44NO7P	453.55	12.48	Phospholipid	磷脂	"53862-35-4"	5086	4639000	4478000
Com_1016_pos	AKBA	11-羰基-β-乙酰乳香酸	C32H48O5	512.721	15.594	Terpenoids	萜类	"67416-61-9"	5053	2775	2643
Com_1263_pos	Capsaicin	辣椒碱	C18H27NO3	305.41	11.071	Alkaloids and derivatives	生物碱及其衍生物	"404-86-4"	4883	2211	2522
Com_344_neg	Farrerol	杜鹃素	C17H16O5	300.31	9.935	Flavanones	黄烷酮	"24211-30-1"	4860	69720	73440
Com_1757_pos	Pterosin Z	蕨素Z	C15H20O2	232.323	12.01	Terpenoids	萜类	"34169-69-2"	4789	5334	2029
Com_626_neg	Gastrodin	天麻素	C13H18O7	286.28	3.944	Phenols And Its Derivatives	酚类及其衍生物	"62499-27-8"	4744	126900	123900
Com_723_neg	Propylparaben	尼泊金丙酯	C10H12O3	180.2	9.67	Benzene and substituted derivatives	苯及其取代衍生物	"94-13-3"	4725	11820	8864
Com_1720_pos	Danshenol C	丹参醇C	C21H20O4	336.381	11.396	Alcohols and polyols	醇类和多元醇类	"910856-25-6"	4614	19400	10760
Com_257_neg	Acetoxyacetic acid	乙酰氧基乙酸	C4H6O4	118.027	1.89	Organic Acid And Its Derivatives	有机酸及其衍生物	"13831-30-6"	4543	5638	3435
Com_1331_pos	LysoPC 15:0	溶血磷脂酰胆碱 15:0	C23H48NO7P	481.3	11.94	Phospholipid	磷脂		4479	2058000	1734000
Com_1341_pos	Rutaecarpine	吴茱萸次碱	C18H13N3O	287.32	11.064	Alkaloids and derivatives	生物碱及其衍生物	"84-26-4"	4224	7771	5795
Com_1205_pos	(-)-Huperzine A	石杉碱甲	C15H18N2O	242.32	5.31	Alkaloids and derivatives	生物碱及其衍生物	"102518-79-6"	4026	14190	14120
Com_520_neg	Vitexin-2-O-rhaMnoside	牡荆素-2-O-鼠李糖苷	C27H30O14	578.52	6.411	Flavonoids	类黄酮	"64820-99-1"	4010	441000	442600
Com_1778_pos	Flavanone	黃烷酮	C15H12O2	224.25	11.564	Flavonoids	类黄酮	"487-26-3"	3977	11660	15010
Com_1728_pos	Spermidine derivative	亚精胺衍生物	C8H21N3O6	255.27	14.85	Amines	胺类		3796	52470	42960
Com_1650_pos	Auraptene	橙皮油内酯	C19H22O3	298.376	13.9	Terpenoids	萜类	"495-02-3"	3757	2774000	2378000
Com_898_pos	Decursin	紫花前胡素	C19H20O5	328.364	12.05	Coumarins and derivatives	香豆素及其衍生物	"5928-25-6"	3730	19890	17720
Com_1138_pos	Isoimperatorin	异欧前胡素	C16H14O4	270.28	12.29	Phenylpropanoids	苯丙素类	"482-45-1"	3730	8382000	6739000
Com_1398_pos	LysoPC 18:0	溶血磷脂酰胆碱 18:0	C26H54NO7P	523.36	13.8	Phospholipid	磷脂		3725	453100	335200
Com_117_neg	Keracyanin chloride	矢车菊素 3-O-芸香糖苷	C27H31ClO15	630.98	5.22	Anthocyanins	花青素	"18719-76-1"	3694	28980	30950
Com_418_neg	Wedelolactone	蟛蜞菊内酯	C16H10O7	314.246	8.229	Flavonoids	类黄酮	"524-12-9"	3612	64980	95390
Com_318_neg	Dihydrodehydrodiconiferyl Alcohol	二氢去氢愈创木基醇	C20H24O6	360.401	0.77	Phenylpropanoids and polyketides	苯丙素和聚酮化合物	"28199-69-1"	3560	26280	10260
Com_1435_pos	LPC(1-acyl 16:2)	LPC(1-酰基16:2)	C24H46NO7P	491.6	10.99	Phospholipid	磷脂		3548	144000	112200
Com_1171_pos	Biliverdin	胆绿素	C33H34N4O6	582.646	10.32	Organoheterocyclic compounds	有机杂环化合物	"114-25-0"	3468	33030	33410
Com_842_pos	4-(1H-Pyrazol-4-yl)-7-((2-(trimethylsilyl)ethoxy)-methyl)-7H-pyrrolo[2,3-d]pyrimidine	4-(1H-吡唑-4-基)-7-[[2-(三甲基硅烷基)乙氧基]甲基]-7H-吡咯并[2,3-d]嘧啶	C15H21N5OSi	315.446	9.72	Organoheterocyclic compounds	有机杂环化合物	"941685-27-4"	3191	20770	21930
Com_634_neg	Columbin	古伦宾	C20H22O6	358.385	8.883	Organoheterocyclic compounds	有机杂环化合物	"546-97-4"	3157	5814	3953
Com_1349_pos	Cyclovirobuxine D	环维黄杨星D	C26H46N2O	402.664	10.45	Terpenoids	萜类	"860-79-7"	2894	14390000	13090000
Com_1548_pos	beta-Tocopherol	D-β-生育酚	C28H48O2	416.68	4.22	Vitamins	维生素	"16698-35-4"	2884	12640	10610
Com_700_neg	Benzyl acetate	乙酸苄酯	C9H10O2	150.068	13.51	Benzene and substituted derivatives	苯及其取代衍生物	"140-11-4"	2813	6820	6078
Com_1397_pos	LysoPC 14:0 (2n isomer)	溶血磷脂酰胆碱 14:0(2n异构)	C22H46NO7P	467.3	11.36	Phospholipid	磷脂		2764	517900	390500
Com_1706_pos	Triptonide	雷公藤内酯酮	C20H22O6	358.391	10.13	Terpenoids	萜类	"38647-11-9"	2655	114600	88770
Com_1024_pos	5-Sulfanyl-1-pentanesulfonamide	5-磺胺基-1-戊磺胺	C5H13NO2S2	183.29	15.17	Amines	胺类		2629	22400	25940
Com_1562_pos	Moslosooflavone	苏荠宁黄酮	C17H14O5	298.295	11.74	Flavones and Flavonols	黄酮和黄酮醇	"3570-62-5"	2602	5955	4463
Com_1357_pos	Butylscopolamine	丁基东莨菪碱	C21H30NO4	360.474	9.13	Organic Acid And Its Derivatives	有机酸及其衍生物	"7182-53-8"	2577	162400	156800
Com_86_neg	LysoPE 16:0 (2n isomer)	溶血磷脂酰乙醇胺 16:0(2n异构)	C21H44NO7P	453.3	12.5	Phospholipid	磷脂		2382	4809000	4599000
Com_142_neg	Lysope 18:1	溶血卵磷脂酰乙醇胺18:1	C23H46NO7P	479.588	12.81	Phospholipid	磷脂		2359	1093000	1086000
Com_428_neg	D(+)-Melezitose O-rhamnoside	松三糖 O-鼠李糖苷	C24H42O20	650.1	1.05	Carbohydrates And Its Derivatives	糖类及其衍生物		2291	93160	82940
Com_1179_pos	N-Sinapoyl agmatine	芥子酰胍丁胺	C16H24N4O4	336.3	12.67	Phenols And Its Derivatives	酚类及其衍生物		2073	24210	22170
Com_841_pos	Flavokawain A	卡瓦胡椒素A	C18H18O5	314.333	12.89	Phenylpropanoids and polyketides	苯丙素和聚酮化合物	"64680-84-8"	1949	280200	229600
Com_846_pos	Isobavachalcone	异补骨脂查尔酮	C20H20O4	324.37	11.93	Chalcones and dihydrochalcones	查尔酮和二氢查尔酮	"20784-50-3"	1918	52410	65600
Com_1018_pos	Irisflorentin	次野鸢尾黄素	C20H18O8	386.352	10.237	Isoflavonoids	异黄酮	"41743-73-1"	1846	3689000	3478000
Com_306_neg	Liquiritigenin	甘草素	C15H12O4	256.25	8.9	Flavanones	黄烷酮	"578-86-9"	1705	3619	4743
Com_1619_pos	Columbianadin	二氢欧山芹醇当归酸酯	C19H20O5	328.359	12.378	Phenylpropanoids	苯丙素类	"5058-13-9"	1628	11680	15600
Com_1324_pos	Sinapoyl quinic acid	芥子酰奎宁酸	C18H22O10	398.3	13.55	Organic Acid And Its Derivatives	有机酸及其衍生物		1624	16570	12700
Com_755_neg	Cardamonin	豆蔻明	C16H14O4	270.28	11.62	Chalcones and dihydrochalcones	查尔酮和二氢查尔酮	"18956-16-6"	1436	12330	15960
Com_1332_pos	MAG (18:1)	单酰甘油酯 (酰基 18:1)	C21H40O4	356.2	15.2	Glycerolipids	甘油酯		1359	15620	17250
Com_1630_pos	Schizandrol A	五味子醇甲	C24H32O7	432.51	10.977	Phenylpropanoids	苯丙素类	"7432-28-2"	1280	121800	109300
Com_973_pos	1,7-Dimethoxyxanthone	1,7-二甲氧基口山酮	C15H12O4	256.258	10.96	Benzene and substituted derivatives	苯及其取代衍生物		1019	3659	6297
Com_1748_pos	LysoPC 20:2 (2n isomer)	溶血磷脂酰胆碱 20:2(2n异构)	C28H54NO7P	547.36	13.26	Phospholipid	磷脂		933	152900	126400
